# Supplementary material for: Characterization of Early-Phase Neutrophil Extracellular Traps in Urinary Tract Infections
Source: PubMed Central journal article supplement (PMC5298345; doi:10.1371/journal.ppat.1006151), 2017-01-27

# Supplementary Data, Dataset S4: Citrullinated peptides of proteins isolated from AUP samples

MS/MS data consistent with citrullination of proteins

- citrullination on arginine (R) will cause a mass increase of 0.98 Da:
- neutral losses considered;
- matched peptides containing N/Q were excluded if fragmentation spectra did not allow differentiating between deamidation of N/Q and deamidation of R residues; all spectra were manually inspected

**This data is derived from shotgun proteomic datasets using the Q-Exactive mass spectrometer and Proteome Discoverer or MaxQuant analysis software tools to assess a peptide citrullination site deamidation of arginine); MS methods are described in the method section of the main text.**

**Sequest HT/Proteome Discoverer: slides 1-6, 8-10, 12-32**

**Andromeda/MaxQuant: slides 7 and 11**

# AUP sample #157

| Accession | Description                |
|-----------|----------------------------|
| P16403    | Histone H1.2 - [H12_HUMAN] |

| Sequence | Modifications  | XCorr | Charge | MH+ [Da] | $\Delta M$ [ppm] | # Missed Cleavages |
|----------|----------------|-------|--------|----------|------------------|--------------------|
| AGGTPrK  | R6(Deamidated) | 2.04  | 2      | 687.3762 | -3.36            | 1                  |

| #1 | b <sup>+</sup> | b <sup>2+</sup> | Seq.        | y <sup>+</sup> | y <sup>2+</sup> | #2 |
|----|----------------|-----------------|-------------|----------------|-----------------|----|
| 1  | 72.04440       | 36.52584        | A           |                |                 | 7  |
| 2  | 129.06587      | 65.03657        | G           | 616.34134      | 308.67431       | 6  |
| 3  | 186.08734      | 93.54731        | G           | 559.31987      | 280.16357       | 5  |
| 4  | 287.13502      | 144.07115       | T           | 502.29840      | 251.65284       | 4  |
| 5  | 384.18779      | 192.59753       | P           | 401.25072      | 201.12900       | 3  |
| 6  | 541.27292      | 271.14010       | R-Deamid... | 304.19795      | 152.60261       | 2  |
| 7  |                |                 | K           | 147.11281      | 74.06004        | 1  |

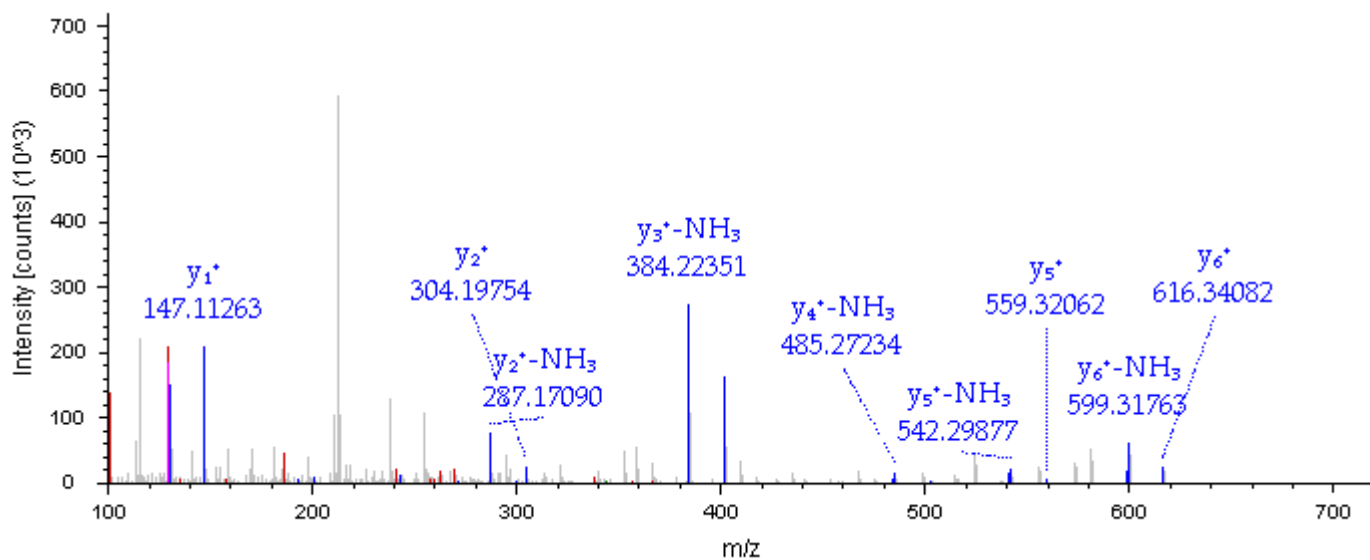

# AUP sample #157

| Accession | Description                 |
|-----------|-----------------------------|
| P06748    | Nucleophosmin - [NPM_HUMAN] |

| Sequence  | Modifications  | XCorr | Charge | MH+ [Da] | $\Delta M$ [ppm] | # Missed Cleavages |
|-----------|----------------|-------|--------|----------|------------------|--------------------|
| rSAPGGGSK | R1(Deamidated) | 1.77  | 2      | 817.4139 | -2.91            | 1                  |

| #1 | b+        | b <sup>2+</sup> | Seq.        | y+        | y <sup>2+</sup> | #2 |
|----|-----------|-----------------|-------------|-----------|-----------------|----|
| 1  | 158.09241 | 79.54984        | R-Deamid... |           |                 | 9  |
| 2  | 245.12444 | 123.06586       | S           | 660.33117 | 330.66922       | 8  |
| 3  | 316.16156 | 158.58442       | A           | 573.29914 | 287.15321       | 7  |
| 4  | 413.21433 | 207.11080       | P           | 502.26202 | 251.63465       | 6  |
| 5  | 470.23580 | 235.62154       | G           | 405.20925 | 203.10826       | 5  |
| 6  | 527.25727 | 264.13227       | G           | 348.18778 | 174.59753       | 4  |
| 7  | 584.27874 | 292.64301       | G           | 291.16631 | 146.08679       | 3  |
| 8  | 671.31077 | 336.15902       | S           | 234.14484 | 117.57606       | 2  |
| 9  |           |                 | K           | 147.11281 | 74.06004        | 1  |

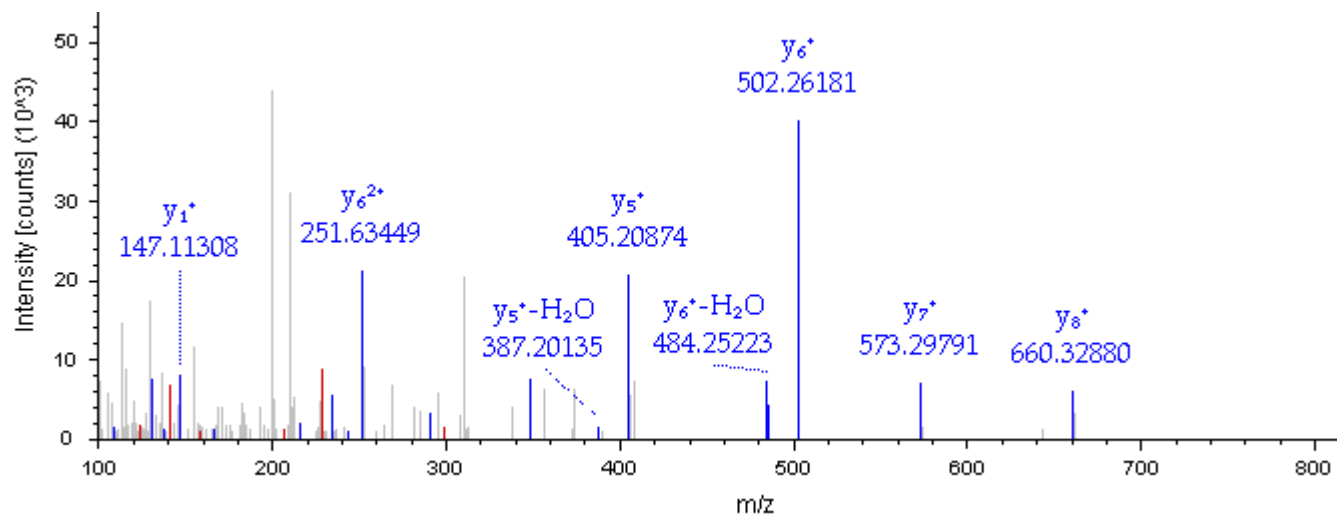

# AUP sample #157

| Accession | Description                                            |
|-----------|--------------------------------------------------------|
| P38159    | RNA-binding motif protein, X chromosome - [RBMX_HUMAN] |

| Sequence     | Modifications  | XCorr | Charge | MH+ [Da]  | $\Delta$ M [ppm] | # Missed Cleavages |
|--------------|----------------|-------|--------|-----------|------------------|--------------------|
| GPPPrSGGPPPK | R5(Deamidated) | 1.49  | 2      | 1144.6076 | -2.98            | 1                  |

| #1 | Immonium  | a <sup>+</sup> | b <sup>+</sup> | Seq.        | y <sup>+</sup> | #2 |
|----|-----------|----------------|----------------|-------------|----------------|----|
| 1  | 30.03383  | 30.03383       | 58.02875       | G           |                | 12 |
| 2  | 70.06513  | 127.08660      | 155.08152      | P           | 1087.58954     | 11 |
| 3  | 70.06513  | 224.13937      | 252.13429      | P           | 990.53677      | 10 |
| 4  | 70.06513  | 321.19214      | 349.18706      | P           | 893.48400      | 9  |
| 5  | 129.11348 | 478.27728      | 506.27219      | R-Deamid... | 796.43123      | 8  |
| 6  | 60.04439  | 565.30931      | 593.30422      | S           | 639.34609      | 7  |
| 7  | 30.03383  | 622.33078      | 650.32569      | G           | 552.31406      | 6  |
| 8  | 30.03383  | 679.35225      | 707.34716      | G           | 495.29259      | 5  |
| 9  | 70.06513  | 776.40502      | 804.39993      | P           | 438.27112      | 4  |
| 10 | 70.06513  | 873.45779      | 901.45270      | P           | 341.21835      | 3  |
| 11 | 70.06513  | 970.51056      | 998.50547      | P           | 244.16558      | 2  |
| 12 |           |                |                | K           | 147.11281      | 1  |

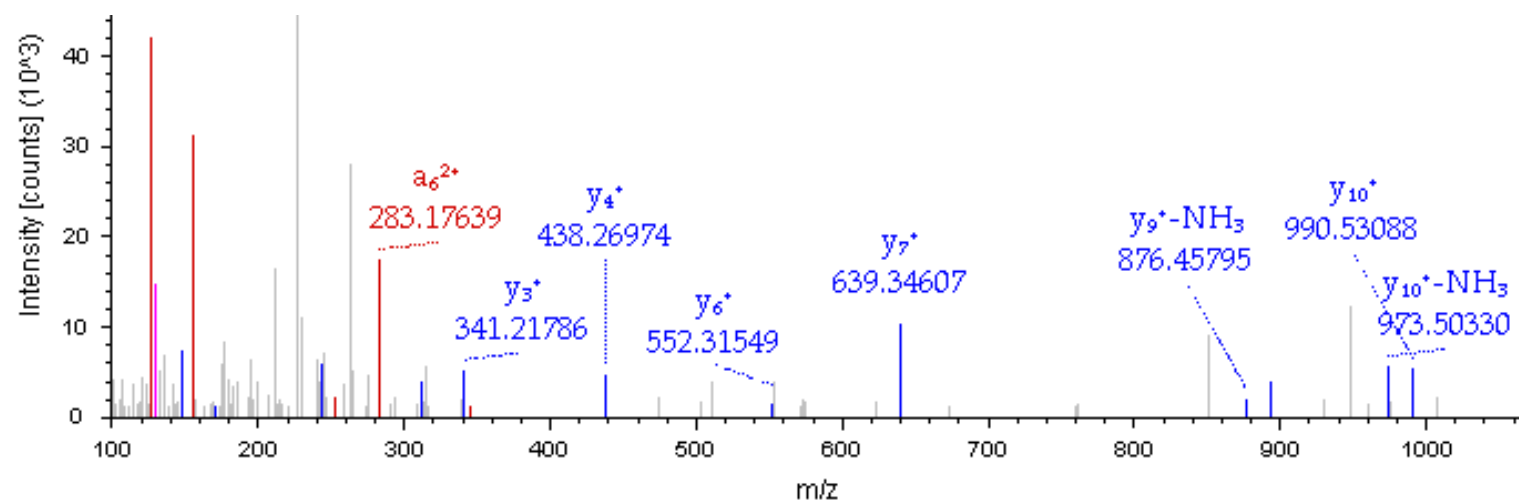

# AUP sample #157

Sequence: IDSGLYLGSYGFTAIQNLR, R19-Deamidated (0.98402 Da)

Charge: +2, Monoisotopic m/z: 1045.03784 Da (+4.15 mmu/+3.97 ppm), MH+: 2089.06841 Da, RT: 49.83 min,

Identified with: Sequest HT (v1.3); XCorr:2.33, Ions matched by search engine: 0/0

Fragment match tolerance used for search: 0.02 Da

Fragments used for search: b; b-H<sub>2</sub>O; b-NH<sub>3</sub>; y; y-H<sub>2</sub>O; y-NH<sub>3</sub>

Protein references (1):

- Lactotransferrin OS=Homo sapiens GN=LTF PE=1 SV=6 - [TRFL\_HUMAN]

| #1 | Immonium  | a <sup>+</sup> | a <sup>2+</sup> | b <sup>+</sup> | b <sup>2+</sup> | Seq.        | y <sup>+</sup> | y <sup>2+</sup> | #2 |
|----|-----------|----------------|-----------------|----------------|-----------------|-------------|----------------|-----------------|----|
| 1  | 86.09643  | 86.09643       | 43.55185        | 114.09135      | 57.54931        | I           |                |                 | 19 |
| 2  | 88.03931  | 201.12338      | 101.06533       | 229.11830      | 115.06279       | D           | 1975.97605     | 988.49166       | 18 |
| 3  | 60.04439  | 288.15541      | 144.58134       | 316.15033      | 158.57880       | S           | 1860.94910     | 930.97819       | 17 |
| 4  | 30.03383  | 345.17688      | 173.09208       | 373.17180      | 187.08954       | G           | 1773.91707     | 887.46217       | 16 |
| 5  | 86.09643  | 458.26095      | 229.63411       | 486.25587      | 243.63157       | L           | 1716.89560     | 858.95144       | 15 |
| 6  | 136.07568 | 621.32427      | 311.16577       | 649.31919      | 325.16323       | Y           | 1603.81153     | 802.40940       | 14 |
| 7  | 86.09643  | 734.40834      | 367.70781       | 762.40326      | 381.70527       | L           | 1440.74821     | 720.87774       | 13 |
| 8  | 30.03383  | 791.42981      | 396.21854       | 819.42473      | 410.21600       | G           | 1327.66414     | 664.33571       | 12 |
| 9  | 60.04439  | 878.46184      | 439.73456       | 906.45676      | 453.73202       | S           | 1270.64267     | 635.82497       | 11 |
| 10 | 30.03383  | 935.48331      | 468.24529       | 963.47823      | 482.24275       | G           | 1183.61064     | 592.30896       | 10 |
| 11 | 136.07568 | 1098.54663     | 549.77695       | 1126.54155     | 563.77441       | Y           | 1126.58917     | 563.79822       | 9  |
| 12 | 120.08078 | 1245.61505     | 623.31116       | 1273.60997     | 637.30862       | F           | 963.52585      | 482.26656       | 8  |
| 13 | 74.06004  | 1346.66273     | 673.83500       | 1374.65765     | 687.83246       | T           | 816.45743      | 408.73235       | 7  |
| 14 | 44.04948  | 1417.69985     | 709.35356       | 1445.69477     | 723.35102       | A           | 715.40975      | 358.20851       | 6  |
| 15 | 86.09643  | 1530.78392     | 765.89560       | 1558.77884     | 779.89306       | I           | 644.37263      | 322.68995       | 5  |
| 16 | 101.07094 | 1658.84250     | 829.92489       | 1686.83742     | 843.92235       | Q           | 531.28856      | 266.14792       | 4  |
| 17 | 87.05529  | 1772.88543     | 886.94635       | 1800.88035     | 900.94381       | N           | 403.22998      | 202.11863       | 3  |
| 18 | 86.09643  | 1885.96950     | 943.48839       | 1913.96442     | 957.48585       | L           | 289.18705      | 145.09716       | 2  |
| 19 |           |                |                 |                |                 | R-Deamid... | 176.10298      | 88.55513        | 1  |

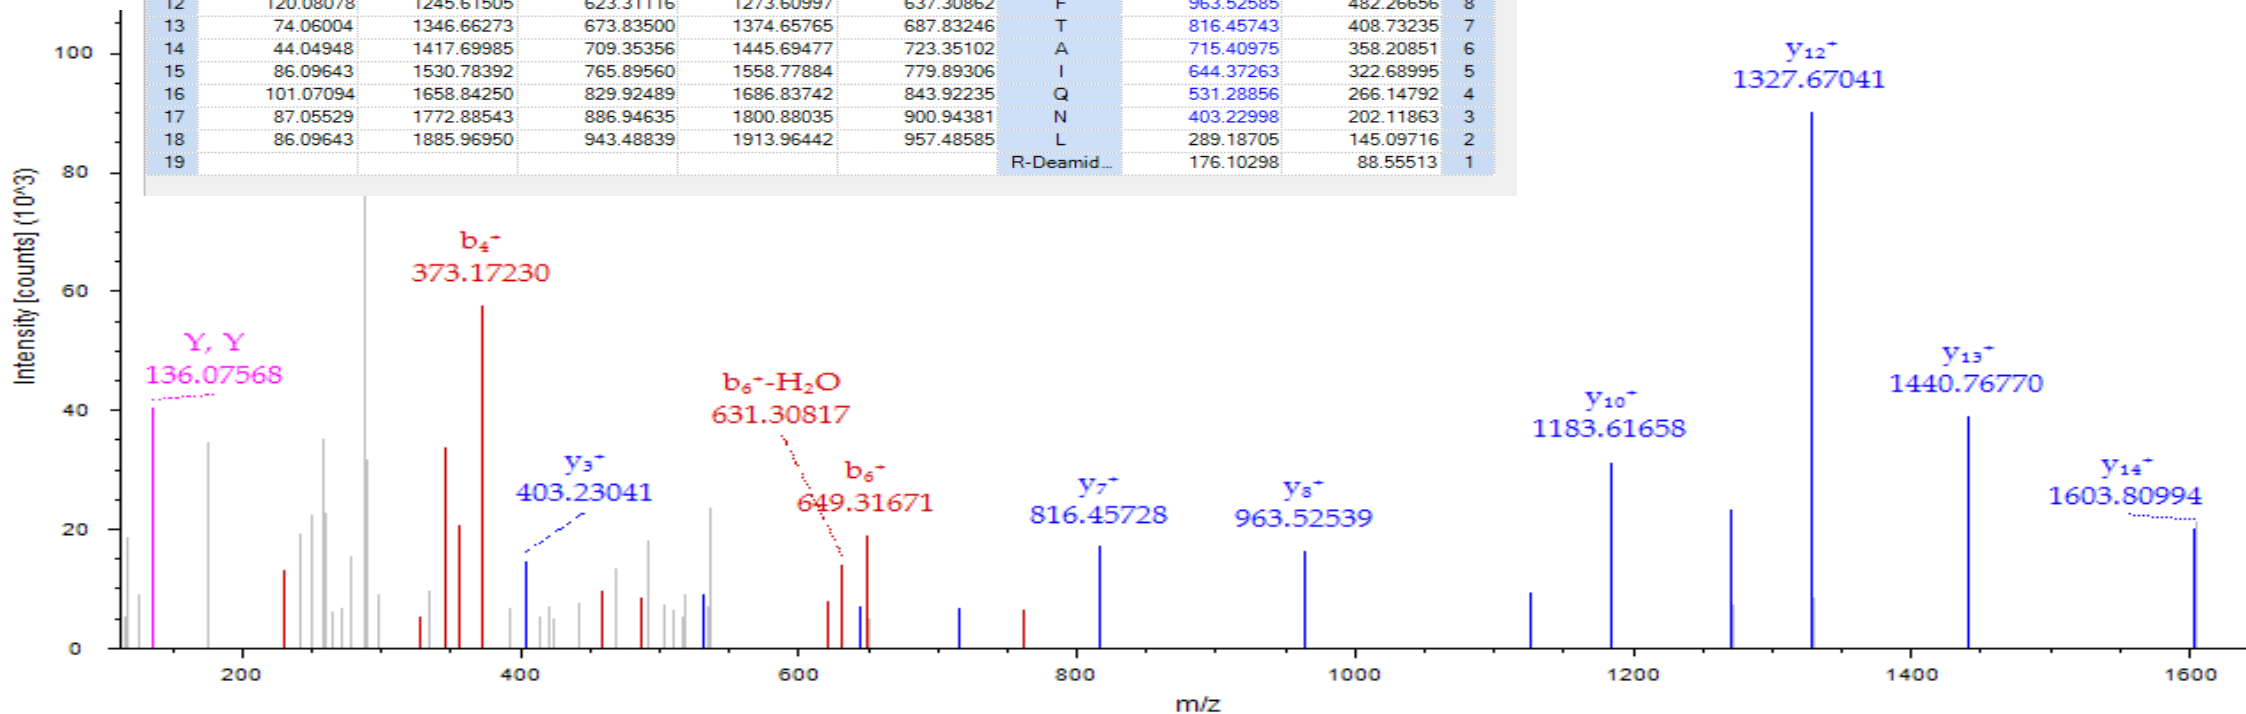

# AUP sample #112

Sequence: VARKSAPATGGVK, R3-Deamidated (0.98402 Da)

Charge: +3, Monoisotopic m/z: 414.91092 Da (+0.56 mmu/+1.34 ppm), MH+: 1242.71820 Da, RT: 13.79 min,

Identified with: Sequest HT (v1.3); XCorr:2.47, Ions matched by search engine: 0/0

Fragment match tolerance used for search: 0.02 Da

Fragments used for search: b; b-H<sub>2</sub>O; b-NH<sub>3</sub>; y; y-H<sub>2</sub>O; y-NH<sub>3</sub>

Protein references (1):

- Histone H3.1t OS=Homo sapiens GN=HIST3H3 PE=1 SV=3 - [H31T\_HUMAN]

| #1 | Immonium  | a <sup>+</sup> | a <sup>2+</sup> | b <sup>+</sup> | b <sup>2+</sup> | Seq.        | y <sup>+</sup> | y <sup>2+</sup> | #2 |
|----|-----------|----------------|-----------------|----------------|-----------------|-------------|----------------|-----------------|----|
| 1  | 72.08078  | 72.08078       | 36.54403        | 100.07570      | 50.54149        | V           |                |                 | 13 |
| 2  | 44.04948  | 143.11790      | 72.06259        | 171.11282      | 86.06005        | A           | 1143.64812     | 572.32770       | 12 |
| 3  | 129.11348 | 300.20304      | 150.60516       | 328.19795      | 164.60261       | R-Deamid... | 1072.61100     | 536.80914       | 11 |
| 4  | 101.10733 | 428.29801      | 214.65264       | 456.29292      | 228.65010       | K           | 915.52586      | 458.26657       | 10 |
| 5  | 60.04439  | 515.33004      | 258.16866       | 543.32495      | 272.16611       | S           | 787.43089      | 394.21908       | 9  |
| 6  | 44.04948  | 586.36716      | 293.68722       | 614.36207      | 307.68467       | A           | 700.39886      | 350.70307       | 8  |
| 7  | 70.06513  | 683.41993      | 342.21360       | 711.41484      | 356.21106       | P           | 629.36174      | 315.18451       | 7  |
| 8  | 44.04948  | 754.45705      | 377.73216       | 782.45196      | 391.72962       | A           | 532.30897      | 266.65812       | 6  |
| 9  | 74.06004  | 855.50473      | 428.25600       | 883.49964      | 442.25346       | T           | 461.27185      | 231.13956       | 5  |
| 10 | 30.03383  | 912.52620      | 456.76674       | 940.52111      | 470.76419       | G           | 360.22417      | 180.61572       | 4  |
| 11 | 30.03383  | 969.54767      | 485.27747       | 997.54258      | 499.27493       | G           | 303.20270      | 152.10499       | 3  |
| 12 | 72.08078  | 1068.61609     | 534.81168       | 1096.61100     | 548.80914       | V           | 246.18123      | 123.59425       | 2  |
| 13 |           |                |                 |                |                 | K           | 147.11281      | 74.06004        | 1  |

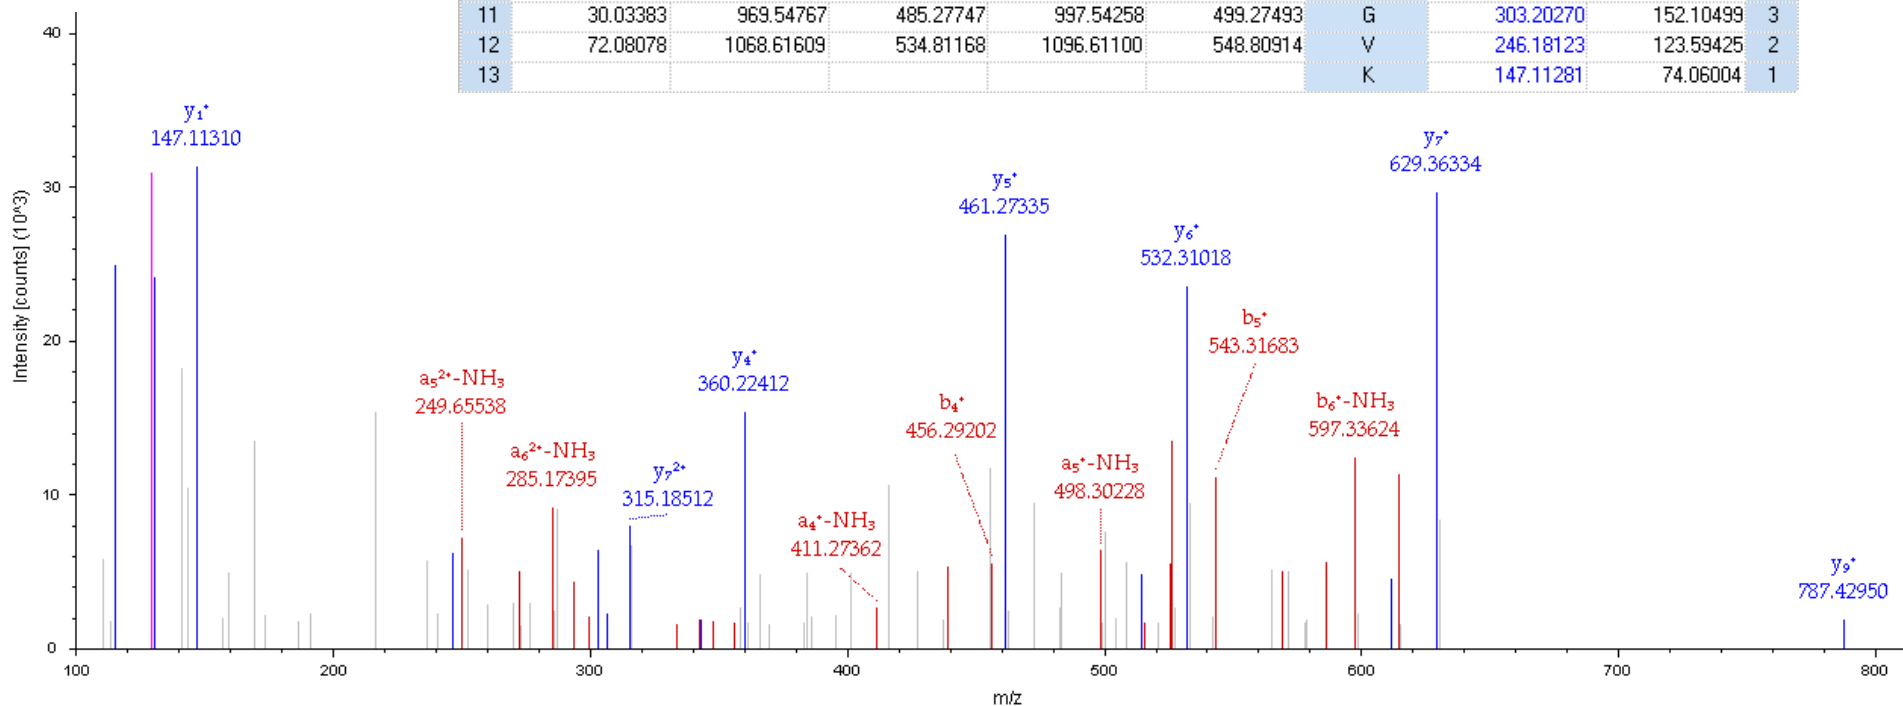

# AUP sample #112

| Accession | Description                  | Sequence      | Modifications  |
|-----------|------------------------------|---------------|----------------|
| Q16695    | Histone H3.1t - [H31T_HUMAN] | VArKSAPATGGVK | R3(Deamidated) |

Histone H3.1t peptide identified with the algorithm Andromeda using the MaxQuant software tool

Raw file: 1DLC022015QE\_NET\_#112\_S1\_rep3  
 Scan: 3498  
 Method: FTMS; HCD  
 Score: 66.99  
 m/z: 414.91  
 Gene names: HIST3H3

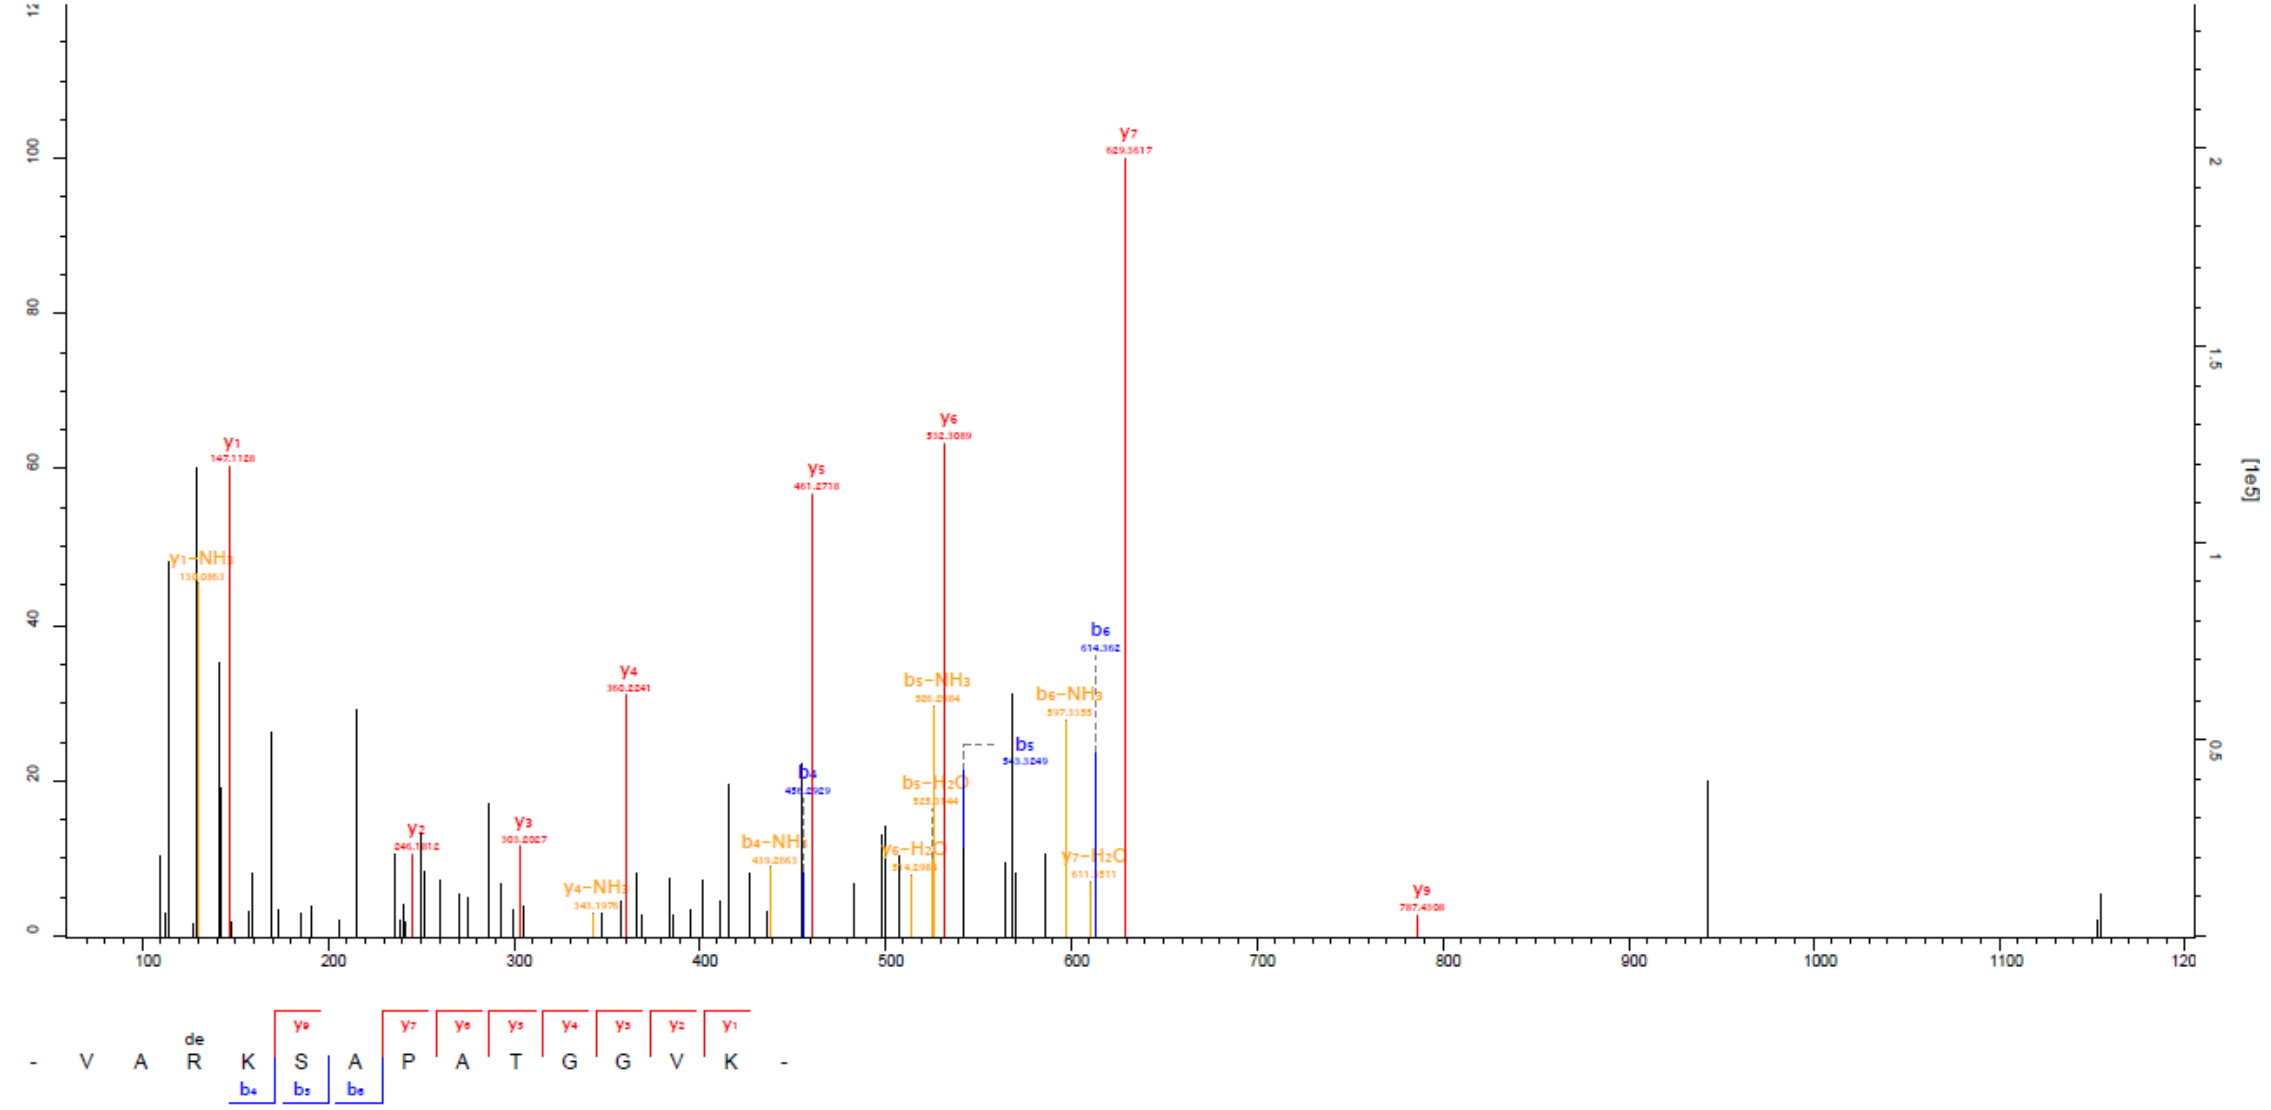

# AUP sample #112

Sequence: ERSGVSLAALK, R2-Deamidated (0.98402 Da)

Charge: +2, Monoisotopic m/z: 566.32544 Da (+3.37 mmu/+5.94 ppm), MH+: 1131.64360 Da, RT: 65.30 min,

Identified with: Sequest HT (v1.3); XCorr:2.51, Ions matched by search engine: 0/0

Fragment match tolerance used for search: 0.02 Da

Fragments used for search: b; b-H<sub>2</sub>O; b-NH<sub>3</sub>; y; y-H<sub>2</sub>O; y-NH<sub>3</sub>

Protein references (3):

- Histone H1.3 OS=Homo sapiens GN=HIST1H1D PE=1 SV=2 - [H13\_HUMAN]

- Histone H1.4 OS=Homo sapiens GN=HIST1H1E PE=1 SV=2 - [H14\_HUMAN]

- Histone H1.2 OS=Homo sapiens GN=HIST1H1C PE=1 SV=2 - [H12\_HUMAN]

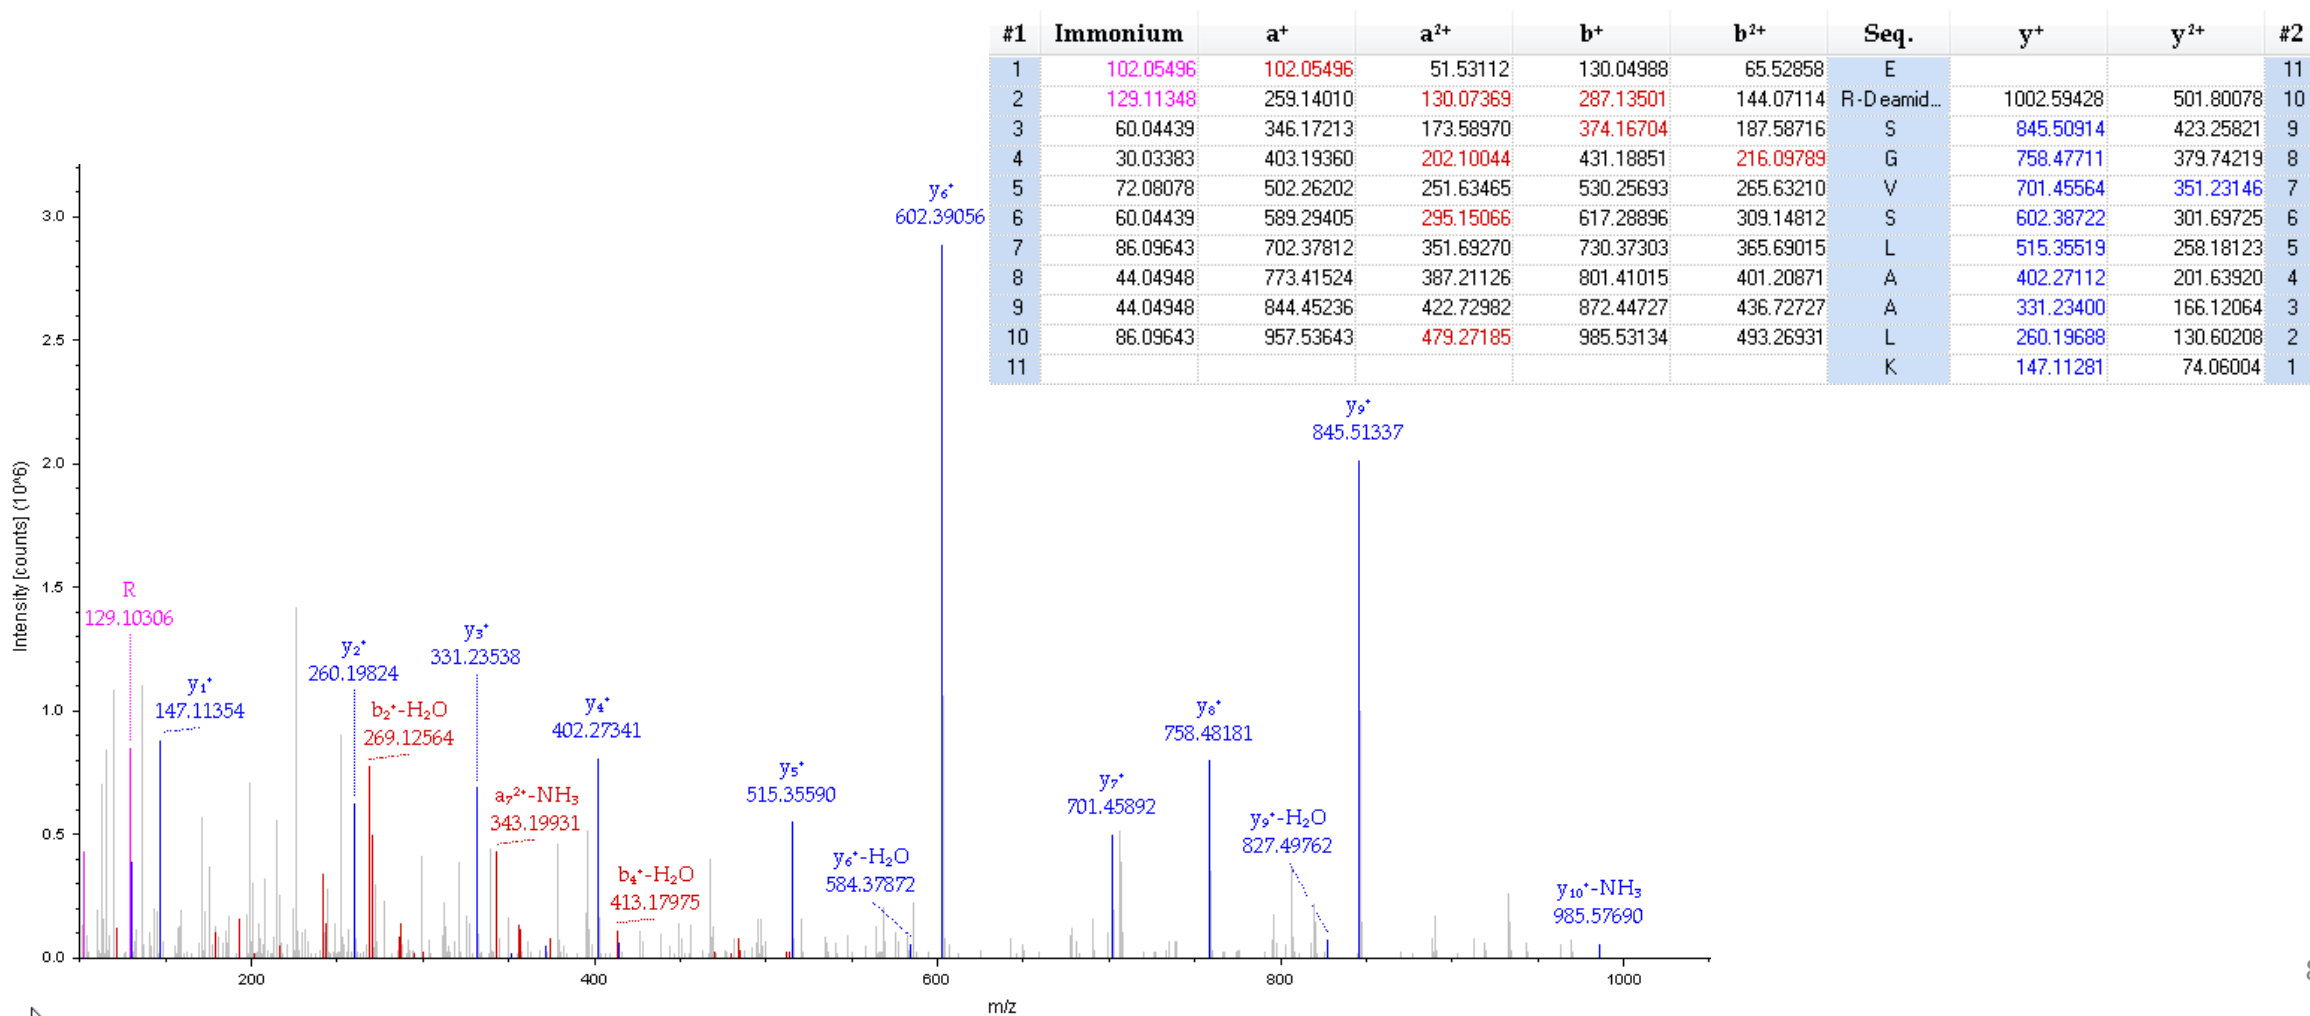



# AUP sample #112

| Accession | Description               |
|-----------|---------------------------|
| P16401    | Histone H1.5 -[H15_HUMAN] |

| Sequence    | Modifications  | XCorr | Charge | MH+ [Da]  | $\Delta M$ [ppm] | # Missed Cleavages |
|-------------|----------------|-------|--------|-----------|------------------|--------------------|
| ErNGLSLAALK | R2(Deamidated) | 2.80  | 2      | 1172.6653 | 1.62             | 1                  |

| #1 | b <sup>+</sup> | b <sup>2+</sup> | Seq.        | y <sup>+</sup> | y <sup>2+</sup> | #2 |
|----|----------------|-----------------|-------------|----------------|-----------------|----|
| 1  | 130.04988      | 65.52858        | E           |                |                 | 11 |
| 2  | 287.13501      | 144.07114       | R-Deamid... | 1043.62083     | 522.31405       | 10 |
| 3  | 401.17794      | 201.09261       | N           | 886.53569      | 443.77148       | 9  |
| 4  | 458.19941      | 229.60334       | G           | 772.49276      | 386.75002       | 8  |
| 5  | 571.28348      | 286.14538       | L           | 715.47129      | 358.23928       | 7  |
| 6  | 658.31551      | 329.66139       | S           | 602.38722      | 301.69725       | 6  |
| 7  | 771.39958      | 386.20343       | L           | 515.35519      | 258.18123       | 5  |
| 8  | 842.43670      | 421.72199       | A           | 402.27112      | 201.63920       | 4  |
| 9  | 913.47382      | 457.24055       | A           | 331.23400      | 166.12064       | 3  |
| 10 | 1026.55789     | 513.78258       | L           | 260.19688      | 130.60208       | 2  |
| 11 |                |                 | K           | 147.11281      | 74.06004        | 1  |

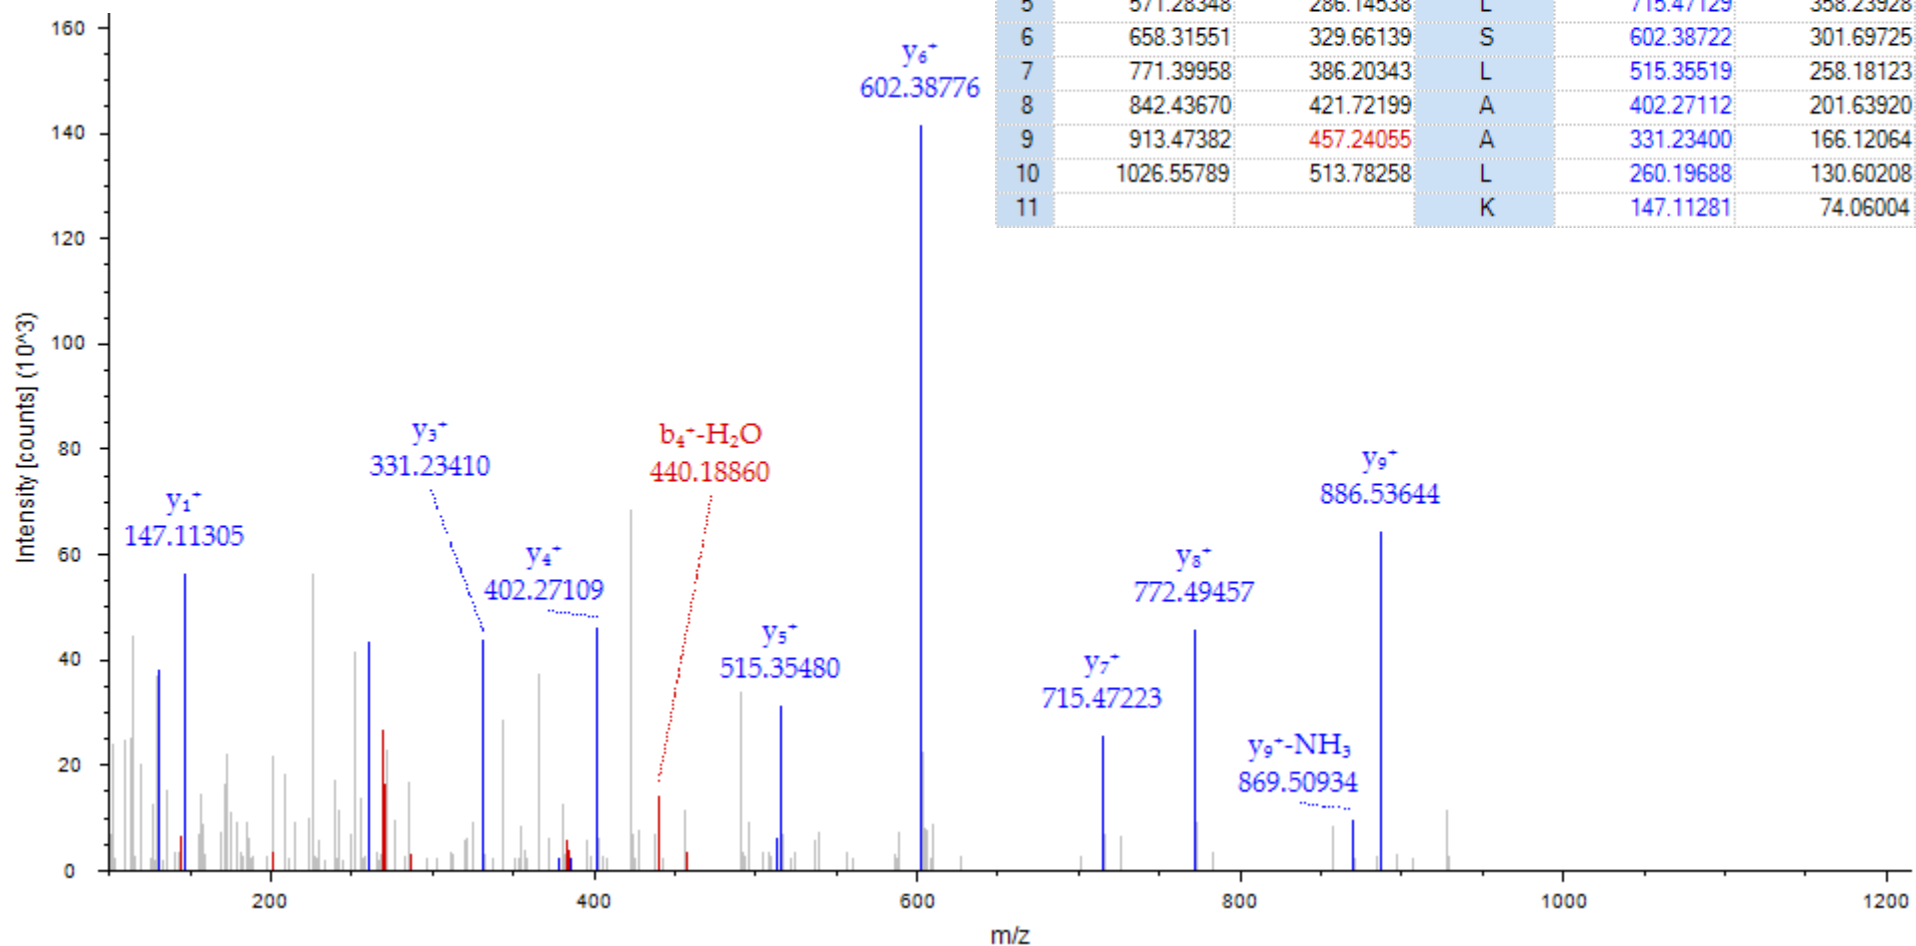

# AUP sample #112

| Accession | Description                |
|-----------|----------------------------|
| P16401    | Histone H1.5 - [H15_HUMAN] |

| Sequence    | Modifications                  | XCorr | Charge | MH+ [Da]  | $\Delta M$ [ppm] | # Missed Cleavages |
|-------------|--------------------------------|-------|--------|-----------|------------------|--------------------|
| ErnGLSLAALK | R2(Deamidated); N3(Deamidated) | 2.56  | 2      | 1173.6504 | 2.55             | 1                  |

| #1 | b <sup>+</sup> | b <sup>2+</sup> | Seq.        | y <sup>+</sup> | y <sup>2+</sup> | #2 |
|----|----------------|-----------------|-------------|----------------|-----------------|----|
| 1  | 130.04988      | 65.52858        | E           |                |                 | 11 |
| 2  | 287.13501      | 144.07114       | R-Deamid... | 1044.60484     | 522.80606       | 10 |
| 3  | 402.16196      | 201.58462       | N-Deamid... | 887.51971      | 444.26349       | 9  |
| 4  | 459.18343      | 230.09535       | G           | 772.49276      | 386.75002       | 8  |
| 5  | 572.26750      | 286.63739       | L           | 715.47129      | 358.23928       | 7  |
| 6  | 659.29953      | 330.15340       | S           | 602.38722      | 301.69725       | 6  |
| 7  | 772.38360      | 386.69544       | L           | 515.35519      | 258.18123       | 5  |
| 8  | 843.42072      | 422.21400       | A           | 402.27112      | 201.63920       | 4  |
| 9  | 914.45784      | 457.73256       | A           | 331.23400      | 166.12064       | 3  |
| 10 | 1027.54191     | 514.27459       | L           | 260.19688      | 130.60208       | 2  |
| 11 |                |                 | K           | 147.11281      | 74.06004        | 1  |

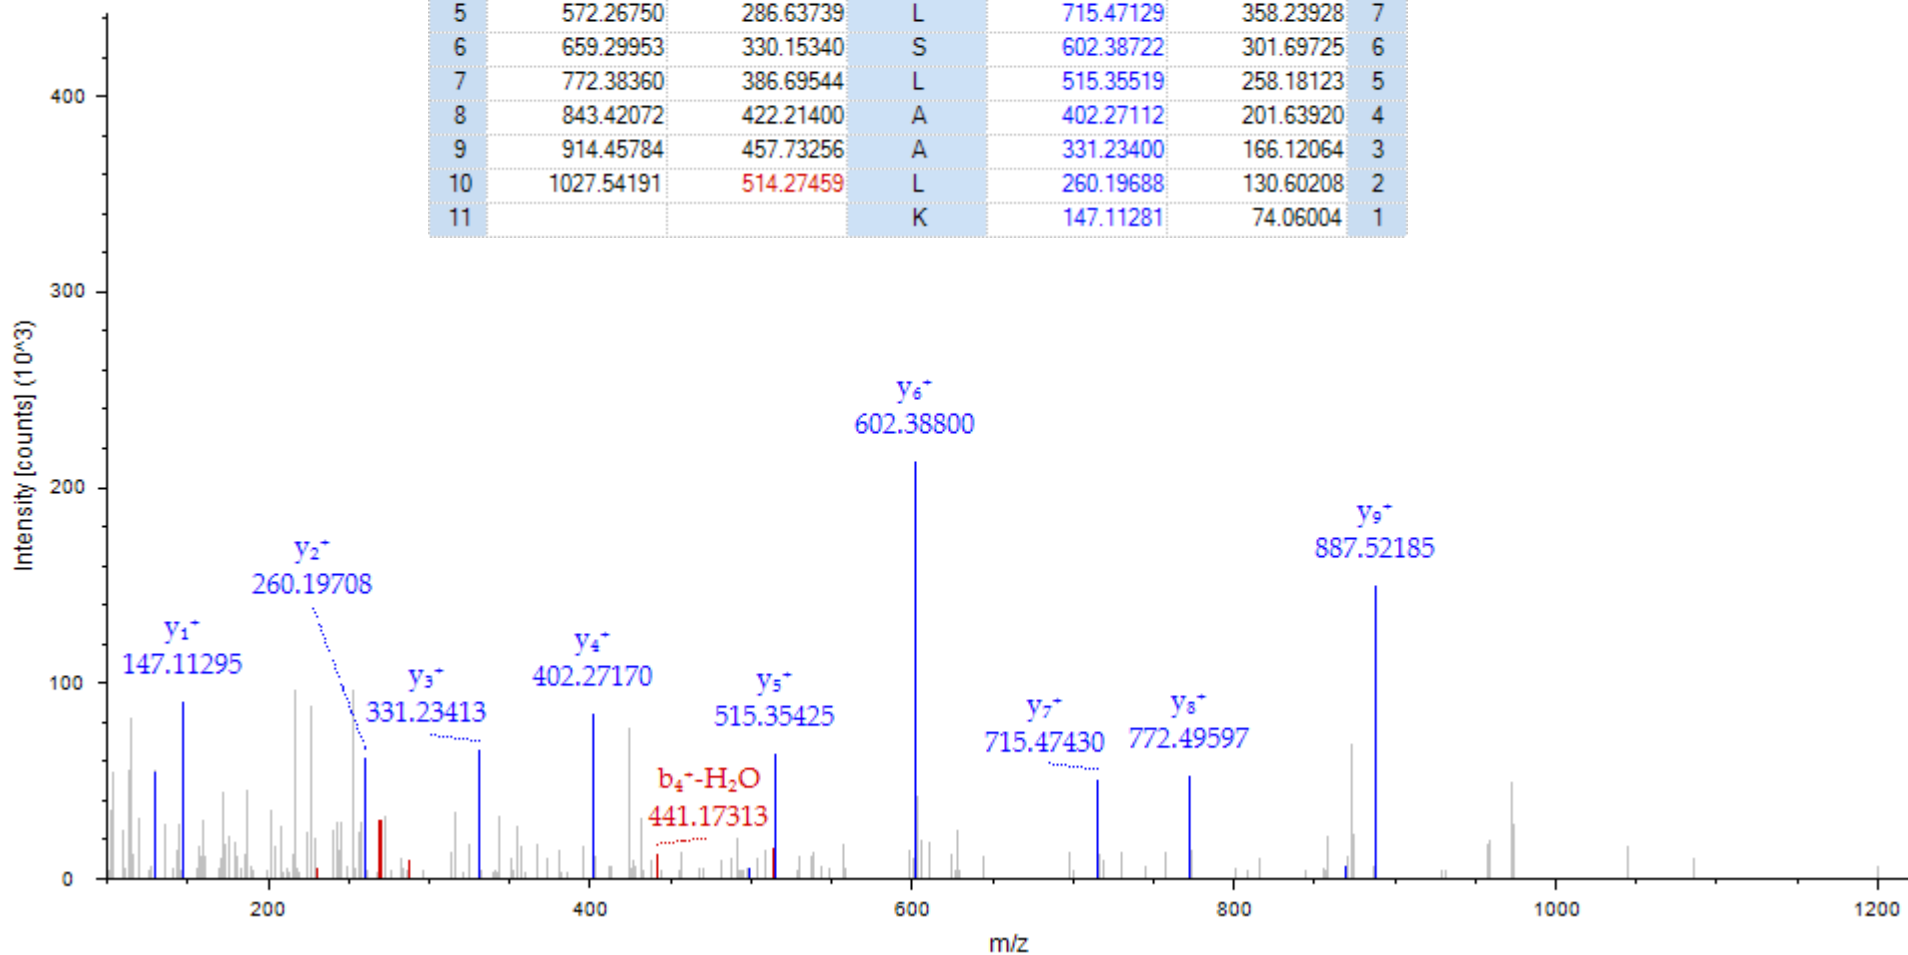

# AUP sample #112

Histone H1.5 peptide identified with the algorithm Andromeda using the MaxQuant software tool

| Accession   | Description                |
|-------------|----------------------------|
| P16401      | Histone H1.5 - [H15_HUMAN] |
| Sequence    | Modifications              |
| ErNGLSLAALK | R2(Deamidated)             |

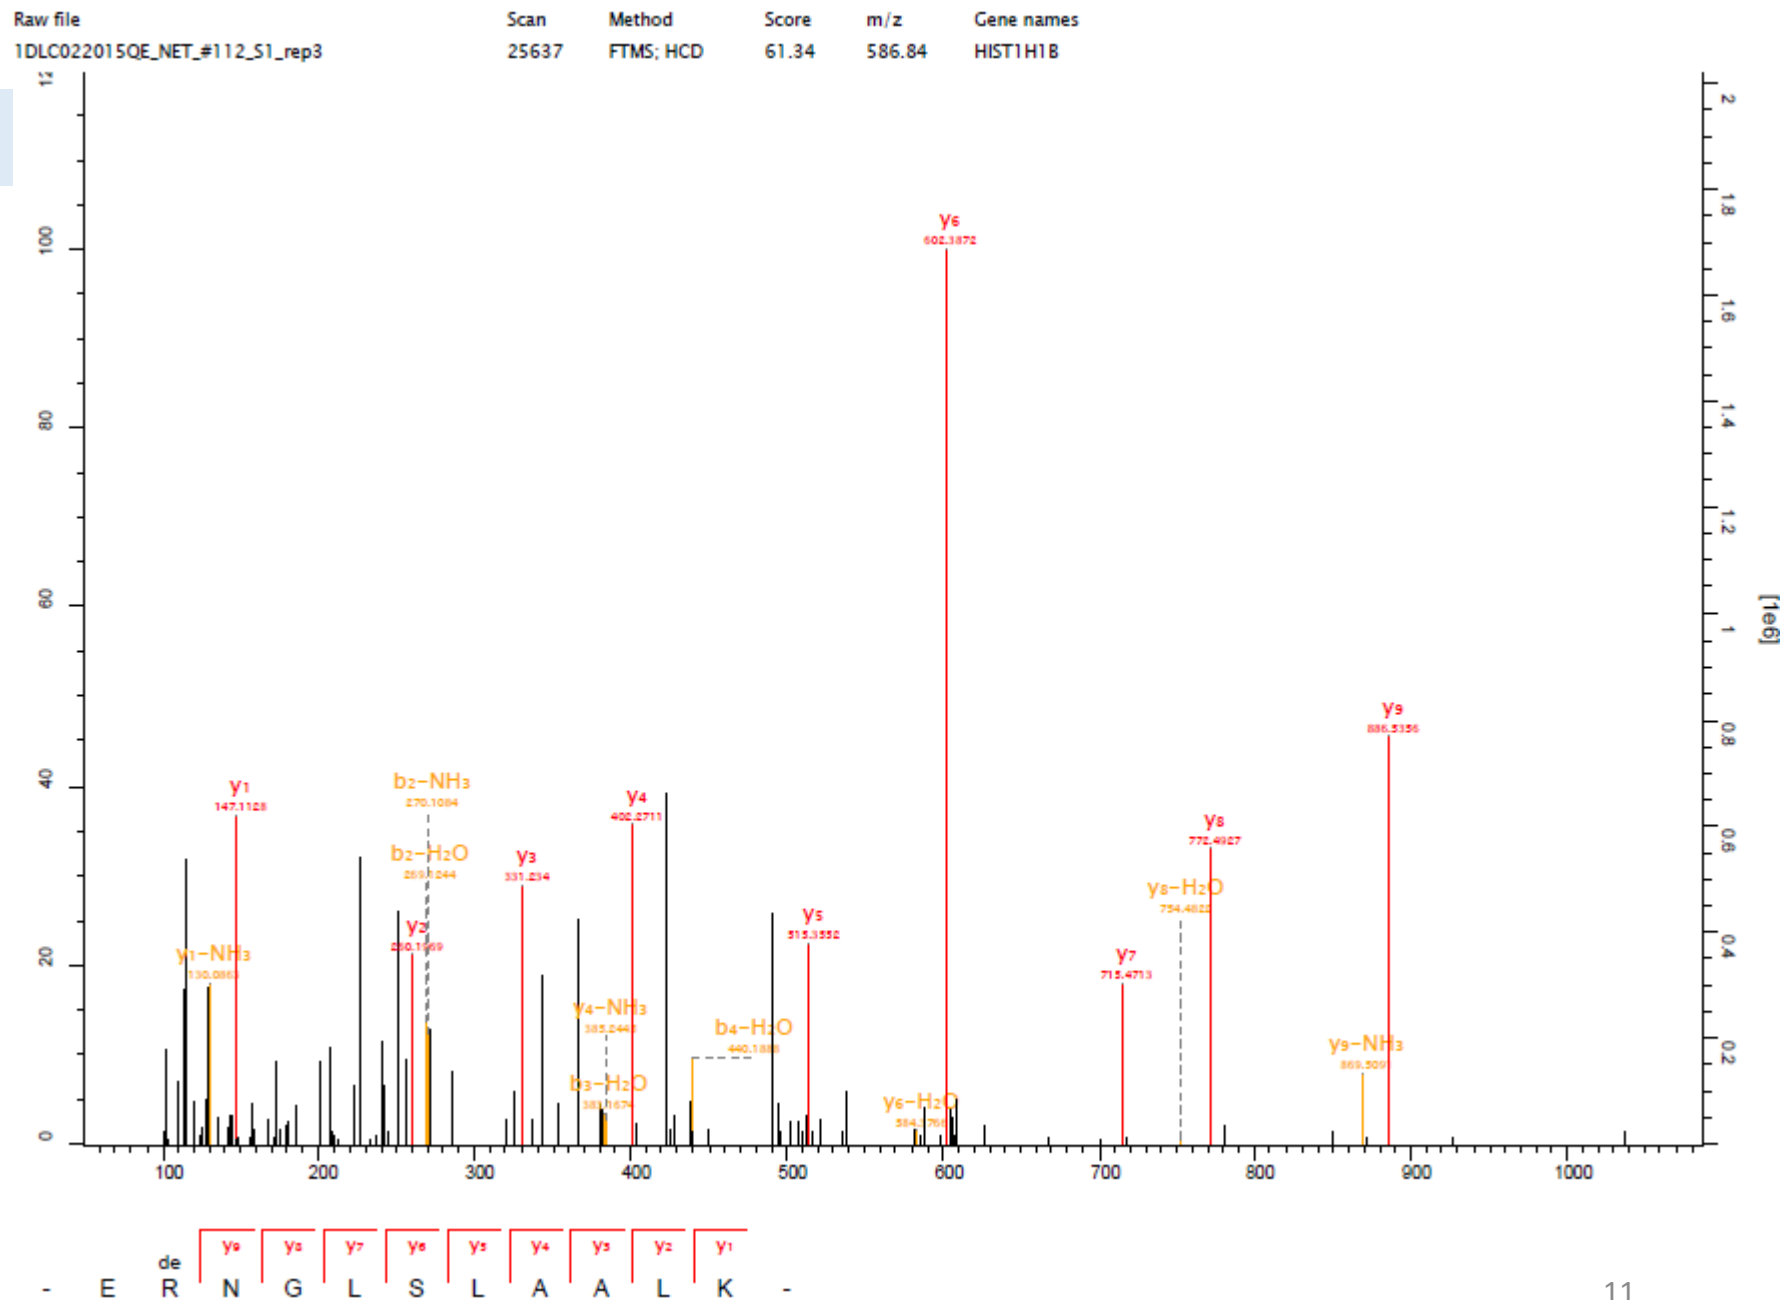

# AUP sample #112

| Accession | Description                |
|-----------|----------------------------|
| P16401    | Histone H1.5 - [H15_HUMAN] |

| Sequence    | Modifications  | XCorr | Charge | MH+ [Da]  | $\Delta M$ [ppm] | # Missed Cleavages |
|-------------|----------------|-------|--------|-----------|------------------|--------------------|
| ErNGLSLAALK | R2(Deamidated) | 2.80  | 2      | 1172.6653 | 1.62             | 1                  |

| #1 | b <sup>+</sup> | b <sup>2+</sup> | Seq.        | y <sup>+</sup> | y <sup>2+</sup> | #2 |
|----|----------------|-----------------|-------------|----------------|-----------------|----|
| 1  | 130.04988      | 65.52858        | E           |                |                 | 11 |
| 2  | 287.13501      | 144.07114       | R-Deamid... | 1043.62083     | 522.31405       | 10 |
| 3  | 401.17794      | 201.09261       | N           | 886.53569      | 443.77148       | 9  |
| 4  | 458.19941      | 229.60334       | G           | 772.49276      | 386.75002       | 8  |
| 5  | 571.28348      | 286.14538       | L           | 715.47129      | 358.23928       | 7  |
| 6  | 658.31551      | 329.66139       | S           | 602.38722      | 301.69725       | 6  |
| 7  | 771.39958      | 386.20343       | L           | 515.35519      | 258.18123       | 5  |
| 8  | 842.43670      | 421.72199       | A           | 402.27112      | 201.63920       | 4  |
| 9  | 913.47382      | 457.24055       | A           | 331.23400      | 166.12064       | 3  |
| 10 | 1026.55789     | 513.78258       | L           | 260.19688      | 130.60208       | 2  |
| 11 |                |                 | K           | 147.11281      | 74.06004        | 1  |

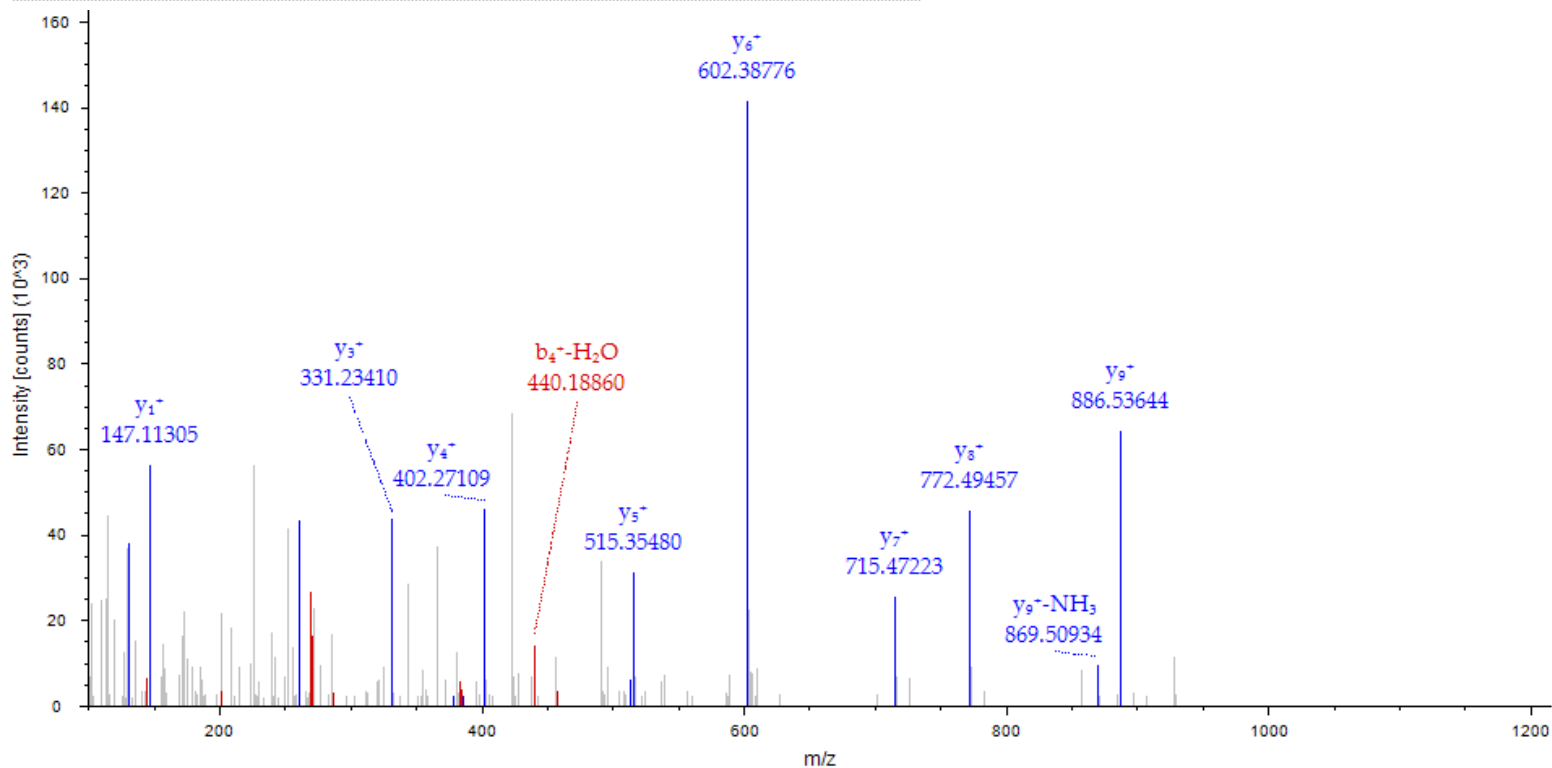

# AUP sample #112

Sequence: GYSFTTTAER(206)EIVR, R10-Deamidated (0.98402 Da)  
 Charge: +2, Monoisotopic m/z: 815.90991 Da (+2.68 mmu/+3.29 ppm), MH+: 1630.81255 Da, RT: 87.03 min,  
 Identified with: Sequest HT (v1.3); XCorr:2.79, Ions matched by search engine: 0/0  
 Fragment match tolerance used for search: 0.02 Da  
 Fragments used for search: b; b-H<sub>2</sub>O; b-NH<sub>3</sub>; y; y-H<sub>2</sub>O; y-NH<sub>3</sub>

*neutral loss peptide*

Protein references (1):  
 - Actin, cytoplasmic 1 OS=Homo sapiens GN=ACTB PE=1 SV=1 - [ACTB\_HUMAN]

| #1 | Immonium  | a <sup>+</sup> | a <sup>2+</sup> | b <sup>+</sup> | b <sup>2+</sup> | Seq.        | y <sup>+</sup> | y <sup>2+</sup> | #2 |
|----|-----------|----------------|-----------------|----------------|-----------------|-------------|----------------|-----------------|----|
| 1  | 30.03383  | 30.03383       | 15.52055        | 58.02875       | 29.51801        | G           |                |                 | 14 |
| 2  | 136.07568 | 193.09715      | 97.05221        | 221.09207      | 111.04967       | Y           | 1573.78572     | 787.39650       | 13 |
| 3  | 60.04439  | 280.12918      | 140.56823       | 308.12410      | 154.56569       | S           | 1410.72240     | 705.86484       | 12 |
| 4  | 120.08078 | 427.19760      | 214.10244       | 455.19252      | 228.09990       | F           | 1323.69037     | 662.34882       | 11 |
| 5  | 74.06004  | 528.24528      | 264.62628       | 556.24020      | 278.62374       | T           | 1176.62195     | 588.81461       | 10 |
| 6  | 74.06004  | 629.29296      | 315.15012       | 657.28788      | 329.14758       | T           | 1075.57427     | 538.29077       | 9  |
| 7  | 74.06004  | 730.34064      | 365.67396       | 758.33556      | 379.67142       | T           | 974.52659      | 487.76693       | 8  |
| 8  | 44.04948  | 801.37776      | 401.19252       | 829.37268      | 415.18998       | A           | 873.47891      | 437.24309       | 7  |
| 9  | 102.05496 | 930.42036      | 465.71382       | 958.41528      | 479.71128       | E           | 802.44179      | 401.72453       | 6  |
| 10 | 129.11348 | 1087.50550     | 544.25639       | 1115.50041     | 558.25384       | R-Deamid... | 673.39919      | 337.20323       | 5  |
| 11 | 102.05496 | 1216.54810     | 608.77769       | 1244.54301     | 622.77514       | E           | 516.31405      | 258.66066       | 4  |
| 12 | 86.09643  | 1329.63217     | 665.31972       | 1357.62708     | 679.31718       | I           | 387.27145      | 194.13936       | 3  |
| 13 | 72.08078  | 1428.70059     | 714.85393       | 1456.69550     | 728.85139       | V           | 274.18738      | 137.59733       | 2  |
| 14 |           |                |                 |                |                 | R           | 175.11896      | 88.06312        | 1  |

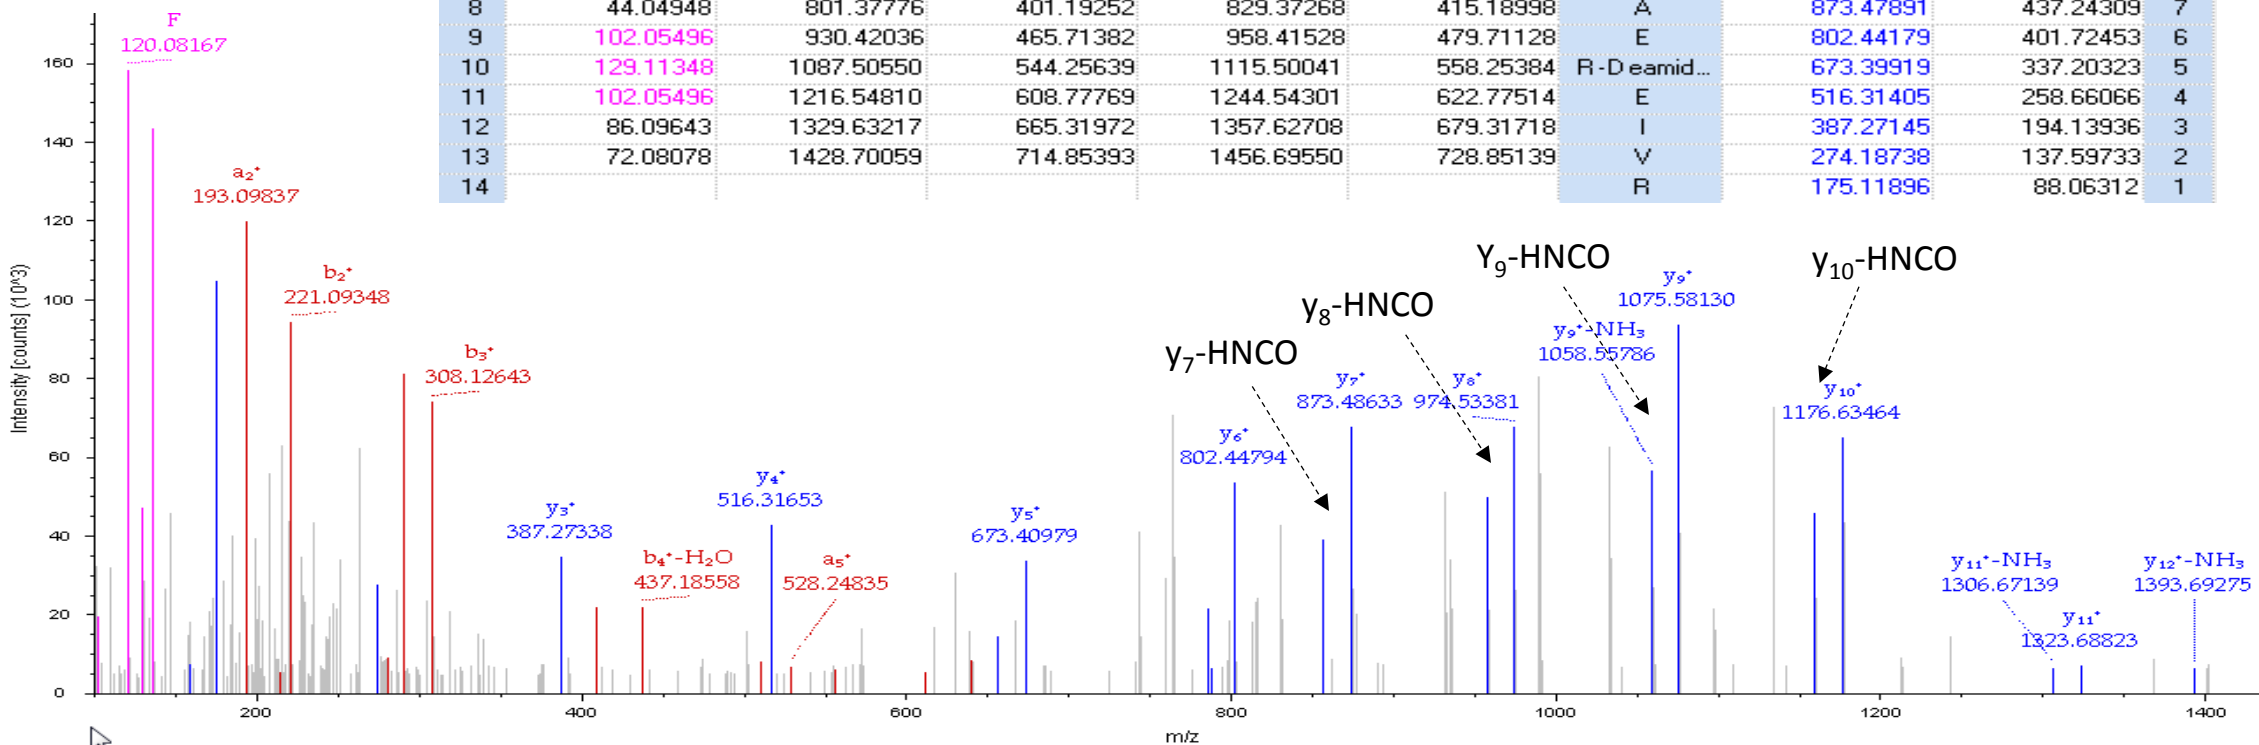

# AUP sample #112

Sequence: **R(62)**GILTLK, R1-Deamidated (0.98402 Da)

Charge: +2, Monoisotopic m/z: 401.26373 Da (+0.44 mmu/+1.1 ppm), MH+: 801.52019 Da, RT: 59.34 min,

Identified with: Sequest HT (v1.3); XCorr:1.83, Ions matched by search engine: 0/0

Fragment match tolerance used for search: 0.02 Da

Fragments used for search: b; b-H<sub>2</sub>O; b-NH<sub>3</sub>; y; y-H<sub>2</sub>O; y-NH<sub>3</sub>

Protein references (1):

- Actin, cytoplasmic 1 OS=Homo sapiens GN=ACTB PE=1 SV=1 - [ACTB\_HUMAN]]

| #1 | Immonium  | a <sup>+</sup> | a <sup>2+</sup> | b <sup>+</sup> | b <sup>2+</sup> | Seq.         | y <sup>+</sup> | y <sup>2+</sup> | #2 |
|----|-----------|----------------|-----------------|----------------|-----------------|--------------|----------------|-----------------|----|
| 1  | 129.11348 | 130.09750      | 65.55239        | 158.09241      | 79.54984        | R-D eamid... |                |                 | 7  |
| 2  | 30.03383  | 187.11897      | 94.06312        | 215.11388      | 108.06058       | G            | 644.43417      | 322.72072       | 6  |
| 3  | 86.09643  | 300.20304      | 150.60516       | 328.19795      | 164.60261       | I            | 587.41270      | 294.20999       | 5  |
| 4  | 86.09643  | 413.28711      | 207.14719       | 441.28202      | 221.14465       | L            | 474.32863      | 237.66795       | 4  |
| 5  | 74.06004  | 514.33479      | 257.67103       | 542.32970      | 271.66849       | T            | 361.24456      | 181.12592       | 3  |
| 6  | 86.09643  | 627.41886      | 314.21307       | 655.41377      | 328.21052       | L            | 260.19688      | 130.60208       | 2  |
| 7  |           |                |                 |                |                 | K            | 147.11281      | 74.06004        | 1  |

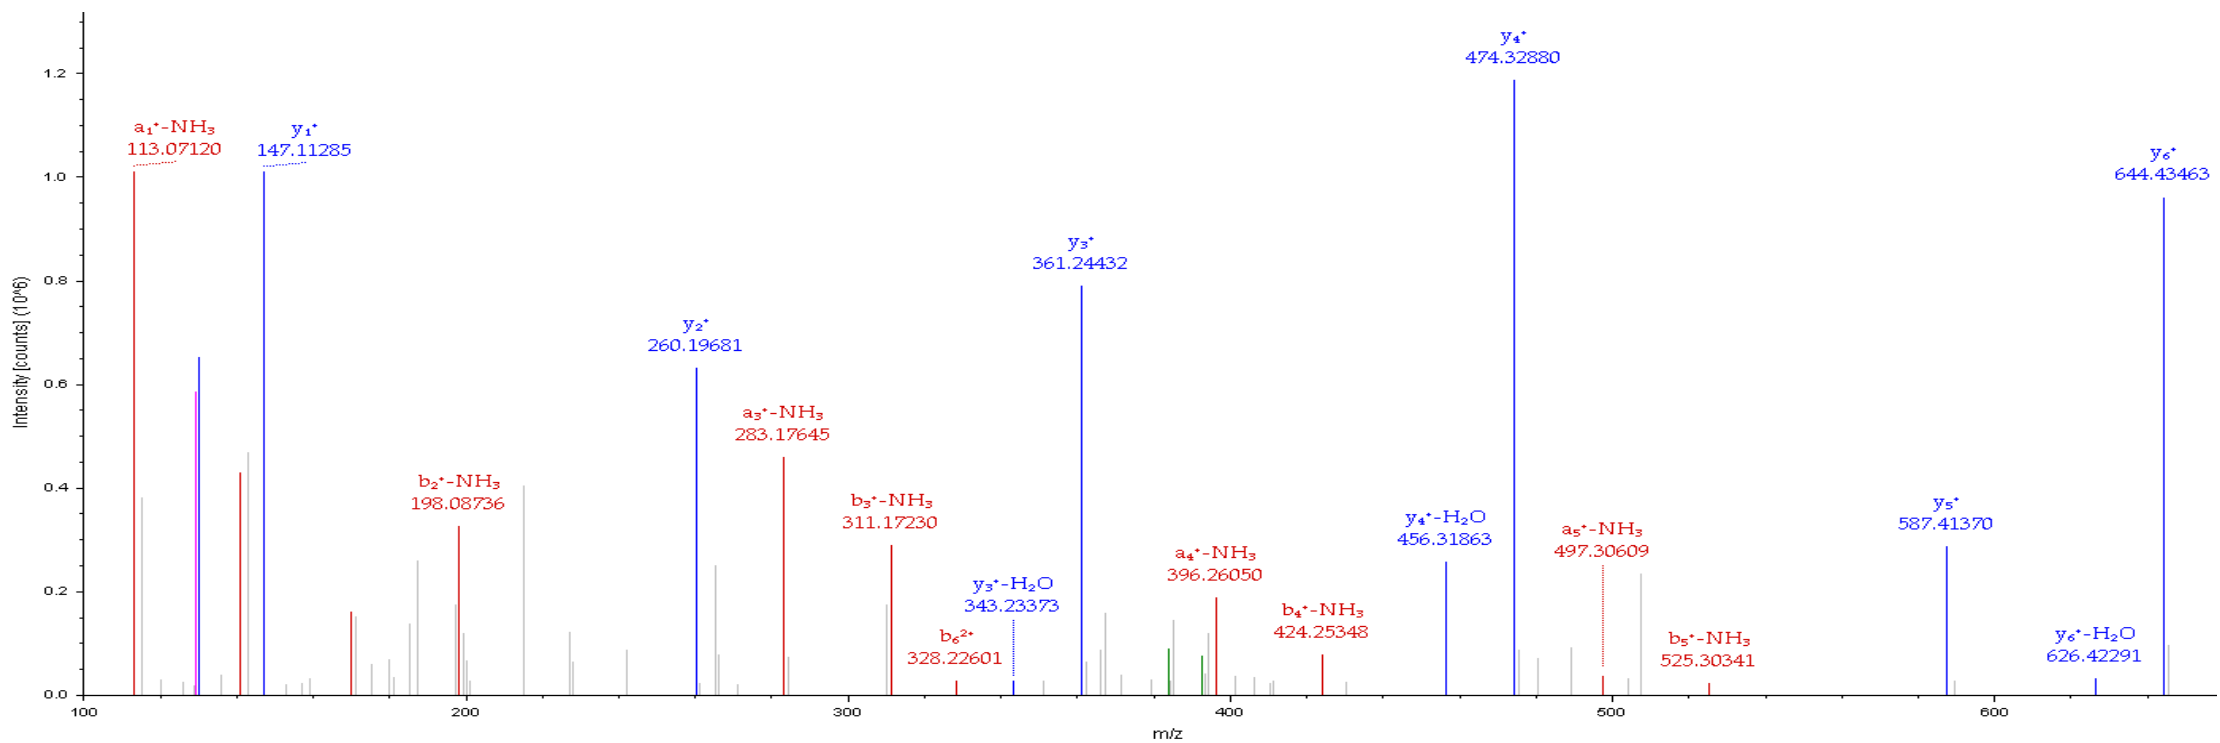

# AUP sample #112

Sequence: RAAPEASGTPSSDAVSR, R1-Deamidated (0.98402 Da)

Charge: +2, Monoisotopic m/z: 830.40466 Da (+4.35 mmu/+5.24 ppm), MH+: 1659.80205 Da, RT: 41.06 min,

Identified with: Sequest HT (v1.3); XCorr:3.05, Ions matched by search engine: 0/0

Fragment match tolerance used for search: 0.02 Da

Fragments used for search: b; b-H<sub>2</sub>O; b-NH<sub>3</sub>; y; y-H<sub>2</sub>O; y-NH<sub>3</sub>

Protein references (1):

- Coronin-1A OS=Homo sapiens GN=CORO1A PE=1 SV=4 - [CORO1A\_HUMAN]

| #1 | Immonium  | a <sup>+</sup> | a <sup>2+</sup> | b <sup>+</sup> | b <sup>2+</sup> | Seq.        | y <sup>+</sup> | y <sup>2+</sup> | #2 |
|----|-----------|----------------|-----------------|----------------|-----------------|-------------|----------------|-----------------|----|
| 1  | 129.11348 | 130.09750      | 65.55239        | 158.09241      | 79.54984        | R-Deamid... |                |                 | 17 |
| 2  | 44.04948  | 201.13462      | 101.07095       | 229.12953      | 115.06840       | A           | 1502.70822     | 751.85775       | 16 |
| 3  | 44.04948  | 272.17174      | 136.58951       | 300.16665      | 150.58696       | A           | 1431.67110     | 716.33919       | 15 |
| 4  | 70.06513  | 369.22451      | 185.11589       | 397.21942      | 199.11335       | P           | 1360.63398     | 680.82063       | 14 |
| 5  | 102.05496 | 498.26711      | 249.63719       | 526.26202      | 263.63465       | E           | 1263.58121     | 632.29424       | 13 |
| 6  | 44.04948  | 569.30423      | 285.15575       | 597.29914      | 299.15321       | A           | 1134.53861     | 567.77294       | 12 |
| 7  | 60.04439  | 656.33626      | 328.67177       | 684.33117      | 342.66922       | S           | 1063.50149     | 532.25438       | 11 |
| 8  | 30.03383  | 713.35773      | 357.18250       | 741.35264      | 371.17996       | G           | 976.46946      | 488.73837       | 10 |
| 9  | 74.06004  | 814.40541      | 407.70634       | 842.40032      | 421.70380       | T           | 919.44799      | 460.22763       | 9  |
| 10 | 70.06513  | 911.45818      | 456.23273       | 939.45309      | 470.23018       | P           | 818.40031      | 409.70379       | 8  |
| 11 | 60.04439  | 998.49021      | 499.74874       | 1026.48512     | 513.74620       | S           | 721.34754      | 361.17741       | 7  |
| 12 | 60.04439  | 1085.52224     | 543.26476       | 1113.51715     | 557.26221       | S           | 634.31551      | 317.66139       | 6  |
| 13 | 88.03931  | 1200.54919     | 600.77823       | 1228.54410     | 614.77569       | D           | 547.28348      | 274.14538       | 5  |
| 14 | 44.04948  | 1271.58631     | 636.29679       | 1299.58122     | 650.29425       | A           | 432.25653      | 216.63190       | 4  |
| 15 | 72.08078  | 1370.65473     | 685.83100       | 1398.64964     | 699.82846       | V           | 361.21941      | 181.11334       | 3  |
| 16 | 60.04439  | 1457.68676     | 729.34702       | 1485.68167     | 743.34447       | S           | 262.15099      | 131.57913       | 2  |
| 17 |           |                |                 |                |                 | R           | 175.11896      | 88.06312        | 1  |

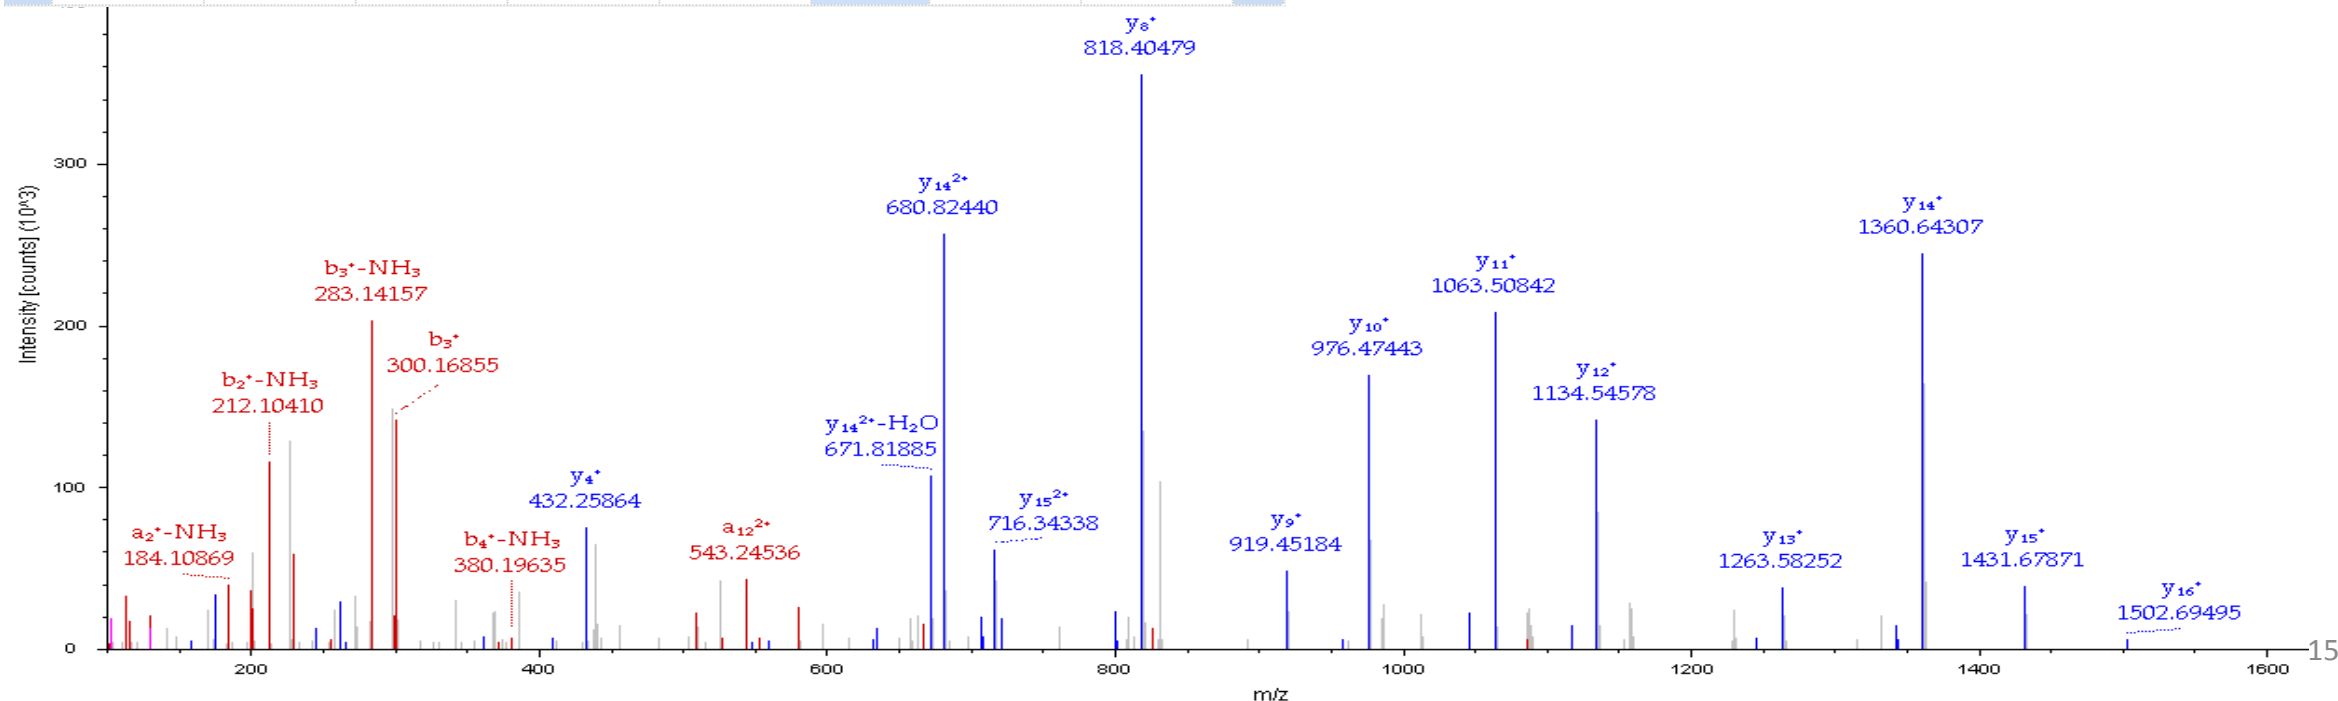

# AUP sample #112

Sequence: SRLGDLYEEEMR, R2-Deamidated (0.98402 Da)

Charge: +2, Monoisotopic m/z: 749.85101 Da (+5.22 mmu/+6.97 ppm), MH+: 1498.69475 Da, RT: 85.96 min,

Identified with: Sequest HT (v1.3); XCorr:2.52, Ions matched by search engine: 0/0

Fragment match tolerance used for search: 0.02 Da

Fragments used for search: b; b-H<sub>2</sub>O; b-NH<sub>3</sub>; y; y-H<sub>2</sub>O; y-NH<sub>3</sub>

Protein references (1):

- Vimentin OS=Homo sapiens GN=VIM PE=1 SV=4 - [VIME\_HUMAN]

| #1 | Immonium  | a <sup>+</sup> | b <sup>+</sup> | Seq.        | y <sup>+</sup> | #2 |
|----|-----------|----------------|----------------|-------------|----------------|----|
| 1  | 60.04439  | 60.04439       | 88.03931       | S           |                | 12 |
| 2  | 129.11348 | 217.12953      | 245.12444      | R-Deamid... | 1411.65228     | 11 |
| 3  | 86.09643  | 330.21360      | 358.20851      | L           | 1254.56714     | 10 |
| 4  | 30.03383  | 387.23507      | 415.22998      | G           | 1141.48307     | 9  |
| 5  | 88.03931  | 502.26202      | 530.25693      | D           | 1084.46160     | 8  |
| 6  | 86.09643  | 615.34609      | 643.34100      | L           | 969.43465      | 7  |
| 7  | 136.07568 | 778.40941      | 806.40432      | Y           | 856.35058      | 6  |
| 8  | 102.05496 | 907.45201      | 935.44692      | E           | 693.28726      | 5  |
| 9  | 102.05496 | 1036.49461     | 1064.48952     | E           | 564.24466      | 4  |
| 10 | 102.05496 | 1165.53721     | 1193.53212     | E           | 435.20206      | 3  |
| 11 | 104.05286 | 1296.57771     | 1324.57262     | M           | 306.15946      | 2  |
| 12 |           |                |                | R           | 175.11896      | 1  |

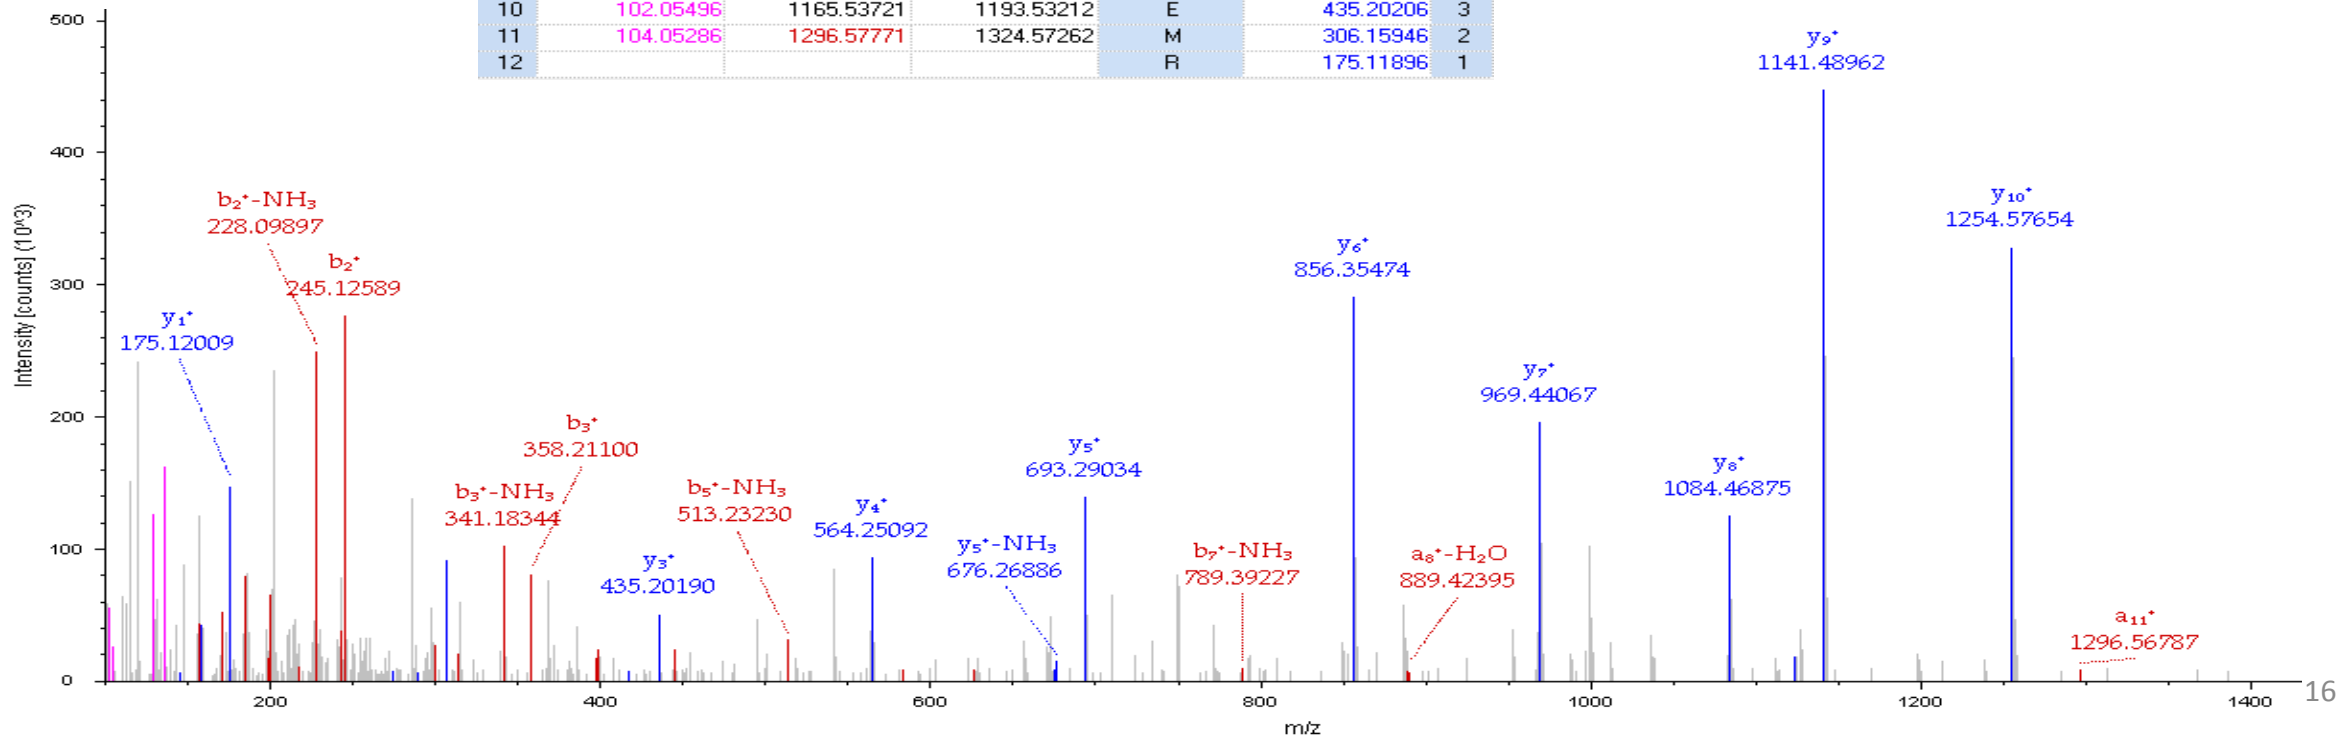



# AUP sample #112

Sequence: MGSRAGGPTTPLSPTR, M1-Oxidation (15.99492 Da), R4-Deamidated (0.98402 Da)  
 Charge: +2, Monoisotopic m/z: 801.89972 Da (+0.82 mmu/+1.02 ppm), MH+: 1602.79216 Da,  
 RT: 34.79 min,  
 Identified with: Sequest HT (v1.3); XCorr:2.99, Ions matched by search engine: 0/0  
 Fragment match tolerance used for search: 0.02 Da  
 Fragments used for search: b; b-H<sub>2</sub>O; b-NH<sub>3</sub>; y; y-H<sub>2</sub>O; y-NH<sub>3</sub>

Protein references (1):

- Lamin-B1 OS=Homo sapiens GN=LMNB1 PE=1 SV=2 - [LMNB1\_HUMAN]

| #1 | Immonium  | a <sup>+</sup> | b <sup>+</sup> | Seq.        | y <sup>+</sup> | #2 |
|----|-----------|----------------|----------------|-------------|----------------|----|
| 1  | 104.05286 | 120.04778      | 148.04269      | M-Oxidation |                | 16 |
| 2  | 30.03383  | 177.06925      | 205.06416      | G           | 1455.75511     | 15 |
| 3  | 60.04439  | 264.10128      | 292.09619      | S           | 1398.73364     | 14 |
| 4  | 129.11348 | 421.18641      | 449.18133      | R-Deamid... | 1311.70161     | 13 |
| 5  | 44.04948  | 492.22353      | 520.21845      | A           | 1154.61647     | 12 |
| 6  | 30.03383  | 549.24500      | 577.23992      | G           | 1083.57935     | 11 |
| 7  | 30.03383  | 606.26647      | 634.26139      | G           | 1026.55788     | 10 |
| 8  | 70.06513  | 703.31924      | 731.31416      | P           | 969.53641      | 9  |
| 9  | 74.06004  | 804.36692      | 832.36184      | T           | 872.48364      | 8  |
| 10 | 74.06004  | 905.41460      | 933.40952      | T           | 771.43596      | 7  |
| 11 | 70.06513  | 1002.46737     | 1030.46229     | P           | 670.38828      | 6  |
| 12 | 86.09643  | 1115.55144     | 1143.54636     | L           | 573.33551      | 5  |
| 13 | 60.04439  | 1202.58347     | 1230.57839     | S           | 460.25144      | 4  |
| 14 | 70.06513  | 1299.63624     | 1327.63116     | P           | 373.21941      | 3  |
| 15 | 74.06004  | 1400.68392     | 1428.67884     | T           | 276.16664      | 2  |
| 16 |           |                |                | R           | 175.11896      | 1  |

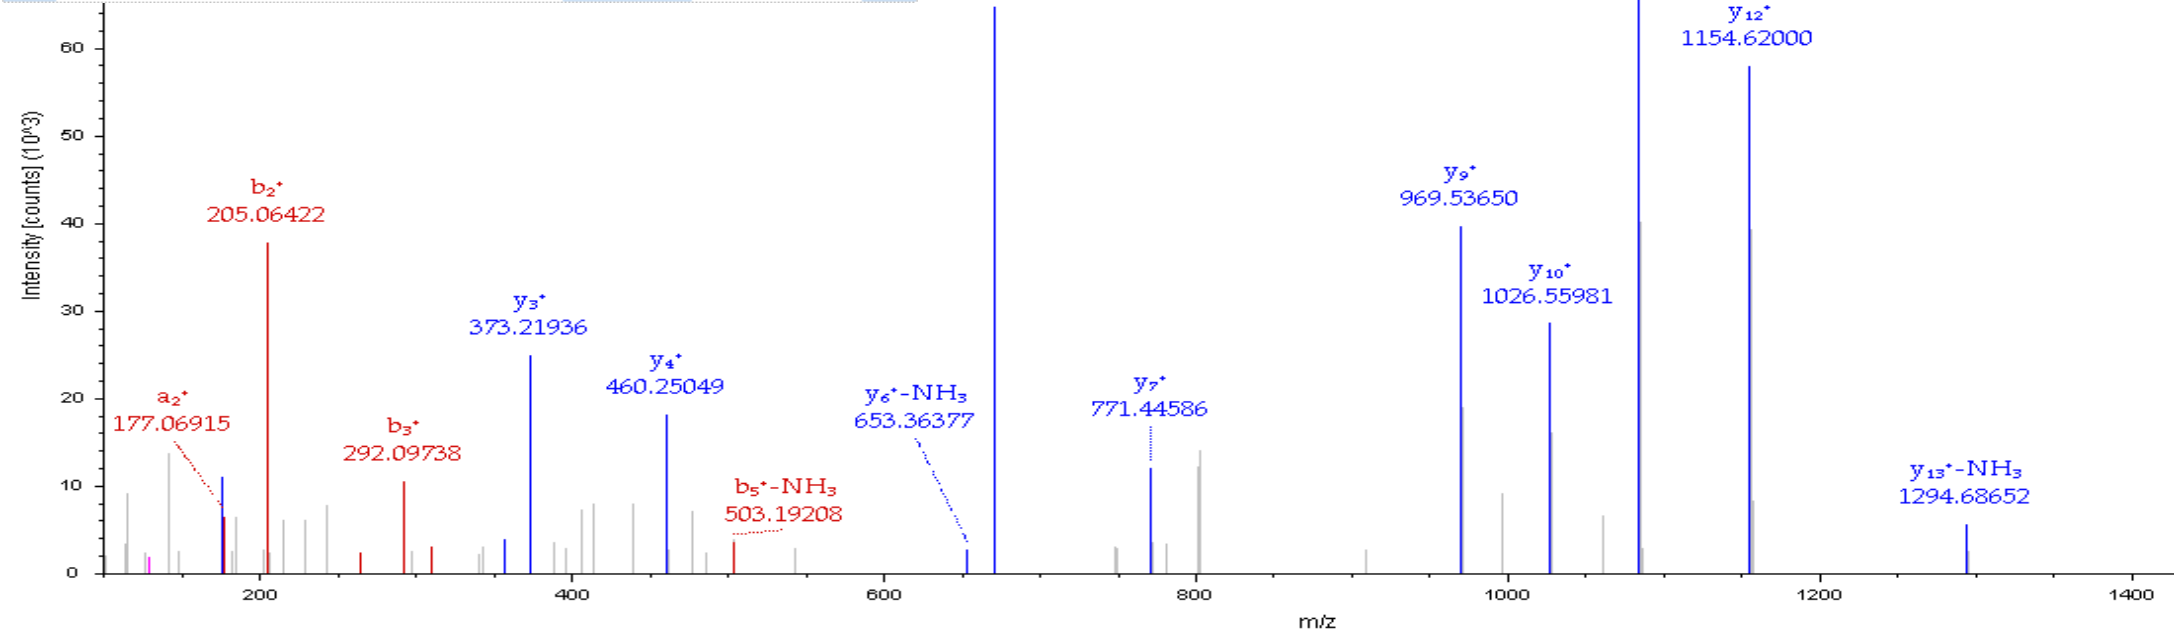

# AUP sample #112

Sequence: LLIYGASTRATGIPAR, R9-Deamidated (0.98402 Da), R16-Deamidated (0.98402 Da)  
 Charge: +2, Monoisotopic m/z: 831.46680 Da (+2.07 mmu/+2.49 ppm), MH+: 1661.92632 Da, RT: 52.10 min,  
 Identified with: Sequest HT (v1.3); XCorr:2.80, Ions matched by search engine: 0/0  
 Fragment match tolerance used for search: 0.02 Da  
 Fragments used for search: b; b-H<sub>2</sub>O; b-NH<sub>3</sub>; y; y-H<sub>2</sub>O; y-NH<sub>3</sub>

Protein references (1):  
 - Ig kappa chain V-III region POM OS=Homo sapiens PE=1 SV=1 - [KV306\_HUMAN]

| #1 | Immonium  | a <sup>+</sup> | a <sup>2+</sup> | b <sup>+</sup> | b <sup>2+</sup> | Seq.        | y <sup>+</sup> | y <sup>2+</sup> | #2 |
|----|-----------|----------------|-----------------|----------------|-----------------|-------------|----------------|-----------------|----|
| 1  | 86.09643  | 86.09643       | 43.55185        | 114.09135      | 57.54931        | L           |                |                 | 16 |
| 2  | 86.09643  | 199.18050      | 100.09389       | 227.17542      | 114.09135       | L           | 1548.83810     | 774.92269       | 15 |
| 3  | 86.09643  | 312.26457      | 156.63592       | 340.25949      | 170.63338       | I           | 1435.75403     | 718.38065       | 14 |
| 4  | 136.07568 | 475.32789      | 238.16758       | 503.32281      | 252.16504       | Y           | 1322.66996     | 661.83862       | 13 |
| 5  | 30.03383  | 532.34936      | 266.67832       | 560.34428      | 280.67578       | G           | 1159.60664     | 580.30696       | 12 |
| 6  | 44.04948  | 603.38648      | 302.19688       | 631.38140      | 316.19434       | A           | 1102.58517     | 551.79622       | 11 |
| 7  | 60.04439  | 690.41851      | 345.71289       | 718.41343      | 359.71035       | S           | 1031.54805     | 516.27766       | 10 |
| 8  | 74.06004  | 791.46619      | 396.23673       | 819.46111      | 410.23419       | T           | 944.51602      | 472.76165       | 9  |
| 9  | 129.11348 | 948.55133      | 474.77930       | 976.54624      | 488.77676       | R-Deamid... | 843.46834      | 422.23781       | 8  |
| 10 | 44.04948  | 1019.58845     | 510.29786       | 1047.58336     | 524.29532       | A           | 686.38321      | 343.69524       | 7  |
| 11 | 74.06004  | 1120.63613     | 560.82170       | 1148.63104     | 574.81916       | T           | 615.34609      | 308.17668       | 6  |
| 12 | 30.03383  | 1177.65760     | 589.33244       | 1205.65251     | 603.32989       | G           | 514.29841      | 257.65284       | 5  |
| 13 | 86.09643  | 1290.74167     | 645.87447       | 1318.73658     | 659.87193       | I           | 457.27694      | 229.14211       | 4  |
| 14 | 70.06513  | 1387.79444     | 694.40086       | 1415.78935     | 708.39831       | P           | 344.19287      | 172.60007       | 3  |
| 15 | 44.04948  | 1458.83156     | 729.91942       | 1486.82647     | 743.91687       | A           | 247.14010      | 124.07369       | 2  |
| 16 |           |                |                 |                |                 | R-Deamid... | 176.10298      | 88.55513        | 1  |

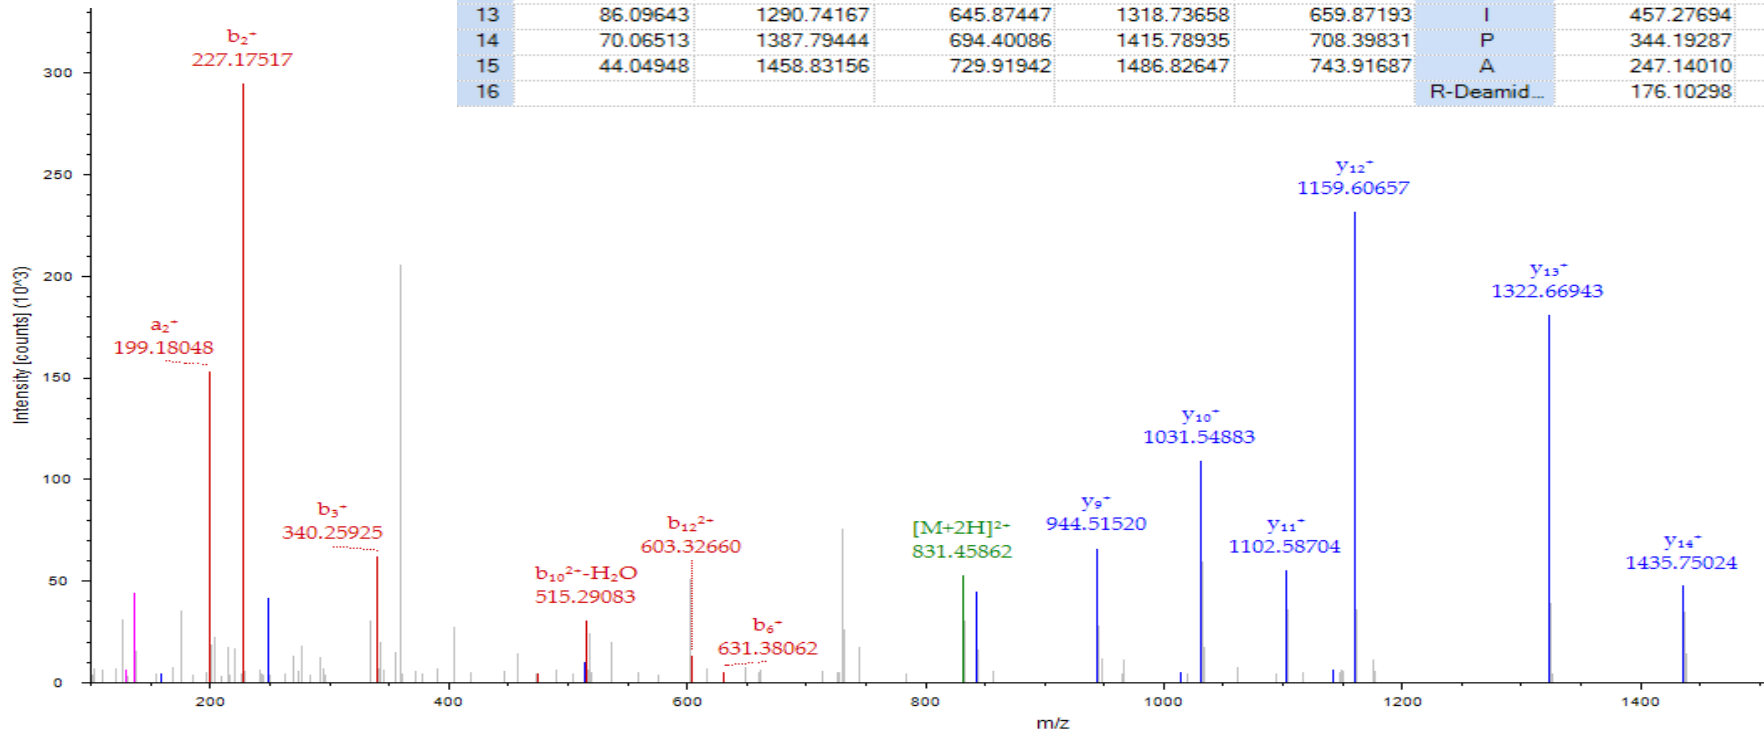

# AUP sample #112

Sequence: SPEDLERLLPHK, R7-Deamidated (0.98402 Da)

Charge: +3, Monoisotopic m/z: 478.92767 Da (+3.23 mmu/+6.75 ppm), MH+: 1434.76847 Da, RT: 63.36 min,

Identified with: Sequest HT (v1.3); XCorr:2.54, Ions matched by search engine: 0/0

Fragment match tolerance used for search: 0.02 Da

Fragments used for search: b; b-H<sub>2</sub>O; b-NH<sub>3</sub>; y; y-H<sub>2</sub>O; y-NH<sub>3</sub>

Protein references (1):

- Glucose-6-phosphate isomerase OS=Homo sapiens GN=GPI PE=1 SV=4 - [G6PI\_HUMAN]

| #1 | Immonium  | a <sup>+</sup> | a <sup>2+</sup> | b <sup>+</sup> | b <sup>2+</sup> | Seq.        | y <sup>+</sup> | y <sup>2+</sup> | #2 |
|----|-----------|----------------|-----------------|----------------|-----------------|-------------|----------------|-----------------|----|
| 1  | 60.04439  | 60.04439       | 30.52583        | 88.03931       | 44.52329        | S           |                |                 | 12 |
| 2  | 70.06513  | 157.09716      | 79.05222        | 185.09208      | 93.04968        | P           | 1347.72676     | 674.36702       | 11 |
| 3  | 102.05496 | 286.13976      | 143.57352       | 314.13468      | 157.57098       | E           | 1250.67399     | 625.84063       | 10 |
| 4  | 88.03931  | 401.16671      | 201.08699       | 429.16163      | 215.08445       | D           | 1121.63139     | 561.31933       | 9  |
| 5  | 86.09643  | 514.25078      | 257.62903       | 542.24570      | 271.62649       | L           | 1006.60444     | 503.80586       | 8  |
| 6  | 102.05496 | 643.29338      | 322.15033       | 671.28830      | 336.14779       | E           | 893.52037      | 447.26382       | 7  |
| 7  | 129.11348 | 800.37852      | 400.69290       | 828.37343      | 414.69035       | R-Deamid... | 764.47777      | 382.74252       | 6  |
| 8  | 86.09643  | 913.46259      | 457.23493       | 941.45750      | 471.23239       | L           | 607.39263      | 304.19995       | 5  |
| 9  | 86.09643  | 1026.54666     | 513.77697       | 1054.54157     | 527.77442       | L           | 494.30856      | 247.65792       | 4  |
| 10 | 70.06513  | 1123.59943     | 562.30335       | 1151.59434     | 576.30081       | P           | 381.22449      | 191.11588       | 3  |
| 11 | 110.07127 | 1260.65834     | 630.83281       | 1288.65325     | 644.83026       | H           | 284.17172      | 142.58950       | 2  |
| 12 |           |                |                 |                |                 | K           | 147.11281      | 74.06004        | 1  |

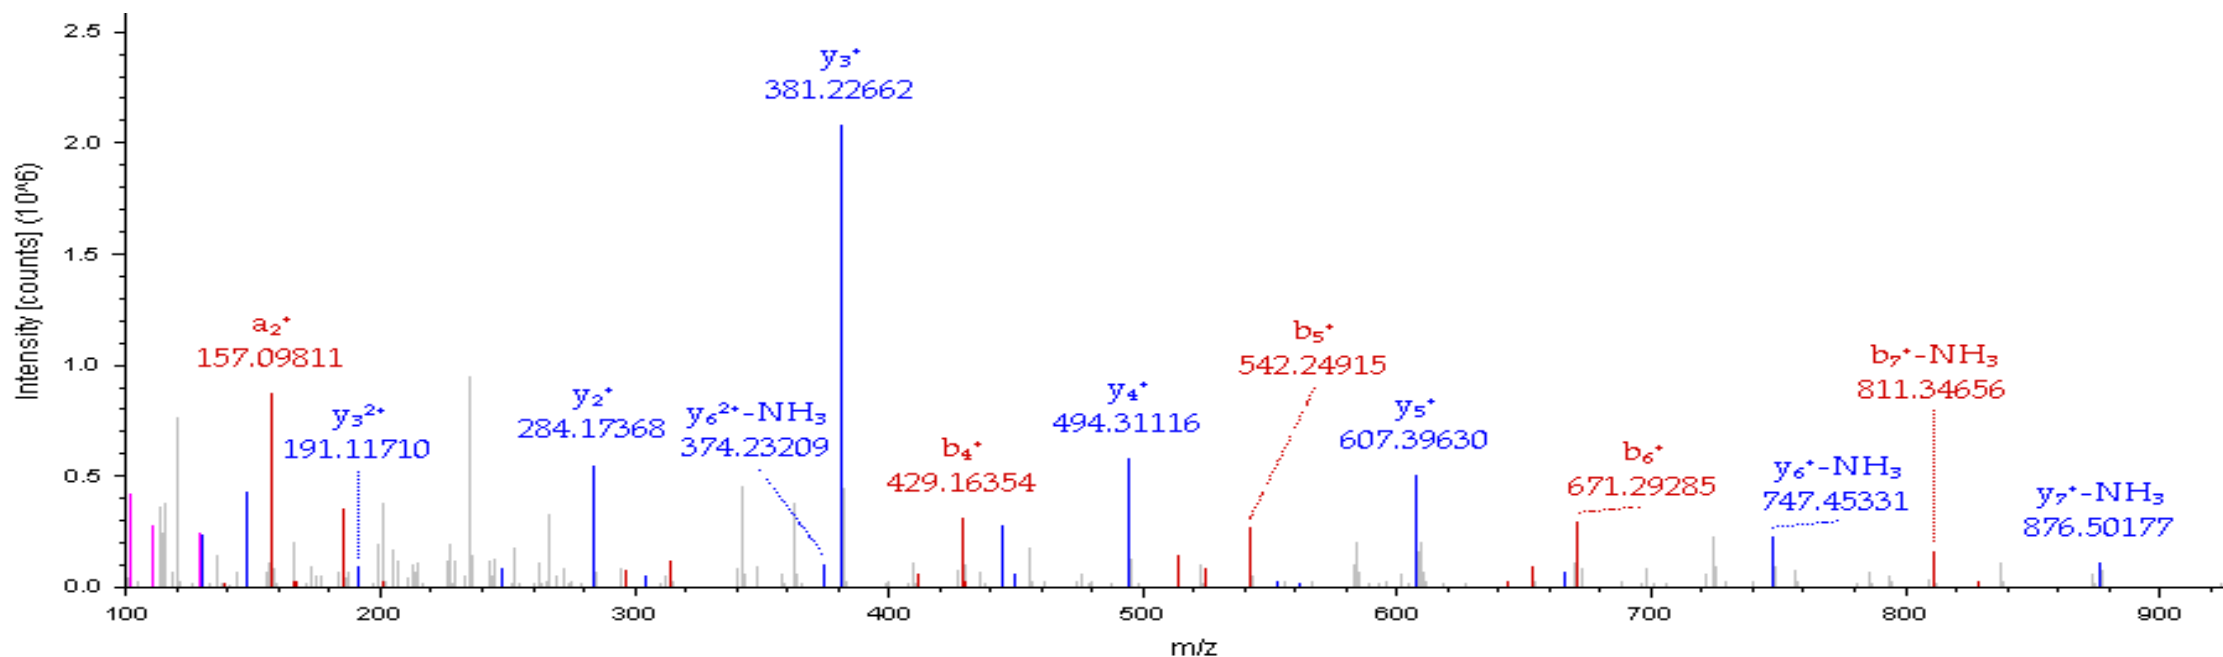

# AUP sample #134

Sequence: MSQLERNIETIINTFHQYSVK, R6-Deamidated (0.98402 Da)  
Charge: +3, Monoisotopic m/z: 851.43512 Da (+3.13 mmu/+3.67 ppm), MH+: 2552.29081 Da, RT: 104.83 min,  
Identified with: Sequest HT (v1.3); XCorr:3.63, Ions matched by search engine: 0/0  
Fragment match tolerance used for search: 0.02 Da  
Fragments used for search: b; b-H<sub>2</sub>O; b-NH<sub>3</sub>; y; y-H<sub>2</sub>O; y-NH<sub>3</sub>

Protein references (1):

- Protein S100-A9 OS=Homo sapiens GN=S100A9 PE=1 SV=1 - [S10A9\_HUMAN]

| #1 | Immonium  | a <sup>+</sup> | a <sup>2+</sup> | b <sup>+</sup> | b <sup>2+</sup> | Seq.      | y <sup>+</sup> | y <sup>2+</sup> | #2 |
|----|-----------|----------------|-----------------|----------------|-----------------|-----------|----------------|-----------------|----|
| 1  | 104.05286 | 104.05286      | 52.53007        | 132.04778      | 66.52753        | M         |                |                 | 21 |
| 2  | 60.04439  | 191.08489      | 96.04608        | 219.07981      | 110.04354       | S         | 2421.24094     | 1211.12411      | 20 |
| 3  | 101.07094 | 319.14347      | 160.07537       | 347.13839      | 174.07283       | Q         | 2334.20891     | 1167.60809      | 19 |
| 4  | 86.09643  | 432.22754      | 216.61741       | 460.22246      | 230.61487       | L         | 2206.15033     | 1103.57880      | 18 |
| 5  | 102.05496 | 561.27014      | 281.13871       | 589.26506      | 295.13617       | E         | 2093.06626     | 1047.03677      | 17 |
| 6  | 129.11348 | 718.35528      | 359.68128       | 746.35019      | 373.67873       | R-Deamid_ | 1964.02366     | 982.51547       | 16 |
| 7  | 87.05529  | 832.39821      | 416.70274       | 860.39312      | 430.70020       | N         | 1806.93852     | 903.97290       | 15 |
| 8  | 86.09643  | 945.48228      | 473.24478       | 973.47719      | 487.24223       | I         | 1692.89559     | 846.95143       | 14 |
| 9  | 102.05496 | 1074.52488     | 537.76608       | 1102.51979     | 551.76353       | E         | 1579.81152     | 790.40940       | 13 |
| 10 | 74.06004  | 1175.57256     | 588.28992       | 1203.56747     | 602.28737       | T         | 1450.76892     | 725.88810       | 12 |
| 11 | 86.09643  | 1288.65663     | 644.83195       | 1316.65154     | 658.82941       | I         | 1349.72124     | 675.36426       | 11 |
| 12 | 86.09643  | 1401.74070     | 701.37399       | 1429.73561     | 715.37144       | I         | 1236.63717     | 618.82222       | 10 |
| 13 | 87.05529  | 1515.78363     | 758.39545       | 1543.77854     | 772.39291       | N         | 1123.55310     | 562.28019       | 9  |
| 14 | 74.06004  | 1616.83131     | 808.91929       | 1644.82622     | 822.91675       | T         | 1009.51017     | 505.25872       | 8  |
| 15 | 120.08078 | 1763.89973     | 882.45350       | 1791.89464     | 896.45096       | F         | 908.46249      | 454.73488       | 7  |
| 16 | 110.07127 | 1900.95864     | 950.98296       | 1928.95355     | 964.98041       | H         | 761.39407      | 381.20067       | 6  |
| 17 | 101.07094 | 2029.01722     | 1015.01225      | 2057.01213     | 1029.00970      | Q         | 624.33516      | 312.67122       | 5  |
| 18 | 136.07568 | 2192.08054     | 1096.54391      | 2220.07545     | 1110.54136      | Y         | 496.27658      | 248.64193       | 4  |
| 19 | 60.04439  | 2279.11257     | 1140.05992      | 2307.10748     | 1154.05738      | S         | 333.21326      | 167.11027       | 3  |
| 20 | 72.08078  | 2378.18099     | 1189.59413      | 2406.17590     | 1203.59159      | V         | 246.18123      | 123.59425       | 2  |
| 21 |           |                |                 |                |                 | K         | 147.11281      | 74.06004        | 1  |

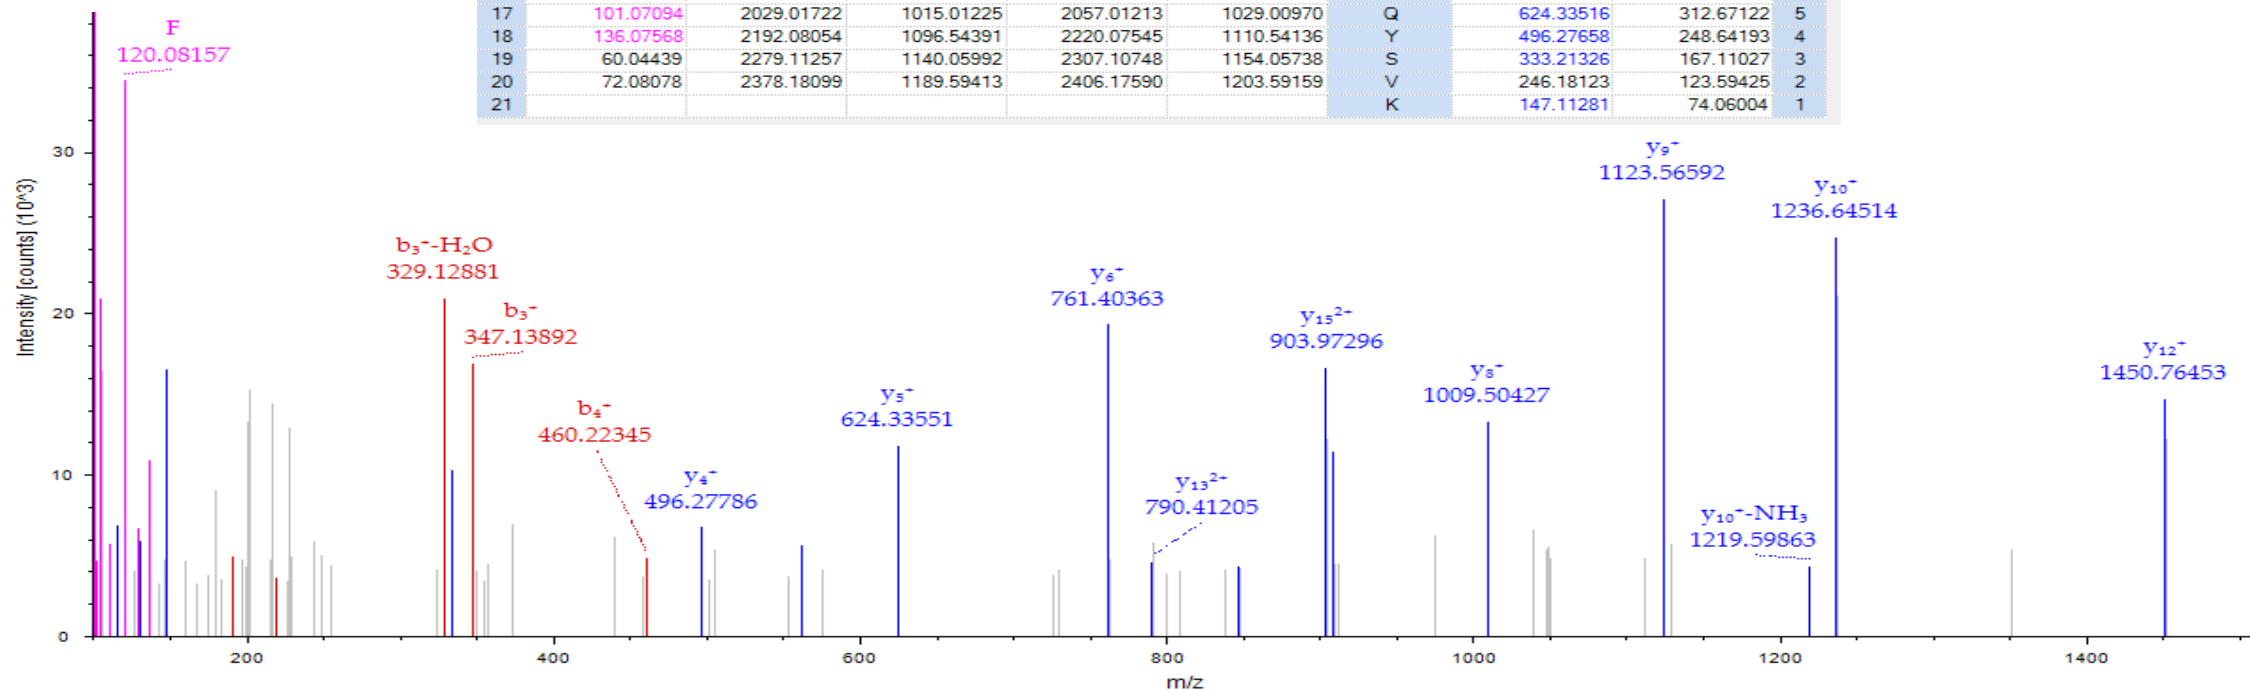

# AUP sample #134

Sequence: VPFSLLRGPSWDPFR, R7-Deamidated (0.98402 Da)

Charge: +2, Monoisotopic m/z: 887.96918 Da (+1.74 mmu/+1.96 ppm), MH+: 1774.93108 Da, RT: 89.74 min,

Identified with: Sequest HT (v1.3); XCorr:2.47, Ions matched by search engine: 0/0

Fragment match tolerance used for search: 0.02 Da

Fragments used for search: b; b-H<sub>2</sub>O; b-NH<sub>3</sub>; y; y-H<sub>2</sub>O; y-NH<sub>3</sub>

Protein references (1):

- Heat shock protein beta-1 OS=Homo sapiens GN=HSPB1 PE=2 SV=1 - [F8WE04\_HUMAN]

| #1 | Immonium  | a <sup>+</sup> | b <sup>+</sup> | Seq.        | y <sup>+</sup> | #2 |
|----|-----------|----------------|----------------|-------------|----------------|----|
| 1  | 72.08078  | 72.08078       | 100.07570      | V           |                | 15 |
| 2  | 70.06513  | 169.13355      | 197.12847      | P           | 1675.85919     | 14 |
| 3  | 120.08078 | 316.20197      | 344.19689      | F           | 1578.80642     | 13 |
| 4  | 60.04439  | 403.23400      | 431.22892      | S           | 1431.73800     | 12 |
| 5  | 86.09643  | 516.31807      | 544.31299      | L           | 1344.70597     | 11 |
| 6  | 86.09643  | 629.40214      | 657.39706      | L           | 1231.62190     | 10 |
| 7  | 129.11348 | 786.48728      | 814.48219      | R-Deamid... | 1118.53783     | 9  |
| 8  | 30.03383  | 843.50875      | 871.50366      | G           | 961.45269      | 8  |
| 9  | 70.06513  | 940.56152      | 968.55643      | P           | 904.43122      | 7  |
| 10 | 60.04439  | 1027.59355     | 1055.58846     | S           | 807.37845      | 6  |
| 11 | 159.09168 | 1213.67287     | 1241.66778     | W           | 720.34642      | 5  |
| 12 | 88.03931  | 1328.69982     | 1356.69473     | D           | 534.26710      | 4  |
| 13 | 70.06513  | 1425.75259     | 1453.74750     | P           | 419.24015      | 3  |
| 14 | 120.08078 | 1572.82101     | 1600.81592     | F           | 322.18738      | 2  |
| 15 |           |                |                | R           | 175.11896      | 1  |

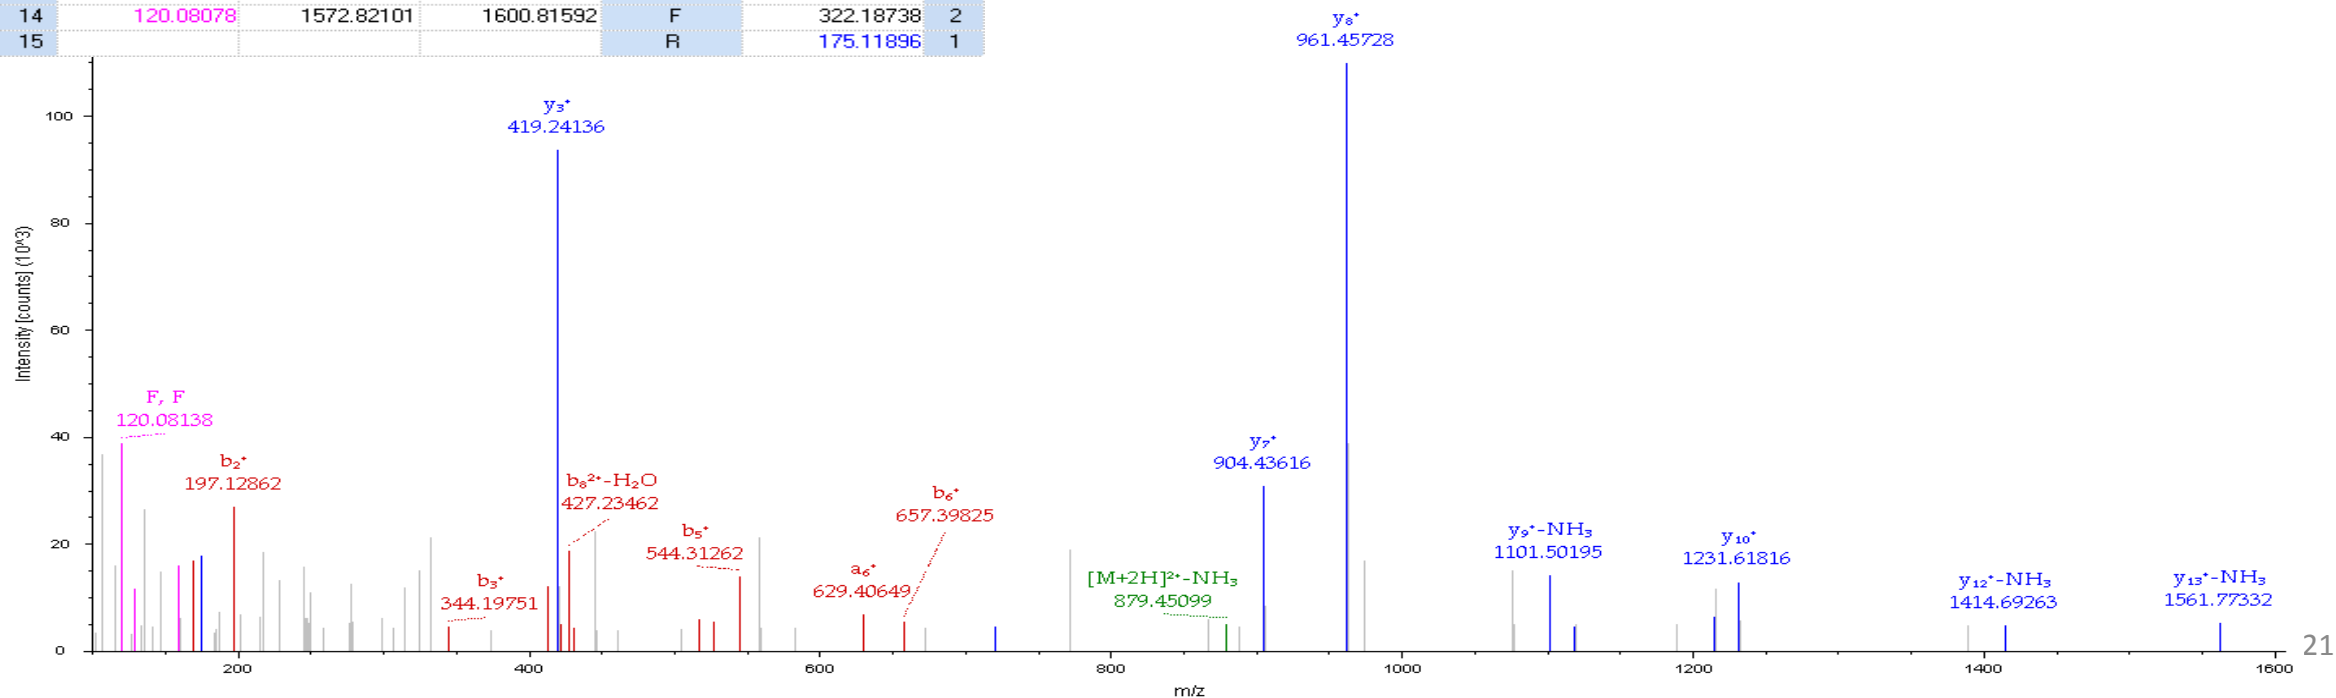

## AUP sample #33

Sequence: LRPVAAEVYGTERR, R2-Deamidated (0.98402 Da)

Charge: +2, Monoisotopic m/z: 731.39270 Da (+4.22 mmu/+5.77 ppm), MH+: 1461.77812 Da, RT: 27.99 min,

Identified with: Sequest HT (v1.3); XCorr:2.27, Ions matched by search engine: 0/0

Fragment match tolerance used for search: 0.02 Da

Fragments used for search: b; b-H<sub>2</sub>O; b-NH<sub>3</sub>; y; y-H<sub>2</sub>O; y-NH<sub>3</sub>

Protein references (1):

- Lactotransferrin OS=Homo sapiens GN=LTF PE=1 SV=6 - [TRFL\_HUMAN]

| #1 | Immonium  | a <sup>+</sup> | a <sup>2+</sup> | b <sup>+</sup> | b <sup>2+</sup> | Seq.        | y <sup>+</sup> | y <sup>2+</sup> | #2 |
|----|-----------|----------------|-----------------|----------------|-----------------|-------------|----------------|-----------------|----|
| 1  | 86.09643  | 86.09643       | 43.55185        | 114.09135      | 57.54931        | L           |                |                 | 13 |
| 2  | 129.11348 | 243.18157      | 122.09442       | 271.17648      | 136.09188       | R-Deamid... | 1348.68562     | 674.84645       | 12 |
| 3  | 70.06513  | 340.23434      | 170.62081       | 368.22925      | 184.61826       | P           | 1191.60048     | 596.30388       | 11 |
| 4  | 72.08078  | 439.30276      | 220.15502       | 467.29767      | 234.15247       | V           | 1094.54771     | 547.77749       | 10 |
| 5  | 44.04948  | 510.33988      | 255.67358       | 538.33479      | 269.67103       | A           | 995.47929      | 498.24328       | 9  |
| 6  | 44.04948  | 581.37700      | 291.19214       | 609.37191      | 305.18959       | A           | 924.44217      | 462.72472       | 8  |
| 7  | 102.05496 | 710.41960      | 355.71344       | 738.41451      | 369.71089       | E           | 853.40505      | 427.20616       | 7  |
| 8  | 72.08078  | 809.48802      | 405.24765       | 837.48293      | 419.24510       | V           | 724.36245      | 362.68486       | 6  |
| 9  | 136.07568 | 972.55134      | 486.77931       | 1000.54625     | 500.77676       | Y           | 625.29403      | 313.15065       | 5  |
| 10 | 30.03383  | 1029.57281     | 515.29004       | 1057.56772     | 529.28750       | G           | 462.23071      | 231.61899       | 4  |
| 11 | 74.06004  | 1130.62049     | 565.81388       | 1158.61540     | 579.81134       | T           | 405.20924      | 203.10826       | 3  |
| 12 | 102.05496 | 1259.66309     | 630.33518       | 1287.65800     | 644.33264       | E           | 304.16156      | 152.58442       | 2  |
| 13 |           |                |                 |                |                 | R           | 175.11896      | 88.06312        | 1  |

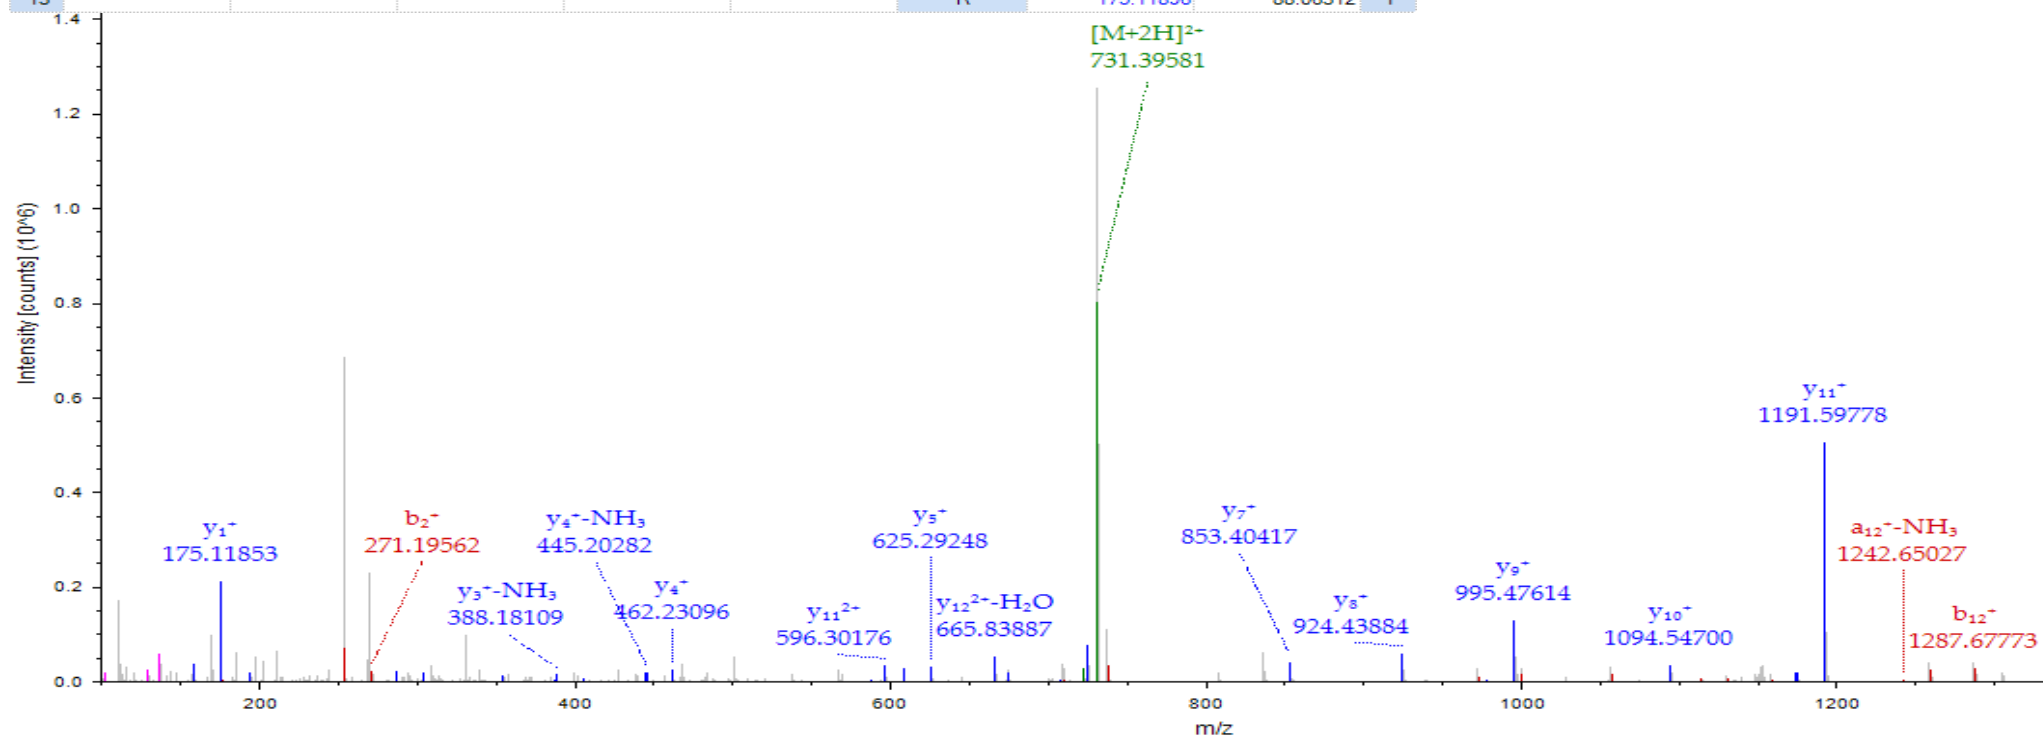

# AUP sample #118

Sequence: RAAPEASGTPSSDAVSR, R1-Deamidated (0.98402 Da)

Charge: +3, Monoisotopic m/z: 553.93597 Da (+0 mmu/+0.01 ppm), MH+: 1659.79337 Da, RT: 16.93 min,

Identified with: Sequest HT (v1.3); XCorr:3.73, Ions matched by search engine: 0/0

Fragment match tolerance used for search: 0.02 Da

Fragments used for search: b; b-H<sub>2</sub>O; b-NH<sub>3</sub>; y; y-H<sub>2</sub>O; y-NH<sub>3</sub>

Protein references (1):

- Coronin-1A OS=Homo sapiens GN=CORO1A PE=1 SV=4 - [CORO1A\_HUMAN]

| #1 | Immonium  | a <sup>+</sup> | a <sup>2+</sup> | b <sup>+</sup> | b <sup>2+</sup> | Seq.        | y <sup>+</sup> | y <sup>2+</sup> | #2 |
|----|-----------|----------------|-----------------|----------------|-----------------|-------------|----------------|-----------------|----|
| 1  | 129.11348 | 130.09750      | 65.55239        | 158.09241      | 79.54984        | R-Deamid... |                |                 | 17 |
| 2  | 44.04948  | 201.13462      | 101.07095       | 229.12953      | 115.06840       | A           | 1502.70822     | 751.85775       | 16 |
| 3  | 44.04948  | 272.17174      | 136.58951       | 300.16665      | 150.58696       | A           | 1431.67110     | 716.33919       | 15 |
| 4  | 70.06513  | 369.22451      | 185.11589       | 397.21942      | 199.11335       | P           | 1360.63398     | 680.82063       | 14 |
| 5  | 102.05496 | 498.26711      | 249.63719       | 526.26202      | 263.63465       | E           | 1263.58121     | 632.29424       | 13 |
| 6  | 44.04948  | 569.30423      | 285.15575       | 597.29914      | 299.15321       | A           | 1134.53861     | 567.77294       | 12 |
| 7  | 60.04439  | 656.33626      | 328.67177       | 684.33117      | 342.66922       | S           | 1063.50149     | 532.25438       | 11 |
| 8  | 30.03383  | 713.35773      | 357.18250       | 741.35264      | 371.17996       | G           | 976.46946      | 488.73837       | 10 |
| 9  | 74.06004  | 814.40541      | 407.70634       | 842.40032      | 421.70380       | T           | 919.44799      | 460.22763       | 9  |
| 10 | 70.06513  | 911.45818      | 456.23273       | 939.45309      | 470.23018       | P           | 818.40031      | 409.70379       | 8  |
| 11 | 60.04439  | 998.49021      | 499.74874       | 1026.48512     | 513.74620       | S           | 721.34754      | 361.17741       | 7  |
| 12 | 60.04439  | 1085.52224     | 543.26476       | 1113.51715     | 557.26221       | S           | 634.31551      | 317.66139       | 6  |
| 13 | 88.03931  | 1200.54919     | 600.77823       | 1228.54410     | 614.77569       | D           | 547.28348      | 274.14538       | 5  |
| 14 | 44.04948  | 1271.58631     | 636.29679       | 1299.58122     | 650.29425       | A           | 432.25653      | 216.63190       | 4  |
| 15 | 72.08078  | 1370.65473     | 685.83100       | 1398.64964     | 699.82846       | V           | 361.21941      | 181.11334       | 3  |
| 16 | 60.04439  | 1457.68676     | 729.34702       | 1485.68167     | 743.34447       | S           | 262.15099      | 131.57913       | 2  |
| 17 |           |                |                 |                |                 | R           | 175.11896      | 88.06312        | 1  |

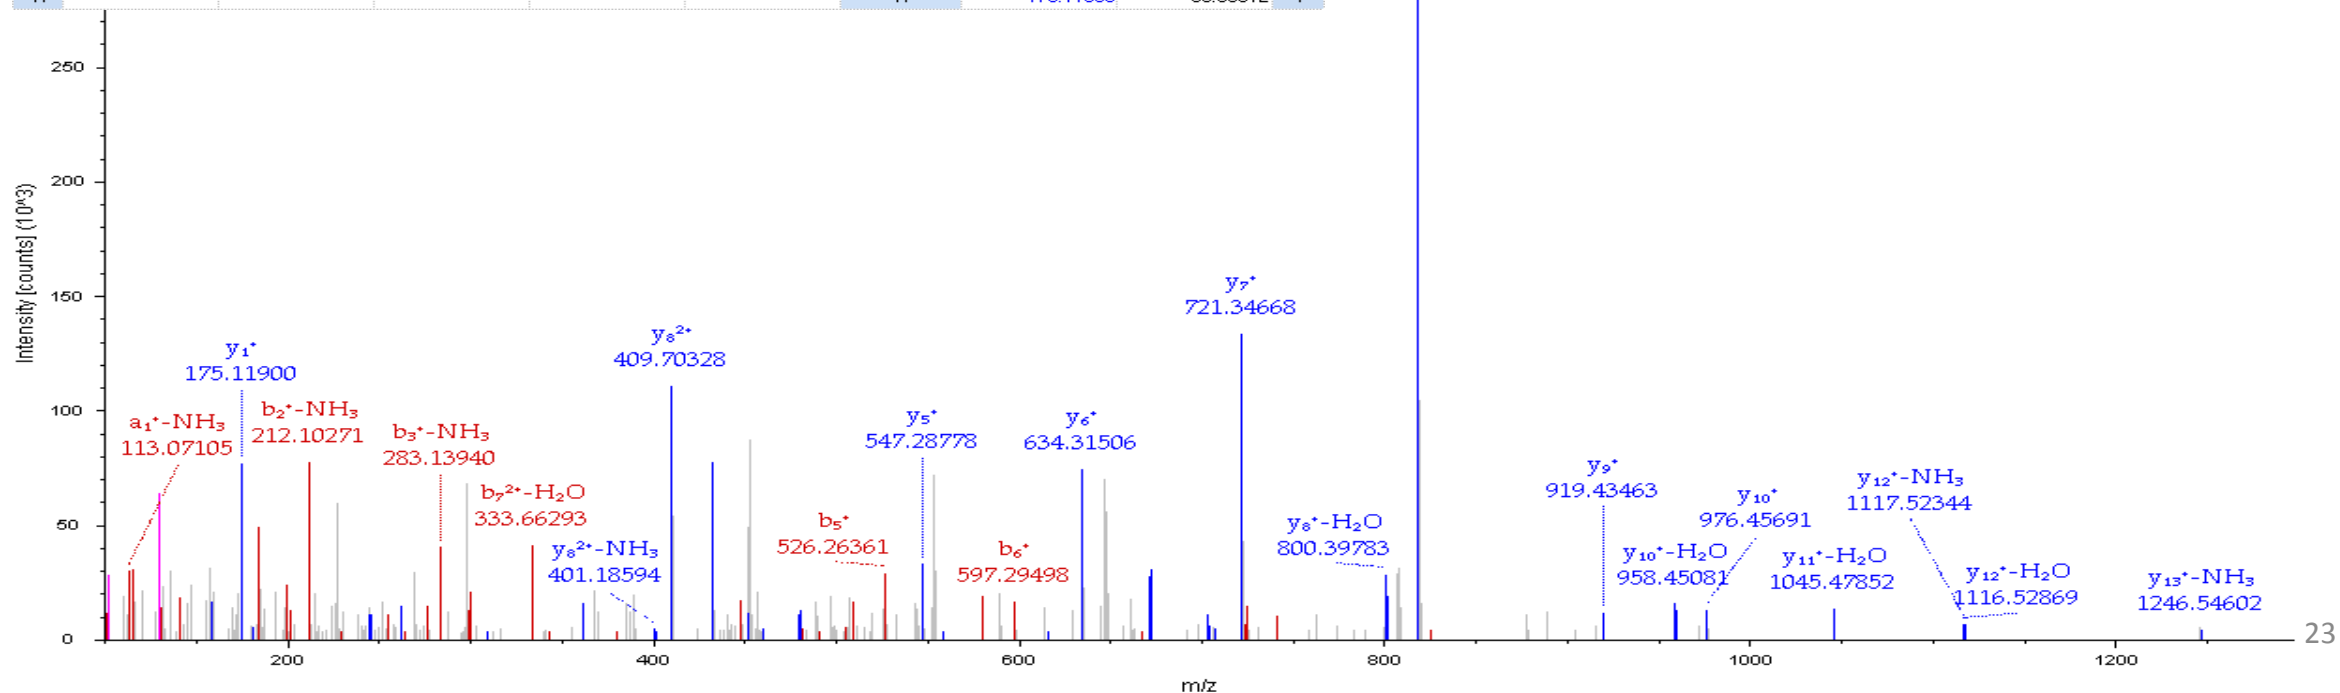

# AUP sample #118

Sequence: SRLGDLYEEEMR, R2-Deamidated (0.98402 Da)

Charge: +2, Monoisotopic m/z: 749.84564 Da (-0.15 mmu/-0.2 ppm), MH+: 1498.68401 Da, RT: 51.71 min,

Identified with: Sequest HT (v1.3); XCorr:3.41, Ions matched by search engine: 0/0

Fragment match tolerance used for search: 0.02 Da

Fragments used for search: b; b-H<sub>2</sub>O; b-NH<sub>3</sub>; y; y-H<sub>2</sub>O; y-NH<sub>3</sub>

Protein references (2):

- Vimentin OS=Homo sapiens GN=VIM PE=1 SV=4 - [VIME\_HUMAN]

| #1 | Immonium  | b <sup>+</sup> | b <sup>2+</sup> | Seq.        | y <sup>+</sup> | y <sup>2+</sup> | #2 |
|----|-----------|----------------|-----------------|-------------|----------------|-----------------|----|
| 1  | 60.04439  | 88.03931       | 44.52329        | S           |                |                 | 12 |
| 2  | 129.11348 | 245.12444      | 123.06586       | R-Deamid... | 1411.65228     | 706.32978       | 11 |
| 3  | 86.09643  | 358.20851      | 179.60789       | L           | 1254.56714     | 627.78721       | 10 |
| 4  | 30.03383  | 415.22998      | 208.11863       | G           | 1141.48307     | 571.24517       | 9  |
| 5  | 88.03931  | 530.25693      | 265.63210       | D           | 1084.46160     | 542.73444       | 8  |
| 6  | 86.09643  | 643.34100      | 322.17414       | L           | 969.43465      | 485.22096       | 7  |
| 7  | 136.07568 | 806.40432      | 403.70580       | Y           | 856.35058      | 428.67893       | 6  |
| 8  | 102.05496 | 935.44692      | 468.22710       | E           | 693.28726      | 347.14727       | 5  |
| 9  | 102.05496 | 1064.48952     | 532.74840       | E           | 564.24466      | 282.62597       | 4  |
| 10 | 102.05496 | 1193.53212     | 597.26970       | E           | 435.20206      | 218.10467       | 3  |
| 11 | 104.05286 | 1324.57262     | 662.78995       | M           | 306.15946      | 153.58337       | 2  |
| 12 |           |                |                 | R           | 175.11896      | 88.06312        | 1  |

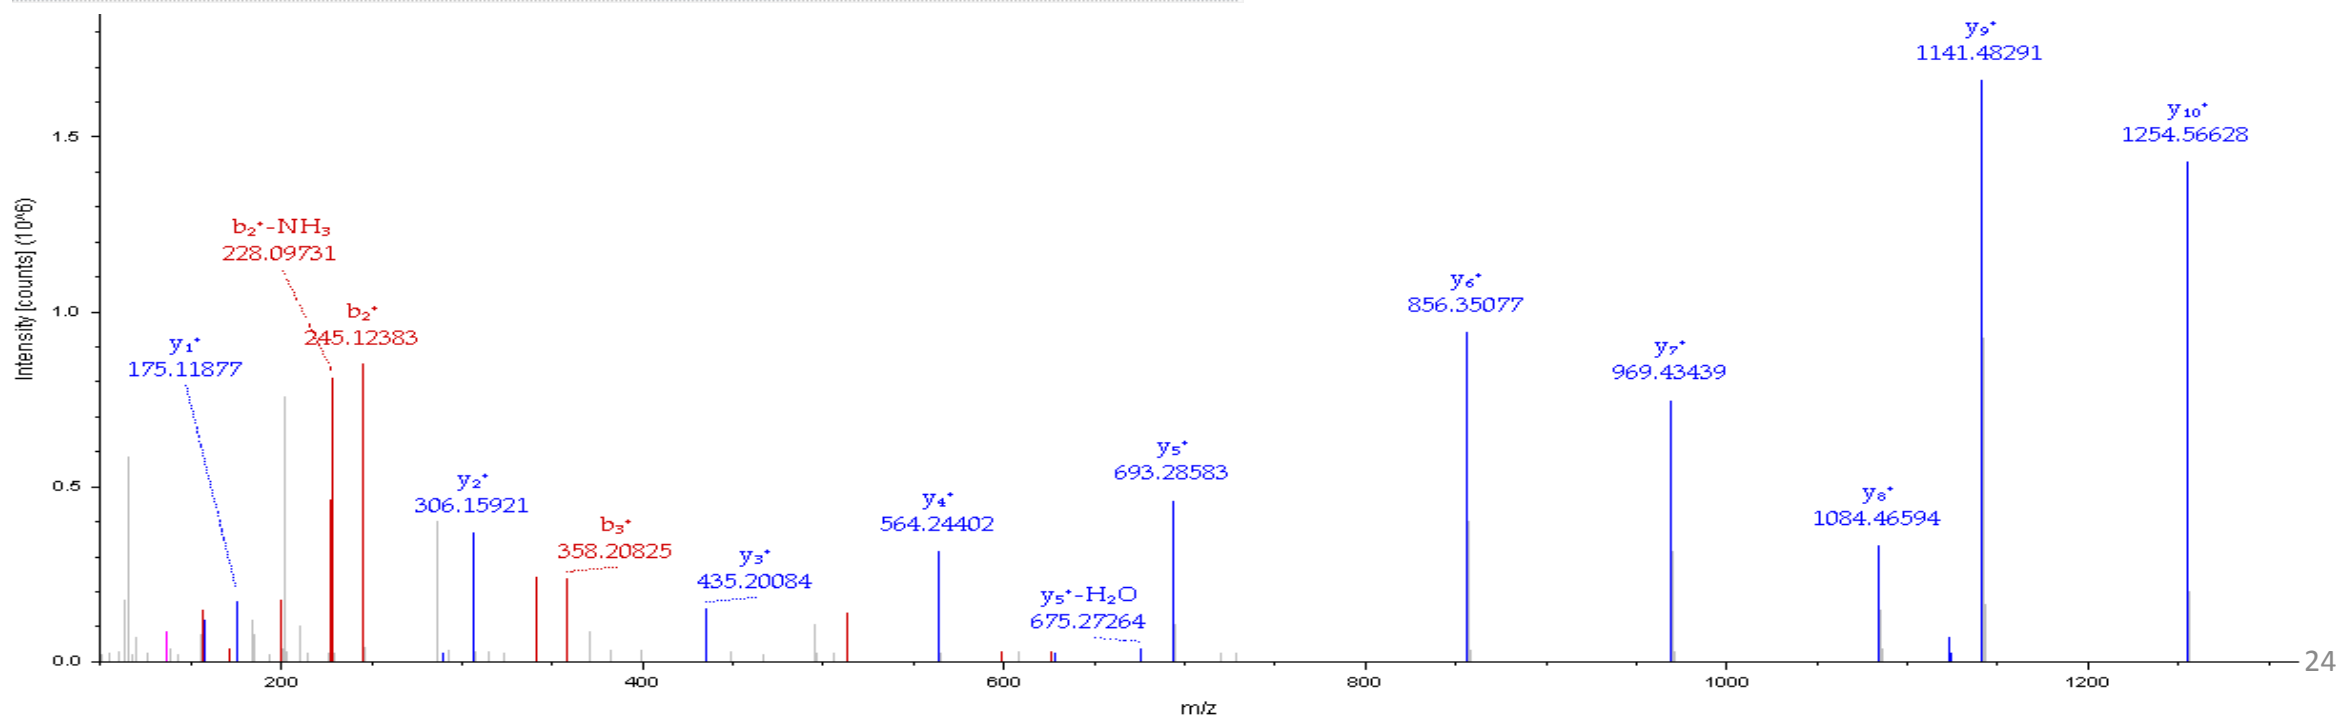



# AUP sample #118

Sequence: RDLGEELEALK, R1-Deamidated (0.98402 Da)

Charge: +2, Monoisotopic m/z: 637.33472 Da (-0.67 mmu/-1.05 ppm), MH+: 1273.66216 Da, RT: 54.05 min, Identified with: Sequest HT (v1.3); XCorr:2.80, Ions matched by search engine: 0/0

Fragment match tolerance used for search: 0.02 Da

Fragments used for search: b; b-H<sub>2</sub>O; b-NH<sub>3</sub>; y; y-H<sub>2</sub>O; y-NH<sub>3</sub>

Protein references (1):

- Myosin-9 OS=Homo sapiens GN=MYH9 PE=1 SV=4 - [MYH9\_HUMAN]

| #1 | Immonium  | a <sup>+</sup> | a <sup>2+</sup> | b <sup>+</sup> | b <sup>2+</sup> | Seq.        | y <sup>+</sup> | y <sup>2+</sup> | #2 |
|----|-----------|----------------|-----------------|----------------|-----------------|-------------|----------------|-----------------|----|
| 1  | 129.11348 | 130.09750      | 65.55239        | 158.09241      | 79.54984        | R-Deamid... |                |                 | 11 |
| 2  | 88.03931  | 245.12445      | 123.06586       | 273.11936      | 137.06332       | D           | 1116.57836     | 558.79282       | 10 |
| 3  | 86.09643  | 358.20852      | 179.60790       | 386.20343      | 193.60535       | L           | 1001.55141     | 501.27934       | 9  |
| 4  | 30.03383  | 415.22999      | 208.11863       | 443.22490      | 222.11609       | G           | 888.46734      | 444.73731       | 8  |
| 5  | 102.05496 | 544.27259      | 272.63993       | 572.26750      | 286.63739       | E           | 831.44587      | 416.22657       | 7  |
| 6  | 102.05496 | 673.31519      | 337.16123       | 701.31010      | 351.15869       | E           | 702.40327      | 351.70527       | 6  |
| 7  | 86.09643  | 786.39926      | 393.70327       | 814.39417      | 407.70072       | L           | 573.36067      | 287.18397       | 5  |
| 8  | 102.05496 | 915.44186      | 458.22457       | 943.43677      | 472.22202       | E           | 460.27660      | 230.64194       | 4  |
| 9  | 44.04948  | 986.47898      | 493.74313       | 1014.47389     | 507.74058       | A           | 331.23400      | 166.12064       | 3  |
| 10 | 86.09643  | 1099.56305     | 550.28516       | 1127.55796     | 564.28262       | L           | 260.19688      | 130.60208       | 2  |
| 11 |           |                |                 |                |                 | K           | 147.11281      | 74.06004        | 1  |

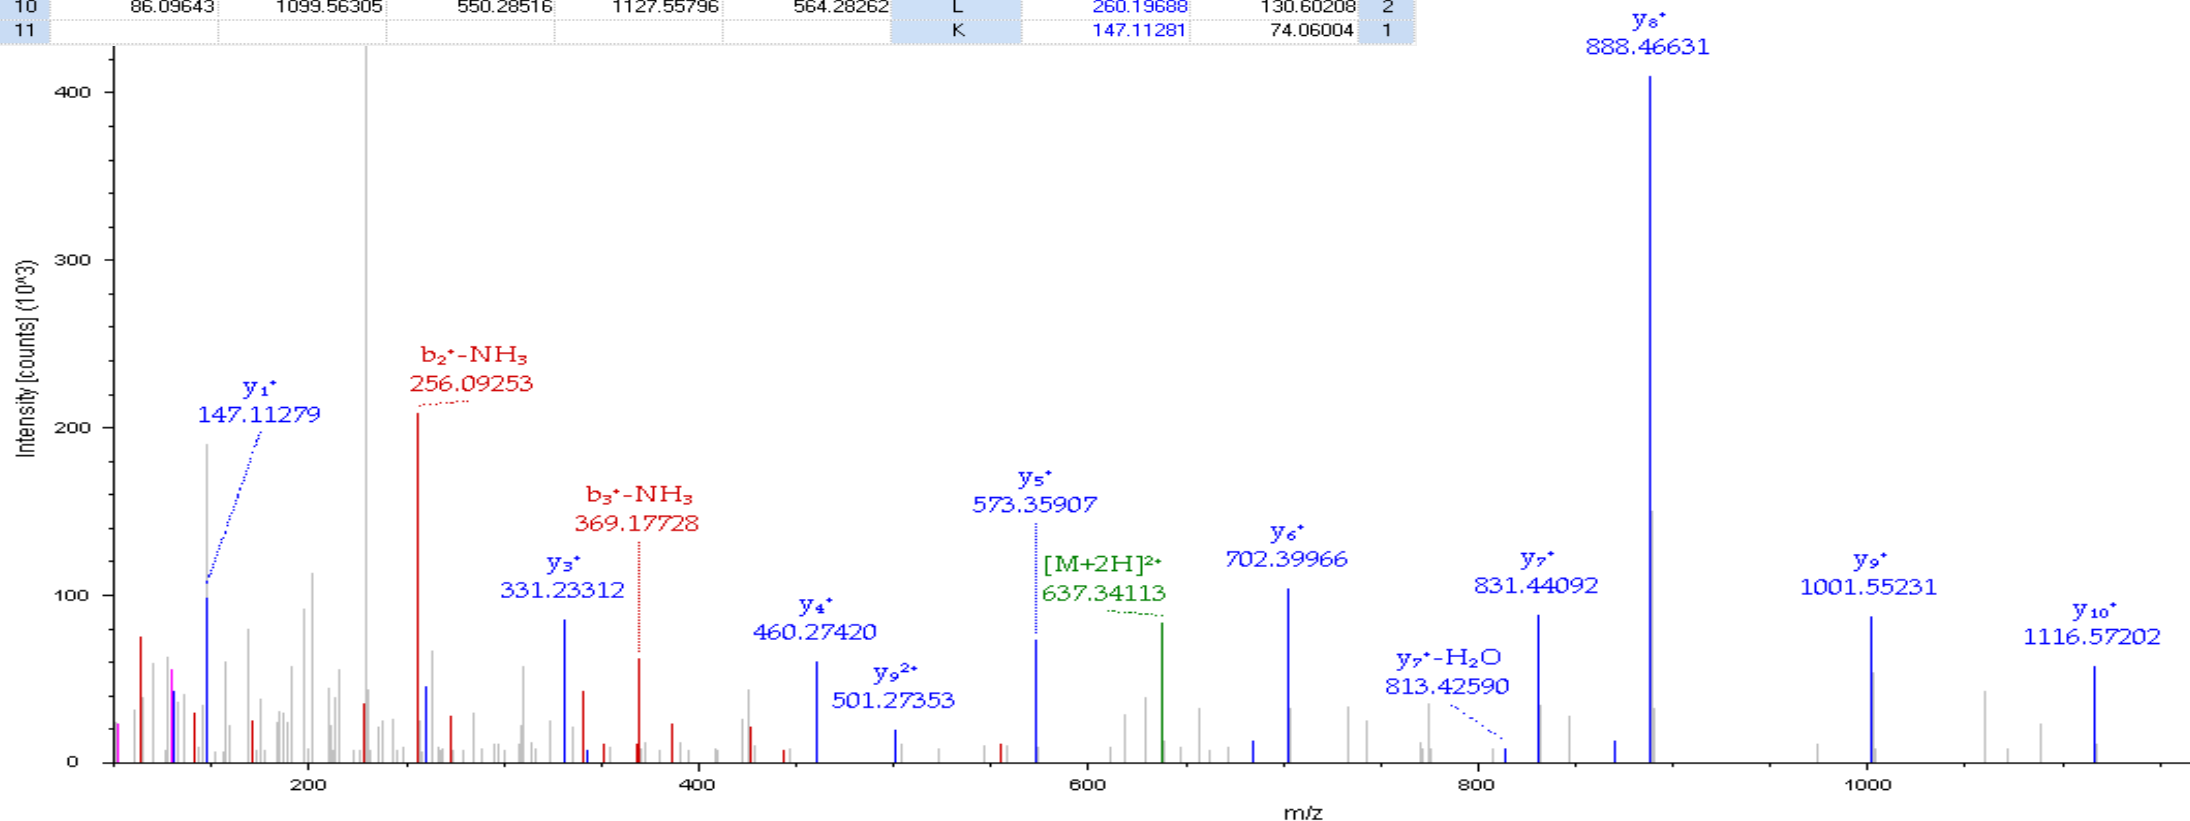

# AUP sample #118

Sequence: SRMGPSGGEGMEPER, R2-Deamidated (0.98402 Da)

Charge: +2, Monoisotopic m/z: 789.33606 Da (-1.77 mmu/-2.24 ppm), MH+: 1577.66484 Da, RT: 21.47 min,

Identified with: Sequest HT (v1.3); XCorr:1.98, Ions matched by search engine: 0/0

Fragment match tolerance used for search: 0.02 Da

Fragments used for search: b; b-H<sub>2</sub>O; b-NH<sub>3</sub>; y; y-H<sub>2</sub>O; y-NH<sub>3</sub>

Protein references (1):

- LIM and SH3 domain protein 1 OS=Homo sapiens GN=LASP1 PE=2 SV=1 - [B4DGQ0\_HUMAN]

| #1 | Immonium  | a <sup>+</sup> | a <sup>2+</sup> | b <sup>+</sup> | b <sup>2+</sup> | Seq.        | y <sup>+</sup> | y <sup>2+</sup> | #2 |
|----|-----------|----------------|-----------------|----------------|-----------------|-------------|----------------|-----------------|----|
| 1  | 60.04439  | 60.04439       | 30.52583        | 88.03931       | 44.52329        | S           |                |                 | 15 |
| 2  | 129.11348 | 217.12953      | 109.06840       | 245.12444      | 123.06586       | R-Deamid... | 1490.63635     | 745.82181       | 14 |
| 3  | 104.05286 | 348.17003      | 174.58865       | 376.16494      | 188.58611       | M           | 1333.55121     | 667.27924       | 13 |
| 4  | 30.03383  | 405.19150      | 203.09939       | 433.18641      | 217.09684       | G           | 1202.51071     | 601.75899       | 12 |
| 5  | 70.06513  | 502.24427      | 251.62577       | 530.23918      | 265.62323       | P           | 1145.48924     | 573.24826       | 11 |
| 6  | 60.04439  | 589.27630      | 295.14179       | 617.27121      | 309.13924       | S           | 1048.43647     | 524.72187       | 10 |
| 7  | 30.03383  | 646.29777      | 323.65252       | 674.29268      | 337.64998       | G           | 961.40444      | 481.20586       | 9  |
| 8  | 30.03383  | 703.31924      | 352.16326       | 731.31415      | 366.16071       | G           | 904.38297      | 452.69512       | 8  |
| 9  | 102.05496 | 832.36184      | 416.68456       | 860.35675      | 430.68201       | E           | 847.36150      | 424.18439       | 7  |
| 10 | 30.03383  | 889.38331      | 445.19529       | 917.37822      | 459.19275       | G           | 718.31890      | 359.66309       | 6  |
| 11 | 104.05286 | 1020.42381     | 510.71554       | 1048.41872     | 524.71300       | M           | 661.29743      | 331.15235       | 5  |
| 12 | 102.05496 | 1149.46641     | 575.23684       | 1177.46132     | 589.23430       | E           | 530.25693      | 265.63210       | 4  |
| 13 | 70.06513  | 1246.51918     | 623.76323       | 1274.51409     | 637.76068       | P           | 401.21433      | 201.11080       | 3  |
| 14 | 102.05496 | 1375.56178     | 688.28453       | 1403.55669     | 702.28198       | E           | 304.16156      | 152.58442       | 2  |
| 15 |           |                |                 |                |                 | R           | 175.11896      | 88.06312        | 1  |

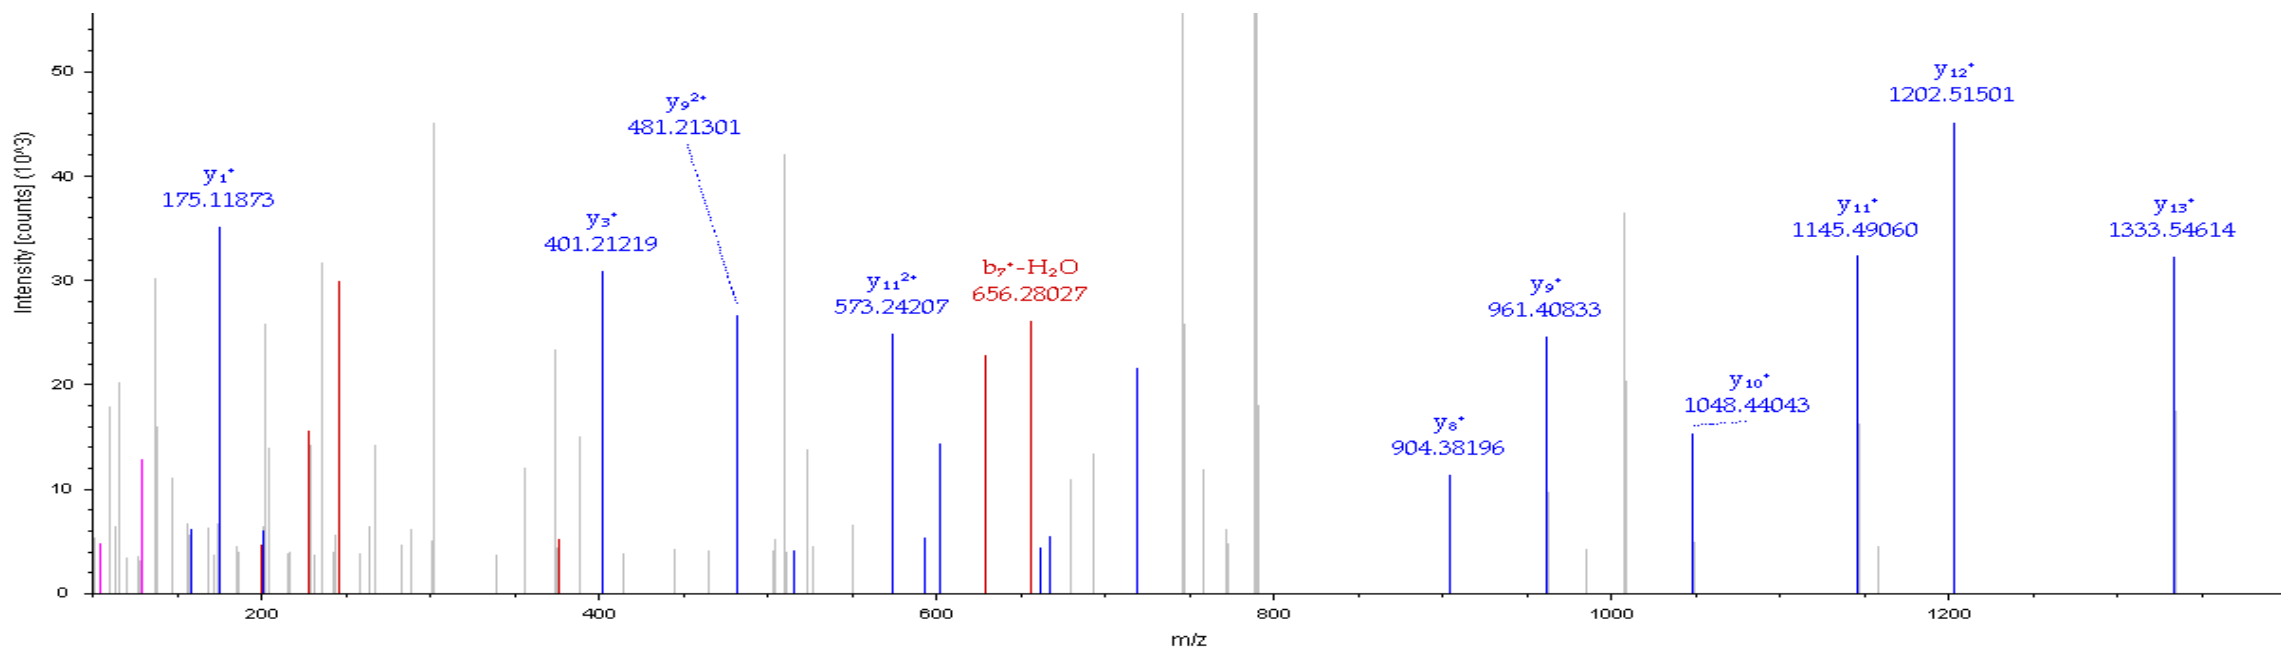

# AUP sample #118

Sequence: SRMGPSGGEGMEPER, R2-Deamidated (0.98402 Da), M3-Oxidation (15.99492 Da)  
 Charge: +2, Monoisotopic m/z: 797.33661 Da (+1.33 mmu/+1.66 ppm), MH+: 1593.66594 Da, RT: 13.71 min,  
 Identified with: Sequest HT (v1.3); XCorr:2.62, Ions matched by search engine: 0/0  
 Fragment match tolerance used for search: 0.02 Da  
 Fragments used for search: b; b-H<sub>2</sub>O; b-NH<sub>3</sub>; y; y-H<sub>2</sub>O; y-NH<sub>3</sub>

Protein references (1):

- LIM and SH3 domain protein 1 OS=Homo sapiens GN=LASP1 PE=1 SV=2 - [LASP1\_HUMAN]

| #1 | Immonium  | a <sup>+</sup> | a <sup>2+</sup> | b <sup>+</sup> | b <sup>2+</sup> | Seq.        | y <sup>+</sup> | y <sup>2+</sup> | #2 |
|----|-----------|----------------|-----------------|----------------|-----------------|-------------|----------------|-----------------|----|
| 1  | 60.04439  | 60.04439       | 30.52583        | 88.03931       | 44.52329        | S           |                |                 | 15 |
| 2  | 129.11348 | 217.12953      | 109.06840       | 245.12444      | 123.06586       | R-Deamid... | 1506.63126     | 753.81927       | 14 |
| 3  | 104.05286 | 364.16494      | 182.58611       | 392.15986      | 196.58357       | M-Oxidation | 1349.54613     | 675.27670       | 13 |
| 4  | 30.03383  | 421.18641      | 211.09684       | 449.18133      | 225.09430       | G           | 1202.51071     | 601.75899       | 12 |
| 5  | 70.06513  | 518.23918      | 259.62323       | 546.23410      | 273.62069       | P           | 1145.48924     | 573.24826       | 11 |
| 6  | 60.04439  | 605.27121      | 303.13924       | 633.26613      | 317.13670       | S           | 1048.43647     | 524.72187       | 10 |
| 7  | 30.03383  | 662.29268      | 331.64998       | 690.28760      | 345.64744       | G           | 961.40444      | 481.20586       | 9  |
| 8  | 30.03383  | 719.31415      | 360.16071       | 747.30907      | 374.15817       | G           | 904.38297      | 452.69512       | 8  |
| 9  | 102.05496 | 848.35675      | 424.68201       | 876.35167      | 438.67947       | E           | 847.36150      | 424.18439       | 7  |
| 10 | 30.03383  | 905.37822      | 453.19275       | 933.37314      | 467.19021       | G           | 718.31890      | 359.66309       | 6  |
| 11 | 104.05286 | 1036.41872     | 518.71300       | 1064.41364     | 532.71046       | M           | 661.29743      | 331.15235       | 5  |
| 12 | 102.05496 | 1165.46132     | 583.23430       | 1193.45624     | 597.23176       | E           | 530.25693      | 265.63210       | 4  |
| 13 | 70.06513  | 1262.51409     | 631.76068       | 1290.50901     | 645.75814       | P           | 401.21433      | 201.11080       | 3  |
| 14 | 102.05496 | 1391.55669     | 696.28198       | 1419.55161     | 710.27944       | E           | 304.16156      | 152.58442       | 2  |
| 15 |           |                |                 |                |                 | R           | 175.11896      | 88.06312        | 1  |

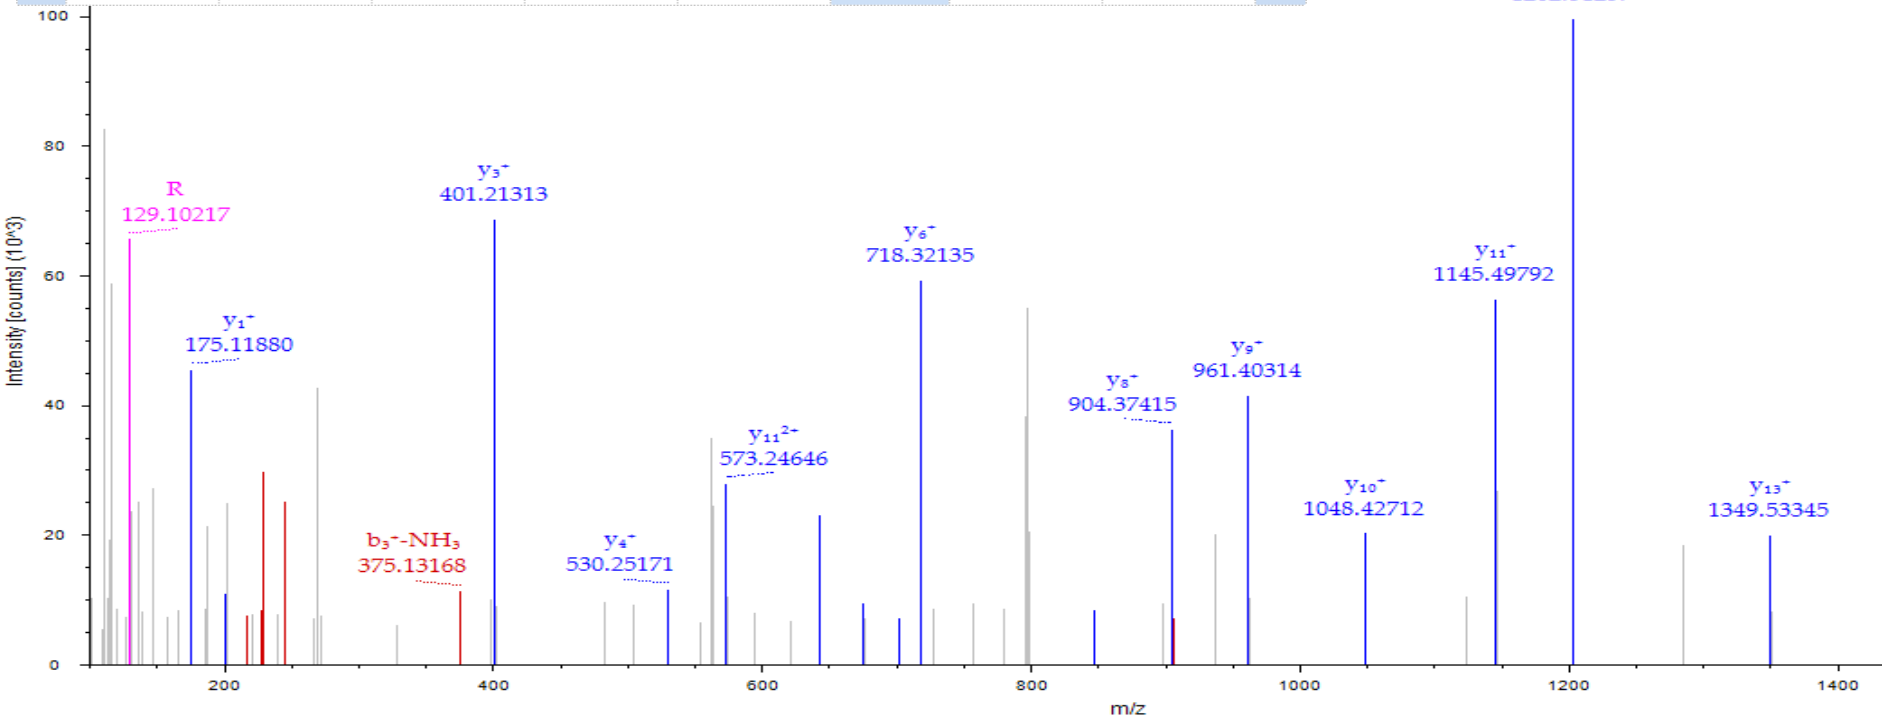

# AUP sample #118

Sequence: RGPPPPPR, R1-Deamidated (0.98402 Da)

Charge: +2, Monoisotopic m/z: 437.74869 Da (+0.34 mmu/+0.78 ppm), MH+: 874.49010 Da, RT: 11.77 min,

Identified with: Sequest HT (v1.3); XCorr:1.51, Ions matched by search engine: 0/0

Fragment match tolerance used for search: 0.02 Da

Fragments used for search: b; b-NH<sub>3</sub>; y; y-NH<sub>3</sub>

Protein references (4):

- RNA-binding motif protein, X chromosome OS=Homo sapiens GN=RBMX PE=1 SV=3 - [RBMX\_HUMAN]

| #1 | Immonium  | a <sup>+</sup> | a <sup>2+</sup> | b <sup>+</sup> | b <sup>2+</sup> | Seq.        | y <sup>+</sup> | y <sup>2+</sup> | #2 |
|----|-----------|----------------|-----------------|----------------|-----------------|-------------|----------------|-----------------|----|
| 1  | 129.11348 | 130.09750      | 65.55239        | 158.09241      | 79.54984        | R-Deamid... |                |                 | 8  |
| 2  | 30.03383  | 187.11897      | 94.06312        | 215.11388      | 108.06058       | G           | 717.40428      | 359.20578       | 7  |
| 3  | 70.06513  | 284.17174      | 142.58951       | 312.16665      | 156.58696       | P           | 660.38281      | 330.69504       | 6  |
| 4  | 70.06513  | 381.22451      | 191.11589       | 409.21942      | 205.11335       | P           | 563.33004      | 282.16866       | 5  |
| 5  | 70.06513  | 478.27728      | 239.64228       | 506.27219      | 253.63973       | P           | 466.27727      | 233.64227       | 4  |
| 6  | 70.06513  | 575.33005      | 288.16866       | 603.32496      | 302.16612       | P           | 369.22450      | 185.11589       | 3  |
| 7  | 70.06513  | 672.38282      | 336.69505       | 700.37773      | 350.69250       | P           | 272.17173      | 136.58950       | 2  |
| 8  |           |                |                 |                |                 | R           | 175.11896      | 88.06312        | 1  |

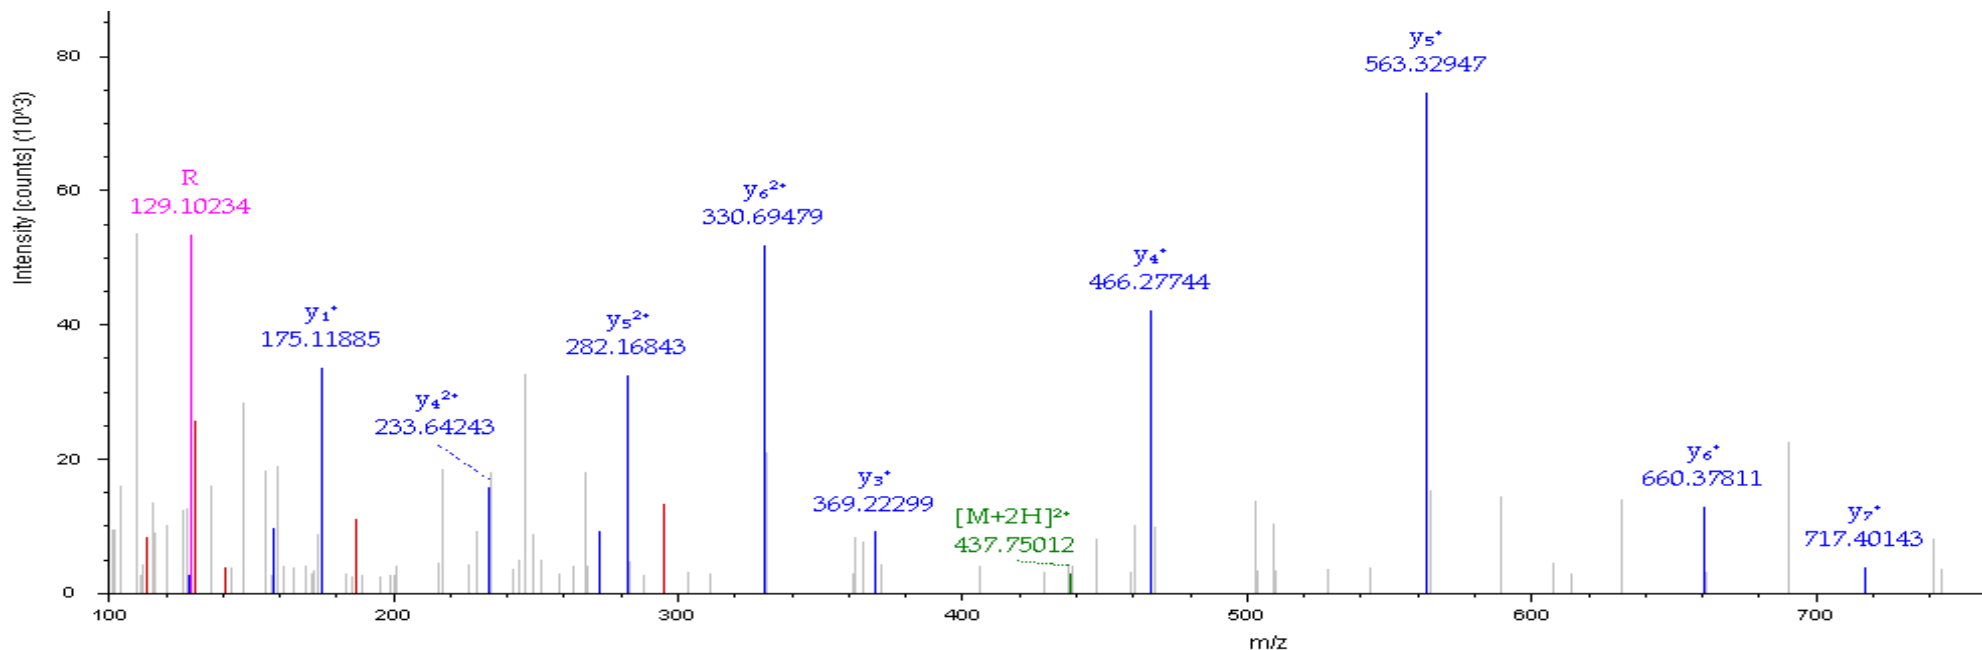

# AUP sample #118

Sequence: RDYDDMSPR, R1-Deamidated (0.98402 Da)

Charge: +2, Monoisotopic m/z: 578.24115 Da (+0.73 mmu/+1.26 ppm), MH+: 1155.47502 Da, RT: 19.75 min,

Identified with: Sequest HT (v1.3); XCorr:2.18, Ions matched by search engine: 0/0

Fragment match tolerance used for search: 0.02 Da

Fragments used for search: b; b-H<sub>2</sub>O; b-NH<sub>3</sub>; y; y-H<sub>2</sub>O; y-NH<sub>3</sub>

Protein references (1):

- Heterogeneous nuclear ribonucleoprotein K OS=Homo sapiens GN=HNRNPK PE=1 SV=1 - [HNRNPK\_HUMAN]

| #1 | Immonium  | b <sup>+</sup> | b <sup>2+</sup> | Seq.        | y <sup>+</sup> | y <sup>2+</sup> | #2 |
|----|-----------|----------------|-----------------|-------------|----------------|-----------------|----|
| 1  | 129.11348 | 158.09241      | 79.54984        | R-Deamid... |                |                 | 9  |
| 2  | 88.03931  | 273.11936      | 137.06332       | D           | 998.38843      | 499.69785       | 8  |
| 3  | 136.07568 | 436.18268      | 218.59498       | Y           | 883.36148      | 442.18438       | 7  |
| 4  | 88.03931  | 551.20963      | 276.10845       | D           | 720.29816      | 360.65272       | 6  |
| 5  | 88.03931  | 666.23658      | 333.62193       | D           | 605.27121      | 303.13924       | 5  |
| 6  | 104.05286 | 797.27708      | 399.14218       | M           | 490.24426      | 245.62577       | 4  |
| 7  | 60.04439  | 884.30911      | 442.65819       | S           | 359.20376      | 180.10552       | 3  |
| 8  | 70.06513  | 981.36188      | 491.18458       | P           | 272.17173      | 136.58950       | 2  |
| 9  |           |                |                 | R           | 175.11896      | 88.06312        | 1  |

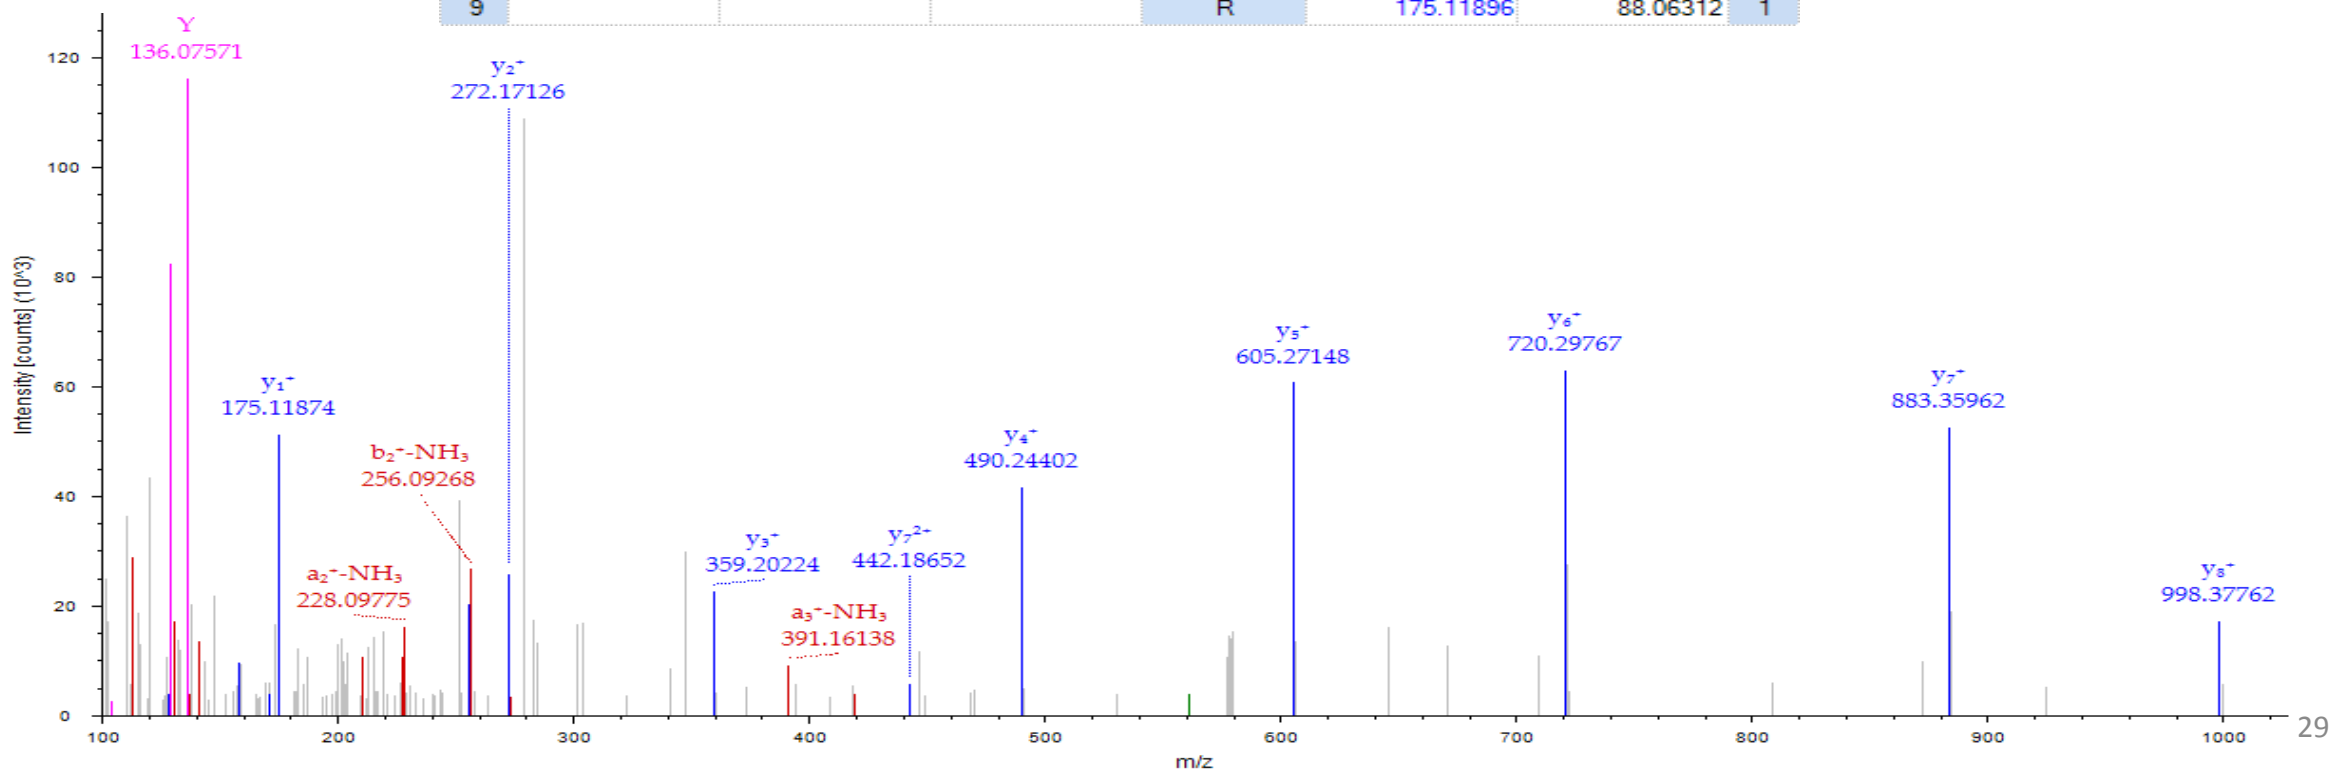

# AUP sample #118

Sequence: REEDEPEER, R1-Deamidated (0.98402 Da)

Charge: +2, Monoisotopic m/z: 595.25061 Da (-1.44 mmu/-2.42 ppm), MH+: 1189.49394 Da, RT: 9.29 min,

Identified with: Sequest HT (v1.3); XCorr:2.07, Ions matched by search engine: 0/0

Fragment match tolerance used for search: 0.02 Da

Fragments used for search: b; b-H<sub>2</sub>O; b-NH<sub>3</sub>; y; y-H<sub>2</sub>O; y-NH<sub>3</sub>

Protein references (1):

- Heterogeneous nuclear ribonucleoprotein U-like protein 2 OS=Homo sapiens GN=HNRNPUL2 PE=1 SV=1 - [HNRL2\_HUMAN]

| #1 | Immonium  | a <sup>+</sup> | a <sup>2+</sup> | b <sup>+</sup> | b <sup>2+</sup> | Seq.        | y <sup>+</sup> | y <sup>2+</sup> | #2 |
|----|-----------|----------------|-----------------|----------------|-----------------|-------------|----------------|-----------------|----|
| 1  | 129.11348 | 130.09750      | 65.55239        | 158.09241      | 79.54984        | R-Deamid... |                |                 | 9  |
| 2  | 102.05496 | 259.14010      | 130.07369       | 287.13501      | 144.07114       | E           | 1032.41168     | 516.70948       | 8  |
| 3  | 102.05496 | 388.18270      | 194.59499       | 416.17761      | 208.59244       | E           | 903.36908      | 452.18818       | 7  |
| 4  | 88.03931  | 503.20965      | 252.10846       | 531.20456      | 266.10592       | D           | 774.32648      | 387.66688       | 6  |
| 5  | 102.05496 | 632.25225      | 316.62976       | 660.24716      | 330.62722       | E           | 659.29953      | 330.15340       | 5  |
| 6  | 70.06513  | 729.30502      | 365.15615       | 757.29993      | 379.15360       | P           | 530.25693      | 265.63210       | 4  |
| 7  | 102.05496 | 858.34762      | 429.67745       | 886.34253      | 443.67490       | E           | 433.20416      | 217.10572       | 3  |
| 8  | 102.05496 | 987.39022      | 494.19875       | 1015.38513     | 508.19620       | E           | 304.16156      | 152.58442       | 2  |
| 9  |           |                |                 |                |                 | R           | 175.11896      | 88.06312        | 1  |

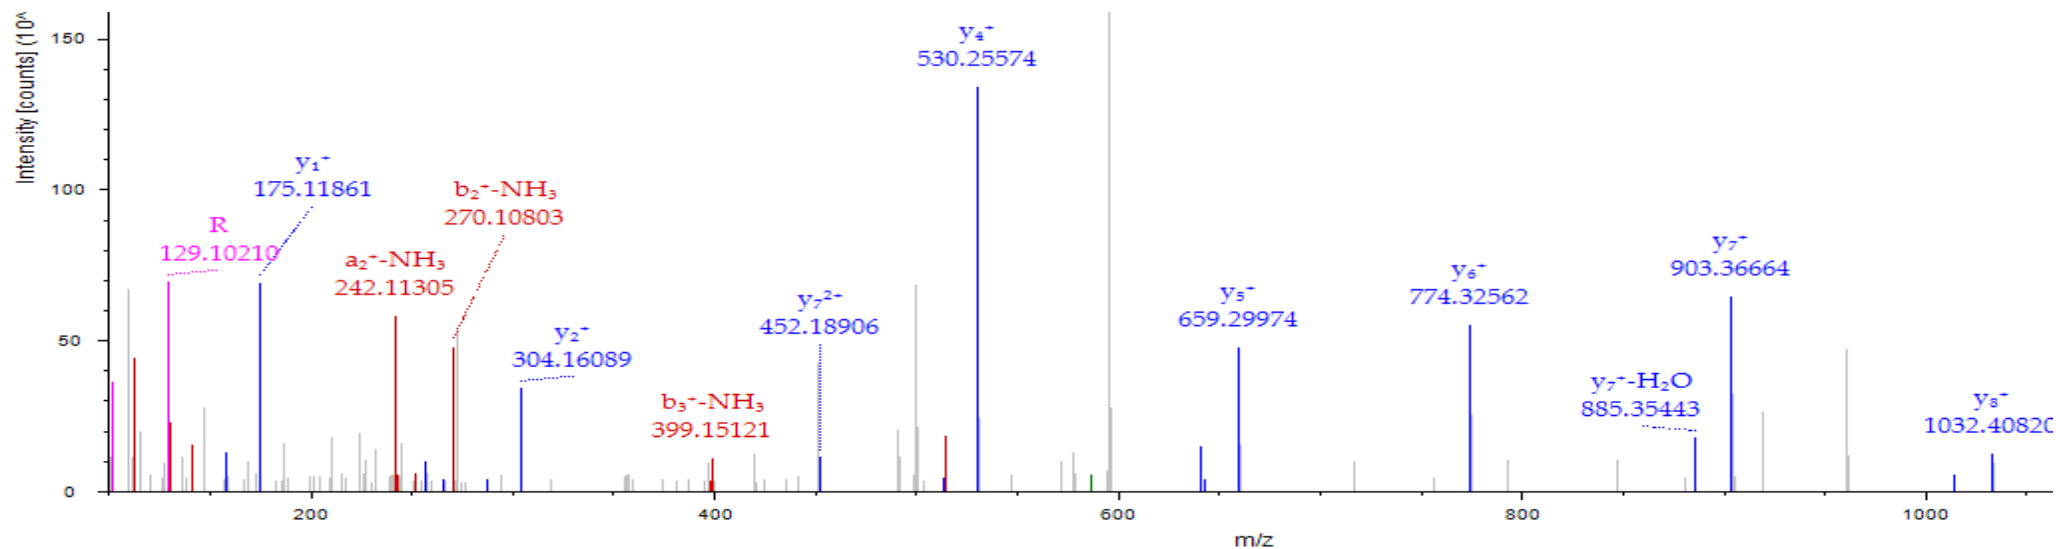

# AUP sample #118

Sequence: KREPEDEGEDDD, R2-Deamidated (0.98402 Da)

Charge: +2, Monoisotopic m/z: 717.77820 Da (-0.63 mmu/-0.88 ppm), MH+: 1434.54912 Da, RT: 9.11 min,

Identified with: Sequest HT (v1.3); XCorr:2.38, Ions matched by search engine: 0/0

Fragment match tolerance used for search: 0.02 Da

Fragments used for search: b; b-H<sub>2</sub>O; b-NH<sub>3</sub>; y; y-H<sub>2</sub>O; y-NH<sub>3</sub>

Protein references (1):

- Acidic leucine-rich nuclear phosphoprotein 32 family member A OS=Homo sapiens GN=ANP32A PE=1 SV=1 - [AN32A\_HUMAN]

| #1 | b <sup>+</sup> | Seq.        | y <sup>+</sup> | #2 |
|----|----------------|-------------|----------------|----|
| 1  | 129.10225      | K           |                | 12 |
| 2  | 286.18738      | R-Deamid... | 1306.45542     | 11 |
| 3  | 415.22998      | E           | 1149.37028     | 10 |
| 4  | 512.28275      | P           | 1020.32768     | 9  |
| 5  | 641.32535      | E           | 923.27491      | 8  |
| 6  | 756.35230      | D           | 794.23231      | 7  |
| 7  | 885.39490      | E           | 679.20536      | 6  |
| 8  | 942.41637      | G           | 550.16276      | 5  |
| 9  | 1071.45897     | E           | 493.14129      | 4  |
| 10 | 1186.48592     | D           | 364.09869      | 3  |
| 11 | 1301.51287     | D           | 249.07174      | 2  |
| 12 |                | D           | 134.04479      | 1  |

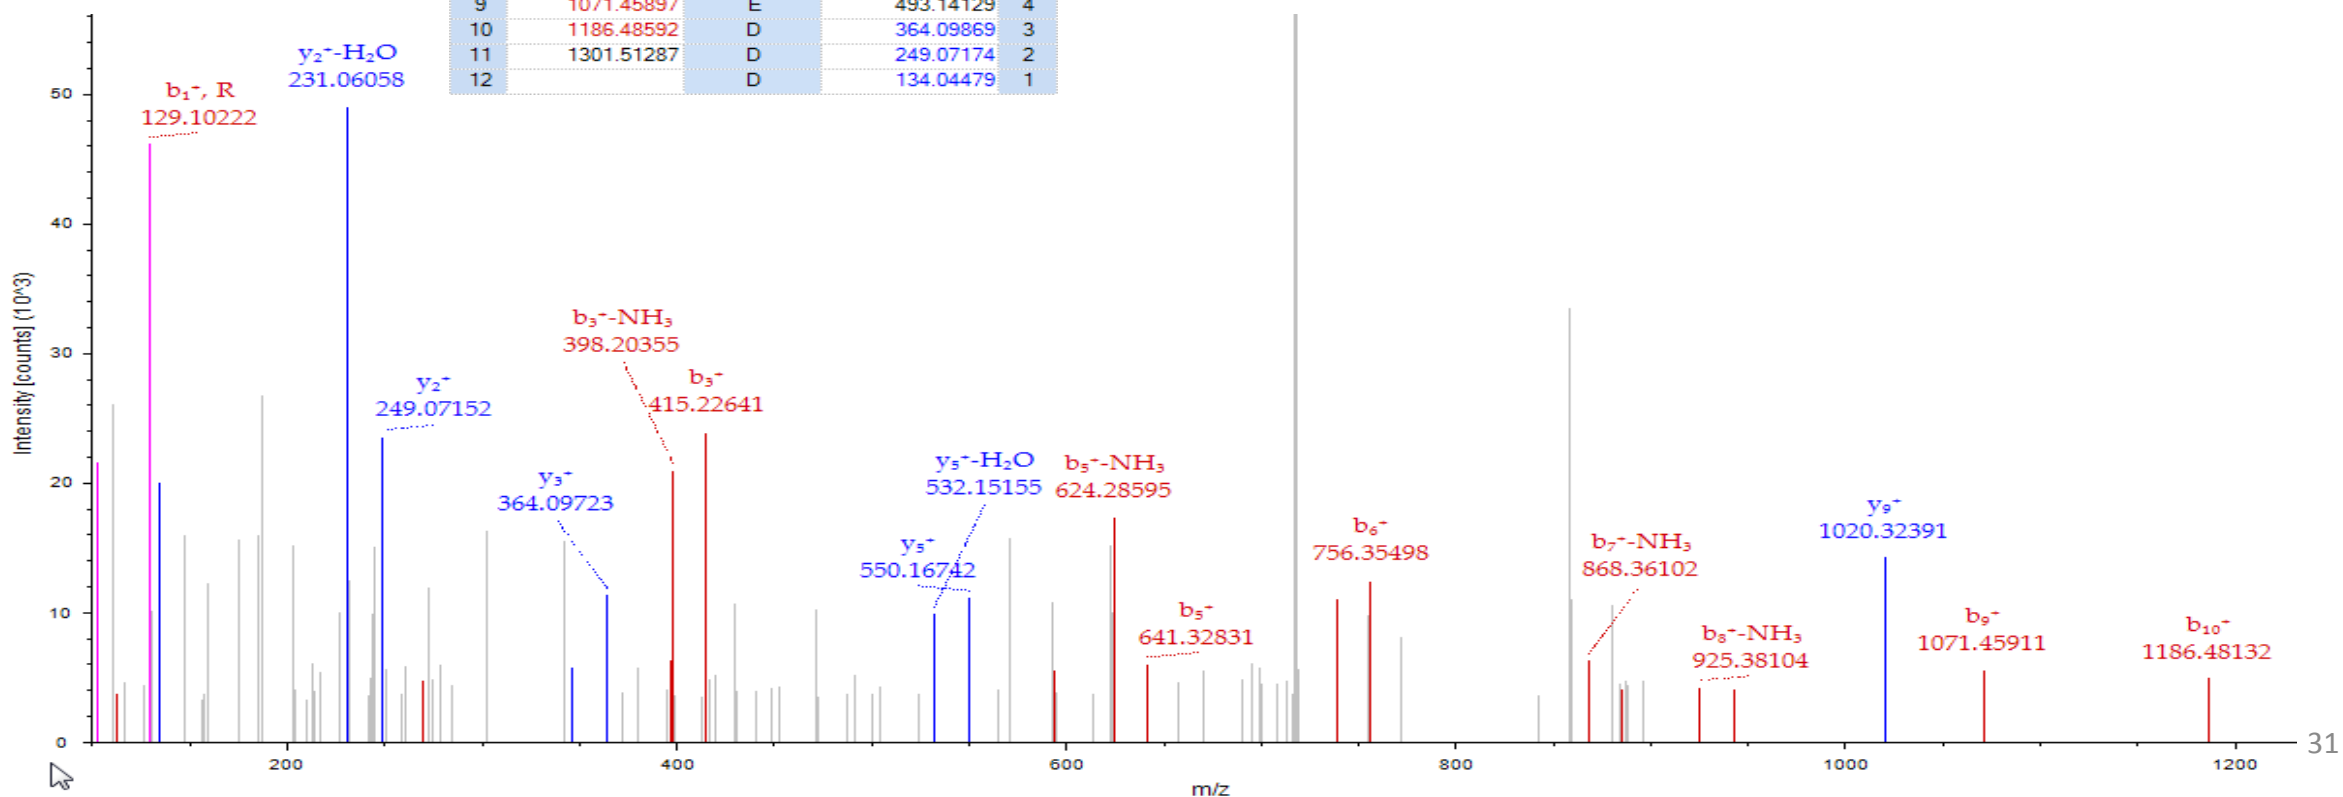

## DUP sample #2

Sequence: ILTER(196)GYSFTTTAER, R5-Deamidated (0.98402 Da)

Charge: +2, Monoisotopic m/z: 873.44525 Da (+6.36 mmu/+7.28 ppm), MH+: 1745.88323 Da, RT: 54.08 min,

Identified with: Sequest HT (v1.3); XCorr:3.44, Ions matched by search engine: 0/0

Fragment match tolerance used for search: 0.02 Da

Fragments used for search: b; b-H<sub>2</sub>O; b-NH<sub>3</sub>; y; y-H<sub>2</sub>O; y-NH<sub>3</sub>

Protein references (1):

- Actin, cytoplasmic 1 OS=Homo sapiens GN=ACTB PE=1 SV=1 - [ACTB\_HUMAN]

| #1 | Immonium  | a <sup>+</sup> | a <sup>2+</sup> | b <sup>+</sup> | b <sup>2+</sup> | Seq.        | y <sup>+</sup> | y <sup>2+</sup> | #2 |
|----|-----------|----------------|-----------------|----------------|-----------------|-------------|----------------|-----------------|----|
| 1  | 86.09643  | 86.09643       | 43.55185        | 114.09135      | 57.54931        | I           |                |                 | 15 |
| 2  | 86.09643  | 199.18050      | 100.09389       | 227.17542      | 114.09135       | L           | 1632.78645     | 816.89686       | 14 |
| 3  | 74.06004  | 300.22818      | 150.61773       | 328.22310      | 164.61519       | T           | 1519.70238     | 760.35483       | 13 |
| 4  | 102.05496 | 429.27078      | 215.13903       | 457.26570      | 229.13649       | E           | 1418.65470     | 709.83099       | 12 |
| 5  | 129.11348 | 586.35592      | 293.68160       | 614.35083      | 307.67905       | R-Deamid... | 1289.61210     | 645.30969       | 11 |
| 6  | 30.03383  | 643.37739      | 322.19233       | 671.37230      | 336.18979       | G           | 1132.52696     | 566.76712       | 10 |
| 7  | 136.07568 | 806.44071      | 403.72399       | 834.43562      | 417.72145       | Y           | 1075.50549     | 538.25638       | 9  |
| 8  | 60.04439  | 893.47274      | 447.24001       | 921.46765      | 461.23746       | S           | 912.44217      | 456.72472       | 8  |
| 9  | 120.08078 | 1040.54116     | 520.77422       | 1068.53607     | 534.77167       | F           | 825.41014      | 413.20871       | 7  |
| 10 | 74.06004  | 1141.58884     | 571.29806       | 1169.58375     | 585.29551       | T           | 678.34172      | 339.67450       | 6  |
| 11 | 74.06004  | 1242.63652     | 621.82190       | 1270.63143     | 635.81935       | T           | 577.29404      | 289.15066       | 5  |
| 12 | 74.06004  | 1343.68420     | 672.34574       | 1371.67911     | 686.34319       | T           | 476.24636      | 238.62682       | 4  |
| 13 | 44.04948  | 1414.72132     | 707.86430       | 1442.71623     | 721.86175       | A           | 375.19868      | 188.10298       | 3  |
| 14 | 102.05496 | 1543.76392     | 772.38560       | 1571.75883     | 786.38305       | E           | 304.16156      | 152.58442       | 2  |
| 15 |           |                |                 |                |                 | R           | 175.11896      | 88.06312        | 1  |

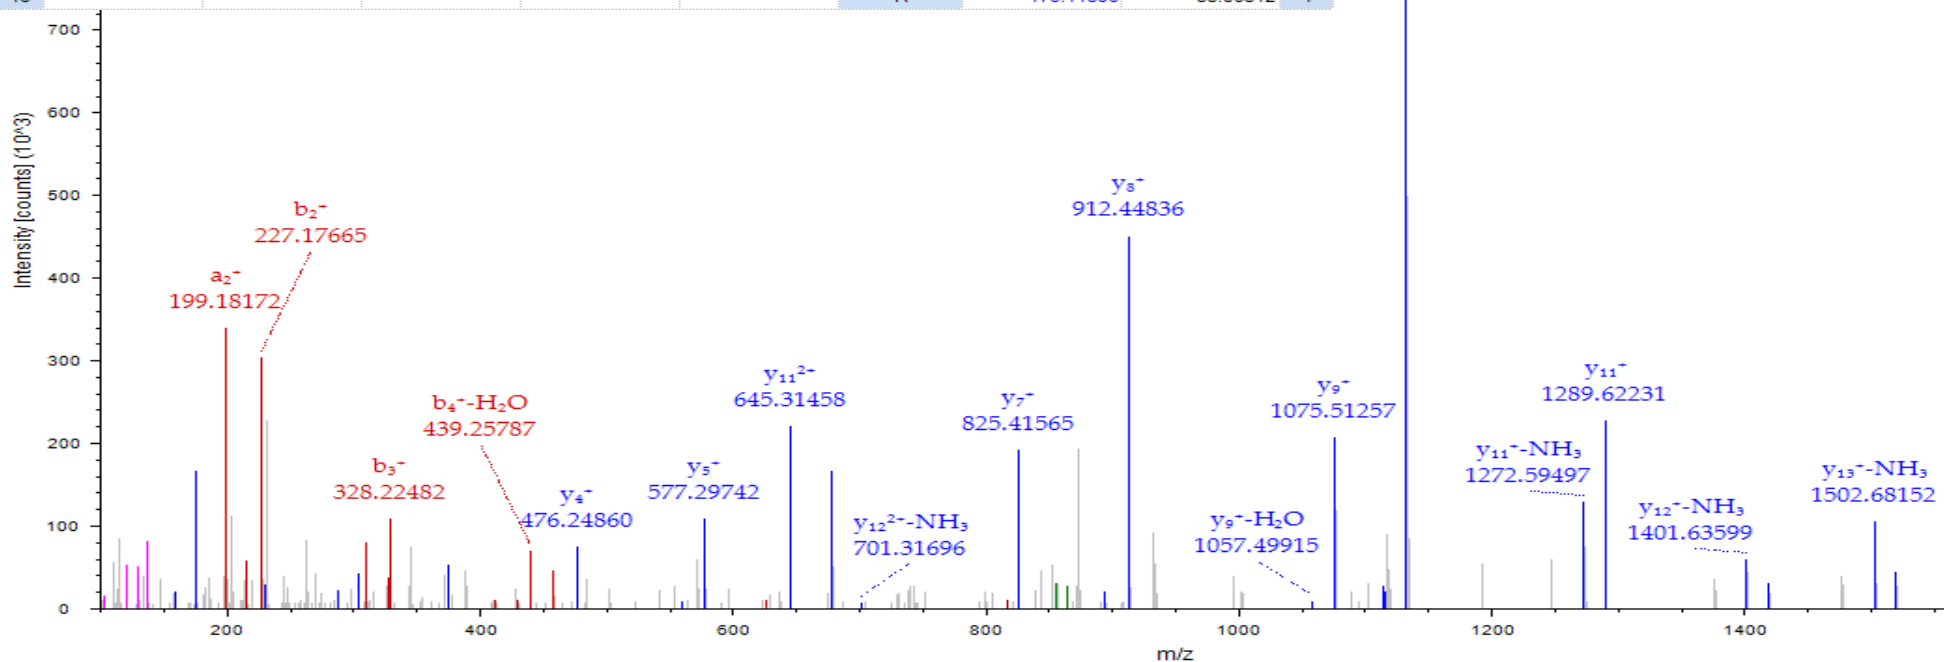



# DUP sample #2

Sequence: ILTE**R(196)**GYSFTTTA**ER(206)**EIV**R(210)**DIK, R5-Deamidated (0.98402 Da), R15-Deamidated (0.98402 Da), R19-Deamidated (0.98402 Da)  
 Charge: +3, Monoisotopic m/z: 867.79004 Da (+4.94 mmu/+5.69 ppm), MH+: 2601.35556 Da, RT: 86.96 min,  
 Identified with: Sequest HT (v1.3); XCorr:3.69, Ions matched by search engine: 0/0  
 Fragment match tolerance used for search: 0.02 Da  
 Fragments used for search: b; b-H<sub>2</sub>O; b-NH<sub>3</sub>; y; y-H<sub>2</sub>O; y-NH<sub>3</sub>

Protein references (1):

- Actin, cytoplasmic 1 OS=Homo sapiens GN=ACTB PE=1 SV=1 - [ACTB\_HUMAN]

| #1 | Immonium  | a <sup>+</sup> | a <sup>2+</sup> | b <sup>+</sup> | b <sup>2+</sup> | Seq.        | y <sup>+</sup> | y <sup>2+</sup> | #2 |
|----|-----------|----------------|-----------------|----------------|-----------------|-------------|----------------|-----------------|----|
| 1  | 86.09643  | 86.09643       | 43.55185        | 114.09135      | 57.54931        | I           |                |                 | 22 |
| 2  | 86.09643  | 199.18050      | 100.09389       | 227.17542      | 114.09135       | L           | 2488.25668     | 1244.63198      | 21 |
| 3  | 74.06004  | 300.22818      | 150.61773       | 328.22310      | 164.61519       | T           | 2375.17261     | 1188.08994      | 20 |
| 4  | 102.05496 | 429.27078      | 215.13903       | 457.26570      | 229.13649       | E           | 2274.12493     | 1137.56610      | 19 |
| 5  | 129.11348 | 586.35592      | 293.68160       | 614.35083      | 307.67905       | R-Deamid... | 2145.08233     | 1073.04480      | 18 |
| 6  | 30.03383  | 643.37739      | 322.19233       | 671.37230      | 336.18979       | G           | 1987.99719     | 994.50223       | 17 |
| 7  | 136.07568 | 806.44071      | 403.72399       | 834.43562      | 417.72145       | Y           | 1930.97572     | 965.99150       | 16 |
| 8  | 60.04439  | 893.47274      | 447.24001       | 921.46765      | 461.23746       | S           | 1767.91240     | 884.45984       | 15 |
| 9  | 120.08078 | 1040.54116     | 520.77422       | 1068.53607     | 534.77167       | F           | 1680.88037     | 840.94382       | 14 |
| 10 | 74.06004  | 1141.58884     | 571.29806       | 1169.58375     | 585.29551       | T           | 1533.81195     | 767.40961       | 13 |
| 11 | 74.06004  | 1242.63652     | 621.82190       | 1270.63143     | 635.81935       | T           | 1432.76427     | 716.88577       | 12 |
| 12 | 74.06004  | 1343.68420     | 672.34574       | 1371.67911     | 686.34319       | T           | 1331.71659     | 666.36193       | 11 |
| 13 | 44.04948  | 1414.72132     | 707.86430       | 1442.71623     | 721.86175       | A           | 1230.66891     | 615.83809       | 10 |
| 14 | 102.05496 | 1543.76392     | 772.38560       | 1571.75883     | 786.38305       | E           | 1159.63179     | 580.31953       | 9  |
| 15 | 129.11348 | 1700.84905     | 850.92817       | 1728.84397     | 864.92562       | R-Deamid... | 1030.58919     | 515.79823       | 8  |
| 16 | 102.05496 | 1829.89165     | 915.44947       | 1857.88657     | 929.44692       | E           | 873.50406      | 437.25567       | 7  |
| 17 | 86.09643  | 1942.97572     | 971.99150       | 1970.97064     | 985.98896       | I           | 744.46146      | 372.73437       | 6  |
| 18 | 72.08078  | 2042.04414     | 1021.52571      | 2070.03906     | 1035.52317      | V           | 631.37739      | 316.19233       | 5  |
| 19 | 129.11348 | 2199.12928     | 1100.06828      | 2227.12419     | 1114.06574      | R-Deamid... | 532.30897      | 266.65812       | 4  |
| 20 | 88.03931  | 2314.15623     | 1157.58175      | 2342.15114     | 1171.57921      | D           | 375.22383      | 188.11555       | 3  |
| 21 | 86.09643  | 2427.24030     | 1214.12379      | 2455.23521     | 1228.12125      | I           | 260.19688      | 130.60208       | 2  |
| 22 |           |                |                 |                |                 | K           | 147.11281      | 74.06004        | 1  |

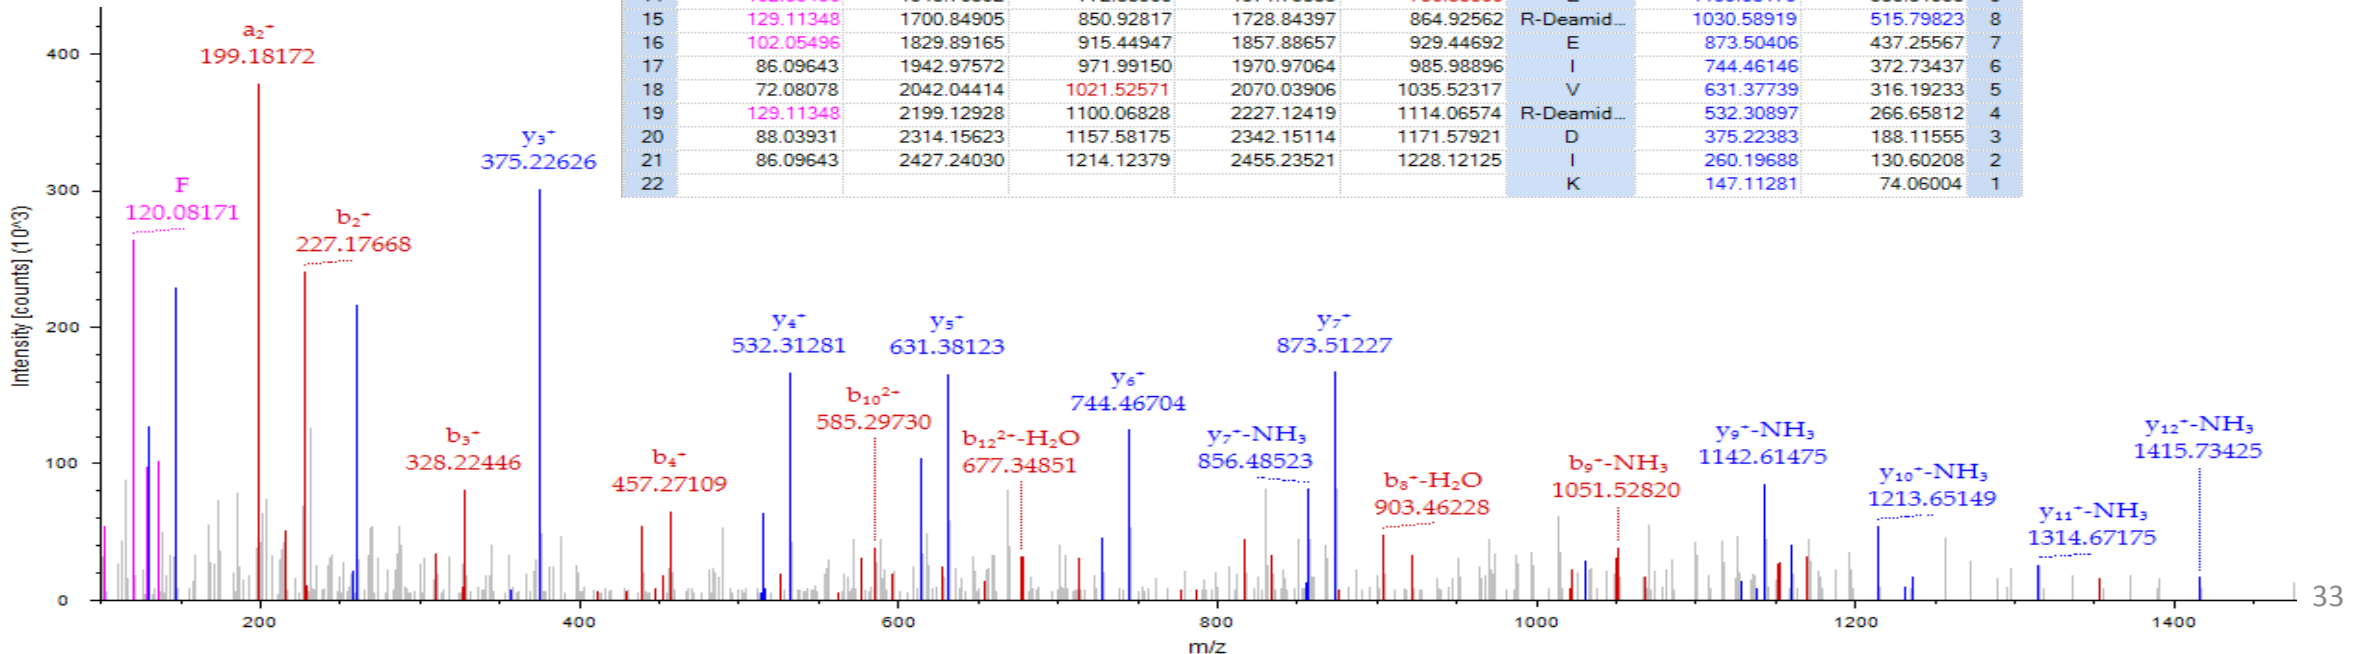

Supplement: ppat.1006151.s004.pdf [file ppat.1006151.s004.pdf]
